# Supplementary material for: Mechanistic differences between aryl iodide electrophiles and pronucleophiles in Pd-catalyzed coupling with cyclopropenes: a DFT study
Source: Royal Society of Chemistry journal article supplement (doi:10.1039/d2qo00966h), 2022-01-01
Supplement: d2qo00966h1.pdf [file d2qo00966h1.pdf]

*Supporting Information*

**Mechanistic differences between aryl iodide electrophiles and  
pronucleophiles in Pd-catalyzed coupling with cyclopropenes: A DFT study**

Kang Lv<sup>a,c</sup> and Xiaoguang Bao<sup>\*a,b</sup>

<sup>a</sup> *Innovation Center for Chemical Sciences, College of Chemistry, Chemical Engineering and Materials Science,  
Soochow University, 199 Ren-Ai Road, Suzhou Industrial Park, Suzhou, Jiangsu 215123, China.*

<sup>b</sup> *Jiangsu Key Laboratory of Advanced Negative Carbon Technologies, Soochow University, Suzhou, Jiangsu  
215123, China.*

<sup>c</sup> *School of Chemistry, Chemical Engineering and Materials, Jining University, Qufu, Shandong 273155, China.*

E-mail: xgbao@suda.edu.cn

**Contents**

|                                              |                 |
|----------------------------------------------|-----------------|
| <b>1. Figures S1 ~ S6</b>                    | <b>S2 ~ S5</b>  |
| <b>2. Table S1</b>                           | <b>S5</b>       |
| <b>3. Figures S7 ~ S10</b>                   | <b>S6 ~ S7</b>  |
| <b>4. Cartesian Coordinates and Energies</b> | <b>S8 ~ S82</b> |

Correction of translational entropy in solution:

In general, entropy can be partitioned into translational ( $S_{trans}$ ), rotational ( $S_{rot}$ ), and vibrational ( $S_{vib}$ ) components.

$$S = S_{trans} + S_{rot} + S_{vib}$$

Although each component has different values in gas and condensed phase, the translational entropy in solution is substantially different from that in gas phase because translational movement is considerably suppressed in solution. In contrast, the rotational and vibrational entropies are only moderately different between in solution and in gas phase. Consequently, we need to evaluate  $S_{trans}$  in solution when we discuss Gibbs energy change in solution. In gas phase,  $S_{trans}$  could be given by the Sackur-Tetrode equation.<sup>S1</sup> However, the  $S_{trans}$  in solution is considerably overestimated using the abovementioned equation since the volume available to the molecule movement in solution is much smaller than in gas phase. According to the method developed by Whitesides et al.,<sup>S2</sup> the free volume is used to correct translational entropy in solution. The rotational entropy is evaluated in a normal manner. Thermal correction and entropy contributions of vibration movements to the Gibbs energy are evaluated with the frequency calculation at 298.15 K and 1 atm.

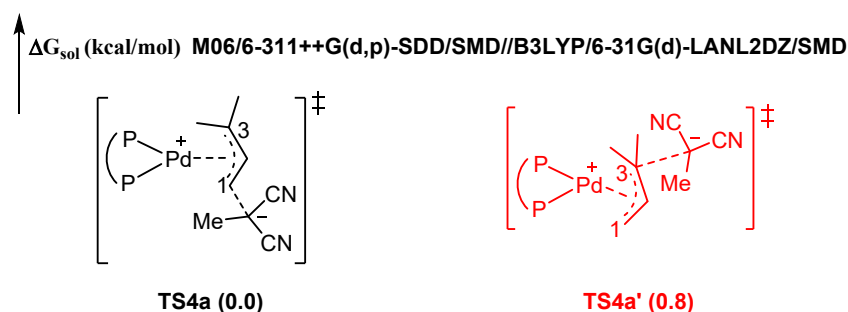

**Fig. S1** Comparisons between the transition states of the nucleophilic attack of carbon anion to  $C^1$  and  $C^3$  of allyl group. The numbers in parenthesis are  $\Delta\Delta G^\ddagger$  (in kcal/mol).

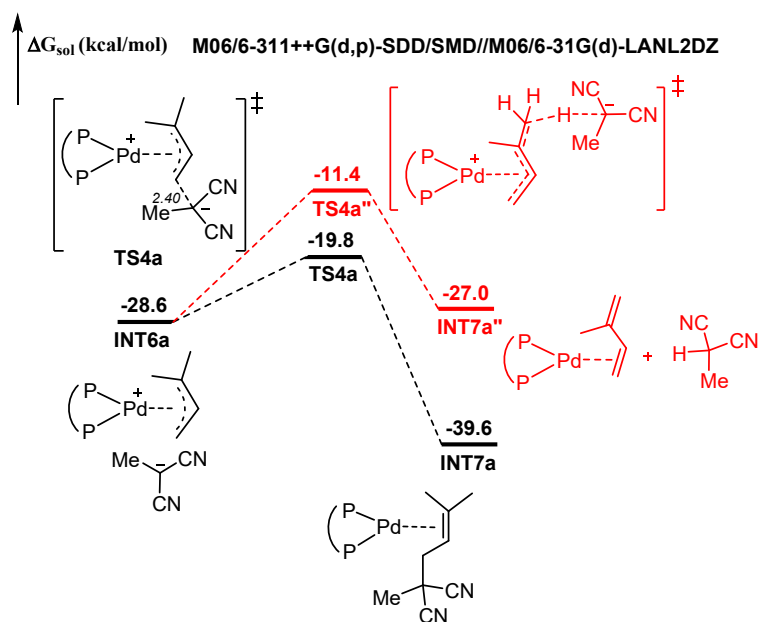

**Fig. S2** Energy profile for the deprotonation step by the carbon anion.

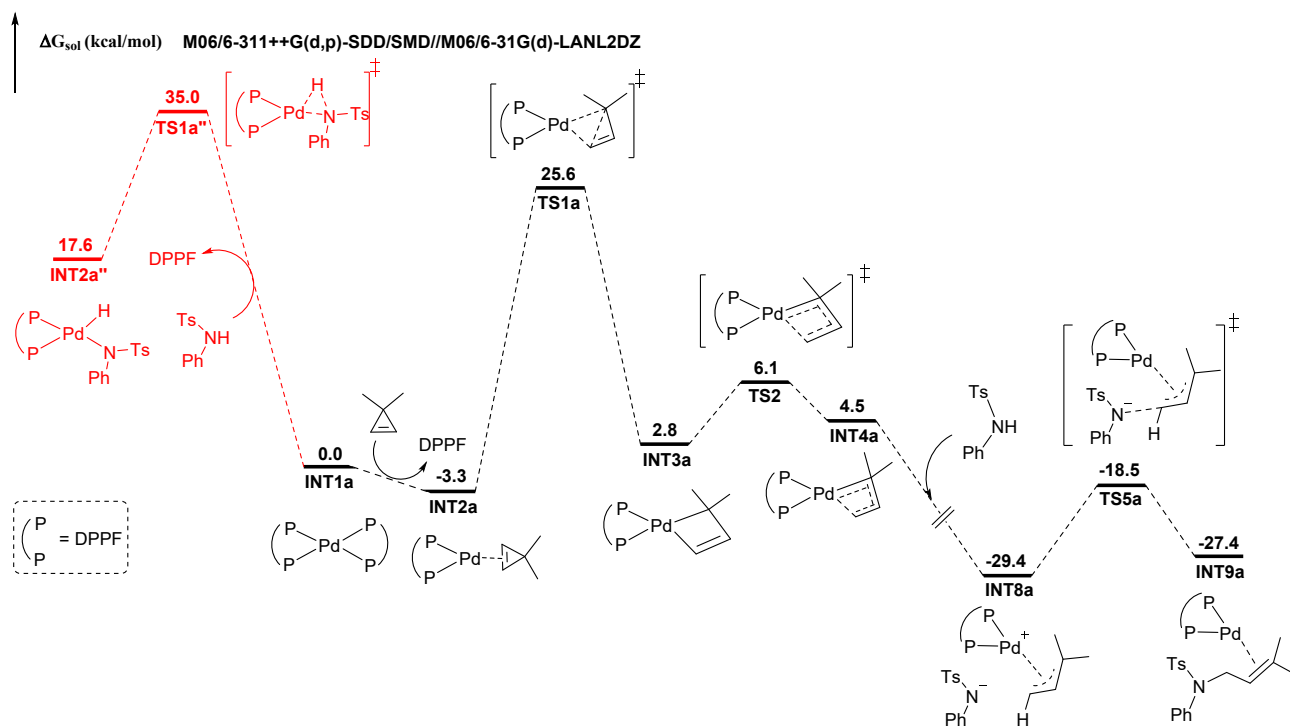

**Fig. S3** Energy profiles for the Pd-catalyzed hydroamination of **1a** with secondary amide **2b**.

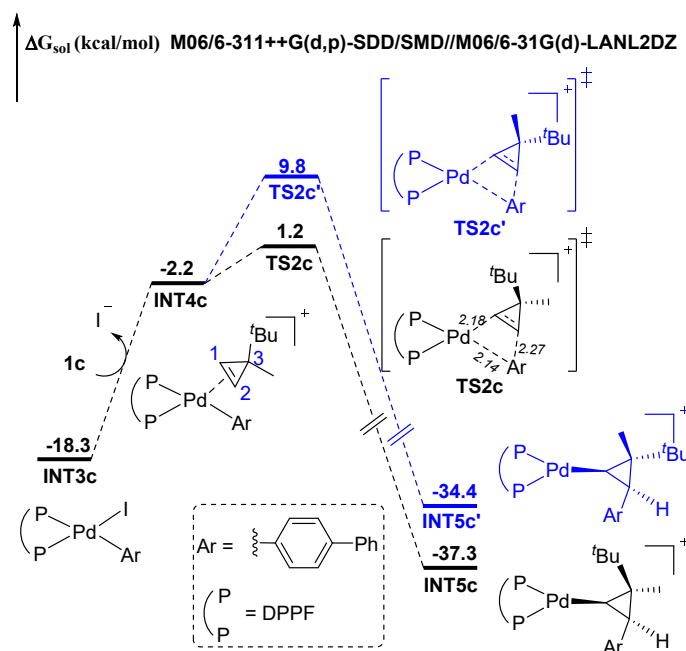

**Fig. S4** Energy profiles for two possible migratory insertions of **1c** into **INT3c**.

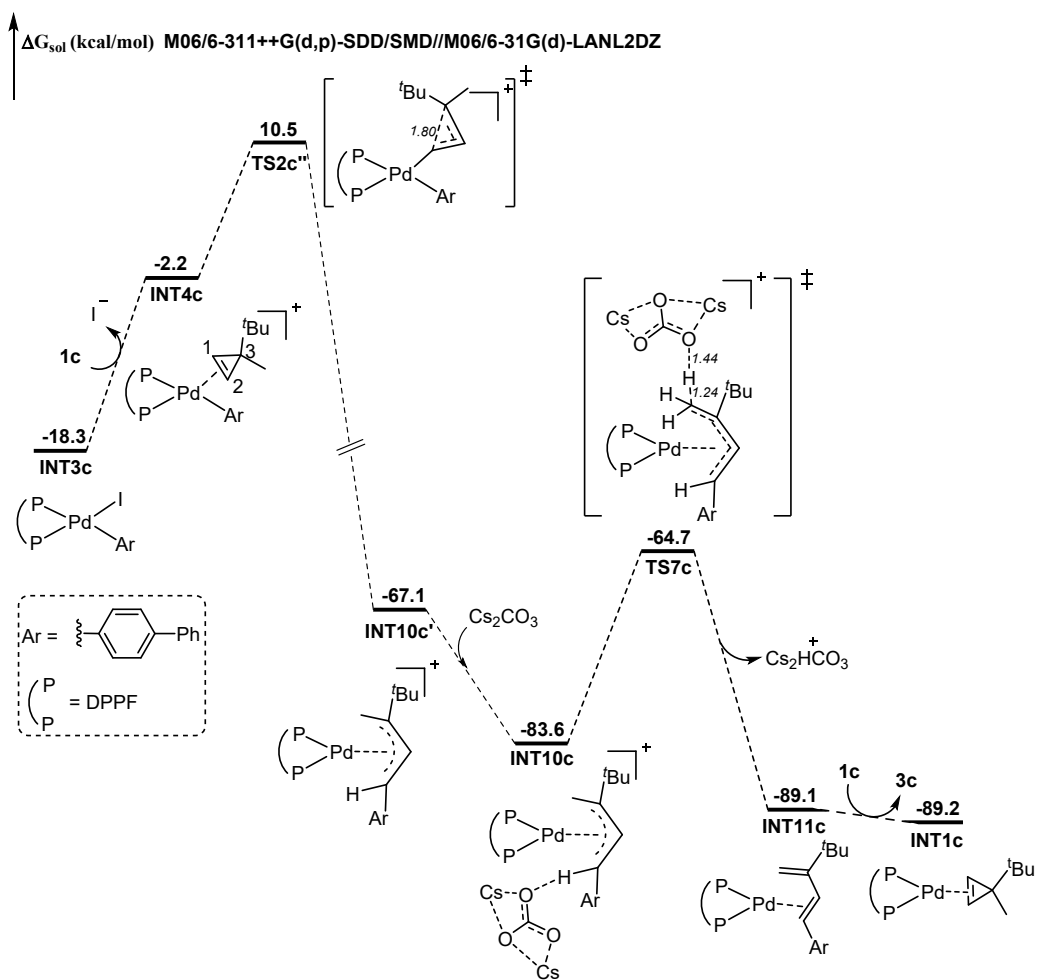

**Fig. S5** Energy profiles for ring-opening of **1c** via carbene path to further furnish **3c**.

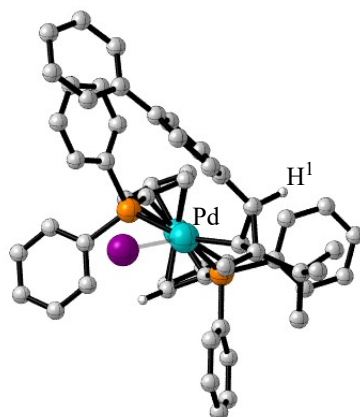

**INT6c**

**Fig. S6** 3D structure of **INT6c**. Some H atoms are omitted for clarity.

**Table S1.** Comparisons between  $\Delta\Delta G^\ddagger(\mathbf{TS3c})$  and  $\Delta\Delta G^\ddagger(\mathbf{TS3c}')$  using various density functionals (in kcal/mol).

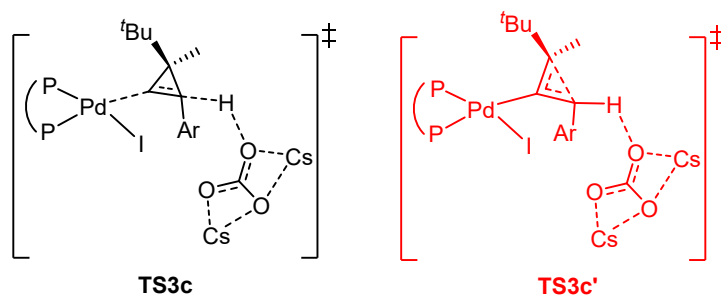

| Functional (optimizations in gas phase/<br>solvation single-point energy calculations) | $\Delta\Delta G^\ddagger(\mathbf{TS3c})$ | $\Delta\Delta G^\ddagger(\mathbf{TS3c}')$ |
|----------------------------------------------------------------------------------------|------------------------------------------|-------------------------------------------|
| M06/M06                                                                                | 0.0                                      | 2.5                                       |
| B3LYP/M06                                                                              | 0.0                                      | 2.3                                       |
| $\omega$ -B97XD/ $\omega$ -B97XD                                                       | 0.0                                      | 13.5                                      |
| M06-2X/M06-2X                                                                          | 0.0                                      | 3.5                                       |

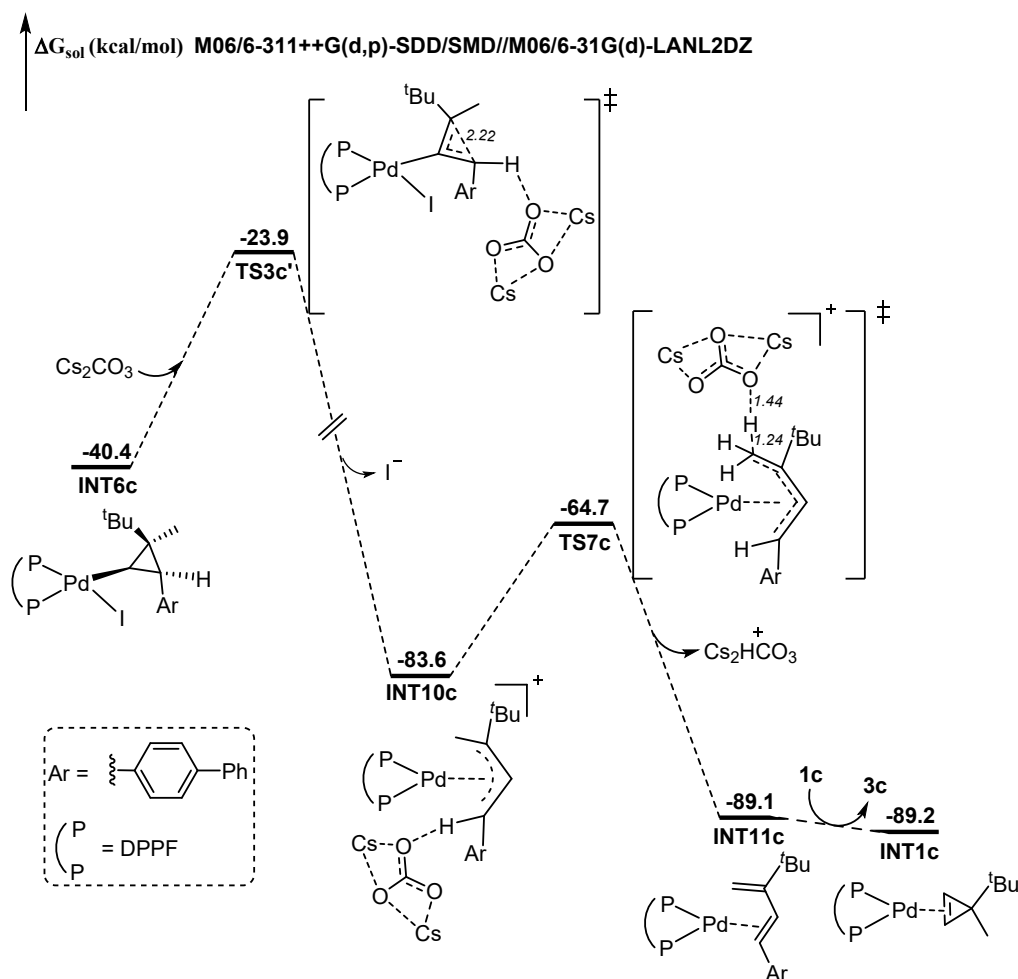

**Fig. S7** Energy profiles for the transformation from **INT6c** to product **3c** via cleavage of C<sup>2</sup>–C<sup>3</sup> bond followed by  $\beta$ -H elimination.

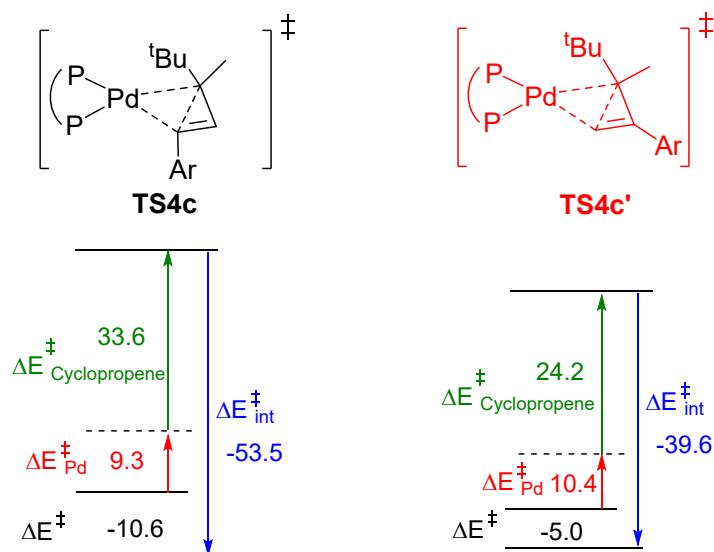

**Fig. S8** Distortion, interaction and activation energies for **TS4c** and **TS4c'** (green arrow: distortion energy of aryl cyclopropene; red arrow: distortion energy of the Pd complex; blue arrow: interaction energy; black: activation energy, in kcal/mol).

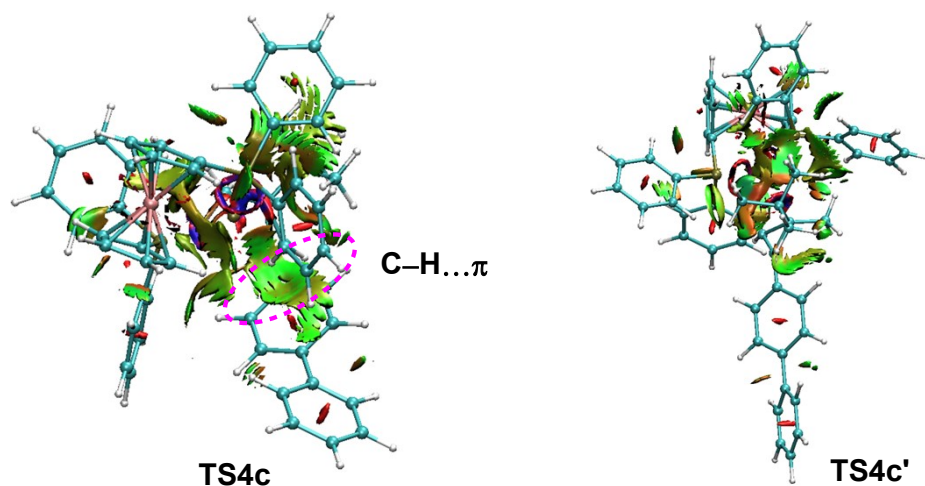

**Fig. S9** NCI analysis of TS4c and TS4c' with C-H... $\pi$  interactions highlighted by the pink circle.

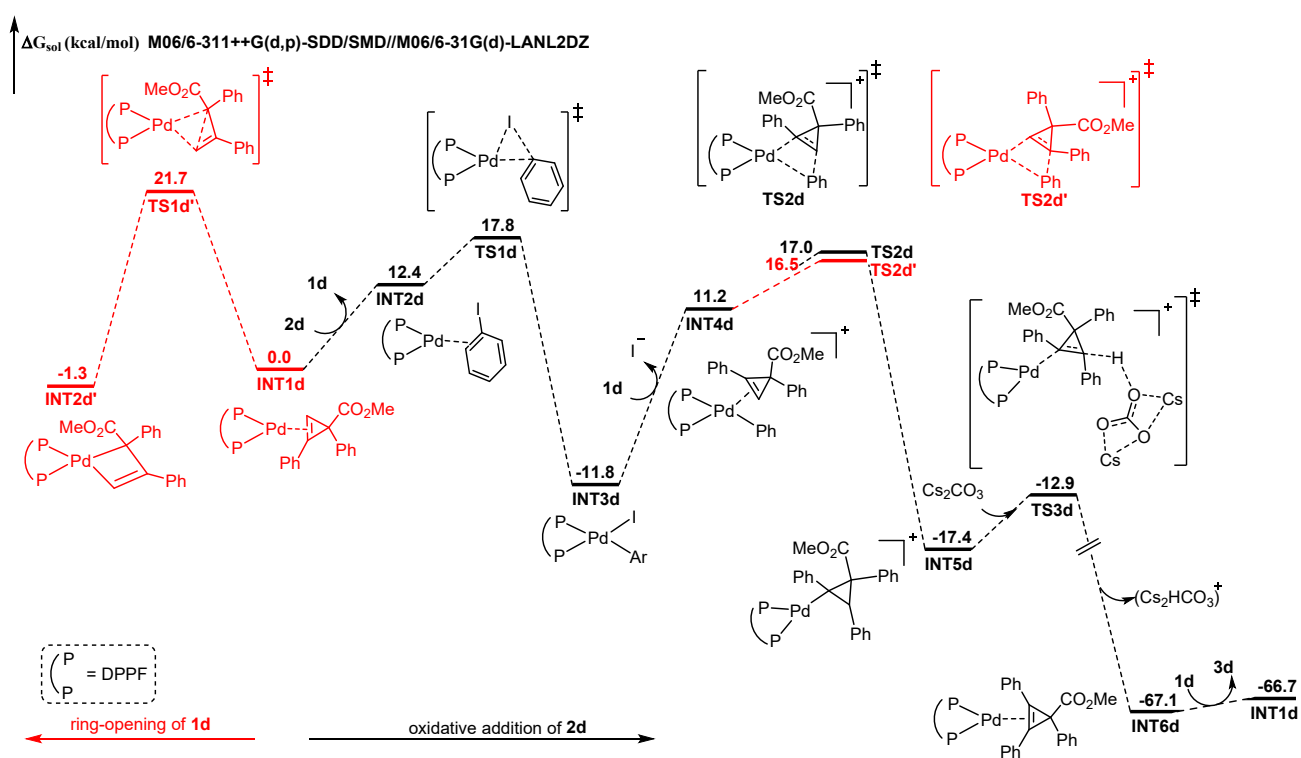

**Fig. S10** Energy profiles for the mechanistic pathways of control experiment shown in Scheme 3.

## References:

- S1) R. W. Gurney, *Introduction to Statistical Mechanics*, 1st ed.; McGraw-Hill Book Company: New York, 1949.
- S2) M. Mammen, E. I. Shakhnovich, J. M. Deutch and G. M. Whitesides, *J. Org. Chem.*, 1998, **63**, 3821.

## Cartesian Coordinates and Energies

1a

| Center Number | Atomic Number | Atomic Type | Coordinates (Angstroms) |           |           |
|---------------|---------------|-------------|-------------------------|-----------|-----------|
|               |               |             | X                       | Y         | Z         |
| 1             | 6             | 0           | -1.258931               | 0.000154  | 0.647200  |
| 2             | 6             | 0           | -1.258901               | 0.000032  | -0.647217 |
| 3             | 6             | 0           | 0.093226                | 0.000020  | 0.000033  |
| 4             | 1             | 0           | -1.805785               | -0.000243 | 1.581646  |
| 5             | 1             | 0           | -1.805512               | 0.000549  | -1.581800 |
| 6             | 6             | 0           | 0.933305                | -1.261791 | -0.000023 |
| 7             | 1             | 0           | 1.586890                | -1.302924 | -0.884273 |
| 8             | 6             | 0           | 0.933573                | 1.261634  | 0.000043  |
| 9             | 1             | 0           | 1.587432                | 1.302532  | 0.884096  |
| 10            | 1             | 0           | 0.305005                | 2.160784  | 0.000352  |
| 11            | 1             | 0           | 1.586910                | 1.302798  | -0.884388 |
| 12            | 1             | 0           | 1.586911                | -1.303005 | 0.884213  |
| 13            | 1             | 0           | 0.304522                | -2.160787 | -0.000059 |

Zero-point correction= 0.111802 (Hartree/Particle)  
Thermal correction to Energy= 0.117696  
Thermal correction to Enthalpy= 0.118640  
Thermal correction to Gibbs Free Energy= 0.083633  
Sum of electronic and zero-point Energies= -194.983028  
Sum of electronic and thermal Energies= -194.977134  
Sum of electronic and thermal Enthalpies= -194.976190  
Sum of electronic and thermal Free Energies= -195.011197  
M06/6-311++G(d,p)-SDD/SMD//m06/6-31G(d)-LANL2DZ energy in ethanol solvent = -588.069446

2a

| Center Number | Atomic Number | Atomic Type | Coordinates (Angstroms) |           |           |
|---------------|---------------|-------------|-------------------------|-----------|-----------|
|               |               |             | X                       | Y         | Z         |
| 1             | 6             | 0           | 0.000000                | 0.326321  | 0.445985  |
| 2             | 1             | 0           | -0.000043               | 0.444093  | 1.541092  |
| 3             | 6             | 0           | 0.000173                | 1.714121  | -0.214022 |
| 4             | 1             | 0           | 0.000147                | 1.618746  | -1.304238 |
| 5             | 1             | 0           | -0.891385               | 2.270942  | 0.090585  |
| 6             | 1             | 0           | 0.891887                | 2.270707  | 0.090564  |
| 7             | 6             | 0           | 1.207294                | -0.425282 | 0.084886  |
| 8             | 7             | 0           | 2.182934                | -0.981893 | -0.201983 |
| 9             | 6             | 0           | -1.207457               | -0.424942 | 0.084712  |
| 10            | 7             | 0           | -2.183029               | -0.981792 | -0.201927 |

Zero-point correction= 0.073178 (Hartree/Particle)  
Thermal correction to Energy= 0.079344  
Thermal correction to Enthalpy= 0.080288  
Thermal correction to Gibbs Free Energy= 0.043470  
Sum of electronic and zero-point Energies= -264.034111  
Sum of electronic and thermal Energies= -264.027945  
Sum of electronic and thermal Enthalpies= -264.027001  
Sum of electronic and thermal Free Energies= -264.063820  
M06/6-311++G(d,p)-SDD/SMD//m06/6-31G(d)-LANL2DZ energy in ethanol solvent = -264.1894569

DPPF

| Center Number | Atomic Number | Atomic Type | Coordinates (Angstroms) |           |           |
|---------------|---------------|-------------|-------------------------|-----------|-----------|
|               |               |             | X                       | Y         | Z         |
| 1             | 26            | 0           | 0.000032                | 0.000072  | 2.053489  |
| 2             | 15            | 0           | 1.920029                | 0.157831  | -0.846946 |
| 3             | 15            | 0           | -1.919999               | -0.157920 | -0.846937 |



|    |   |   |           |           |           |
|----|---|---|-----------|-----------|-----------|
| 4  | 6 | 0 | 4.268344  | 0.601682  | -2.264838 |
| 5  | 6 | 0 | 2.185748  | -1.668660 | -0.860472 |
| 6  | 6 | 0 | 1.279359  | -3.857354 | -1.375160 |
| 7  | 6 | 0 | 3.661553  | 0.749442  | -1.011299 |
| 8  | 6 | 0 | 2.445588  | -4.456097 | -0.908686 |
| 9  | 6 | 0 | 3.359035  | -2.280506 | -0.406662 |
| 10 | 6 | 0 | 1.153773  | -2.470694 | -1.358064 |
| 11 | 6 | 0 | 3.487096  | -3.665463 | -0.428789 |
| 12 | 6 | 0 | 4.376850  | 1.380371  | 0.009296  |
| 13 | 6 | 0 | 5.669068  | 1.849186  | -0.218629 |
| 14 | 6 | 0 | -1.638616 | -0.457545 | 0.930841  |
| 15 | 6 | 0 | -2.005573 | 0.339536  | 2.061828  |
| 16 | 6 | 0 | -2.185834 | 1.668582  | -0.860528 |
| 17 | 6 | 0 | 1.613534  | 0.349537  | 3.243129  |
| 18 | 6 | 0 | -1.015407 | -1.647592 | 1.436832  |
| 19 | 6 | 0 | -1.613450 | -0.349307 | 3.243143  |
| 20 | 6 | 0 | 5.560579  | 1.058363  | -2.488868 |
| 21 | 6 | 0 | -1.005271 | -1.579252 | 2.857111  |
| 22 | 6 | 0 | -1.153935 | 2.470672  | -1.358188 |
| 23 | 6 | 0 | 1.638662  | 0.457585  | 0.930835  |
| 24 | 6 | 0 | -3.359103 | 2.280400  | -0.406619 |
| 25 | 6 | 0 | 1.005384  | 1.579467  | 2.857020  |
| 26 | 6 | 0 | 2.005641  | -0.339411 | 2.061871  |
| 27 | 6 | 0 | 1.015460  | 1.647686  | 1.436746  |
| 28 | 6 | 0 | -3.661488 | -0.749572 | -1.011188 |
| 29 | 6 | 0 | -4.268324 | -0.601597 | -2.264667 |
| 30 | 6 | 0 | -3.487198 | 3.665356  | -0.428702 |
| 31 | 6 | 0 | -1.279566 | 3.857324  | -1.375279 |
| 32 | 6 | 0 | -2.445755 | 4.456036  | -0.908674 |
| 33 | 6 | 0 | 6.264303  | 1.687912  | -1.464485 |
| 34 | 6 | 0 | -5.668994 | -1.849426 | -0.218654 |
| 35 | 6 | 0 | -4.376769 | -1.380663 | 0.009321  |
| 36 | 6 | 0 | -6.264284 | -1.687926 | -1.464460 |
| 37 | 6 | 0 | -5.560588 | -1.058185 | -2.488743 |
| 38 | 1 | 0 | 0.577304  | 2.437085  | 0.831177  |
| 39 | 1 | 0 | 0.552929  | 2.303903  | 3.526838  |
| 40 | 1 | 0 | 1.699763  | -0.027432 | 4.257751  |
| 41 | 1 | 0 | 2.451730  | -1.328171 | 2.013727  |
| 42 | 1 | 0 | -0.577254 | -2.437015 | 0.831291  |
| 43 | 1 | 0 | -0.552767 | -2.303615 | 3.526975  |
| 44 | 1 | 0 | -1.699658 | 0.027749  | 4.257732  |
| 45 | 1 | 0 | -2.451660 | 1.328299  | 2.013606  |
| 46 | 1 | 0 | 0.243562  | -1.996239 | -1.731754 |
| 47 | 1 | 0 | 0.467909  | -4.470370 | -1.765094 |
| 48 | 1 | 0 | 2.548596  | -5.540087 | -0.928242 |
| 49 | 1 | 0 | 4.405817  | -4.130083 | -0.072874 |
| 50 | 1 | 0 | 4.181088  | -1.663605 | -0.039812 |
| 51 | 1 | 0 | 3.923561  | 1.507786  | 0.992728  |
| 52 | 1 | 0 | 6.213235  | 2.340816  | 0.586879  |
| 53 | 1 | 0 | 7.274684  | 2.054319  | -1.639744 |
| 54 | 1 | 0 | 6.019539  | 0.928801  | -3.468160 |
| 55 | 1 | 0 | 3.718993  | 0.115698  | -3.073741 |
| 56 | 1 | 0 | -4.181170 | 1.663496  | -0.039796 |
| 57 | 1 | 0 | -4.405911 | 4.129934  | -0.072717 |
| 58 | 1 | 0 | -2.548780 | 5.540024  | -0.928167 |
| 59 | 1 | 0 | -0.468164 | 4.470355  | -1.765296 |
| 60 | 1 | 0 | -0.243745 | 1.996245  | -1.731938 |
| 61 | 1 | 0 | -3.923484 | -1.508319 | 0.992714  |
| 62 | 1 | 0 | -6.213110 | -2.341224 | 0.586786  |
| 63 | 1 | 0 | -7.274670 | -2.054296 | -1.639760 |
| 64 | 1 | 0 | -6.019576 | -0.928441 | -3.467998 |
| 65 | 1 | 0 | -3.718996 | -0.115456 | -3.073493 |

-----  
Zero-point correction= 0.514075 (Hartree/Particle)  
Thermal correction to Energy= 0.545878  
Thermal correction to Enthalpy= 0.546822  
Thermal correction to Gibbs Free Energy= 0.448715

Sum of electronic and zero-point Energies= -2116.997467  
Sum of electronic and thermal Energies= -2116.965664  
Sum of electronic and thermal Enthalpies= -2116.964720  
Sum of electronic and thermal Free Energies= -2117.062827  
M06/6-311++G(d,p)-SDD/SMD//m06/6-31G(d)-LANL2DZ energy in ethanol solvent = -2118.4181578

**INT1a**

| Center<br>Number | Atomic<br>Number | Atomic<br>Type | Coordinates (Angstroms) |           |           |
|------------------|------------------|----------------|-------------------------|-----------|-----------|
|                  |                  |                | X                       | Y         | Z         |
| 1                | 26               | 0              | 4.176823                | -0.561376 | -1.060719 |
| 2                | 15               | 0              | 1.328455                | -2.003043 | 0.204013  |
| 3                | 15               | 0              | 1.936658                | 1.713510  | 0.404316  |
| 4                | 6                | 0              | -0.375791               | -4.204327 | 0.602801  |
| 5                | 6                | 0              | 2.177682                | -2.489871 | 1.775280  |
| 6                | 6                | 0              | 2.951119                | -1.811233 | 3.973674  |
| 7                | 6                | 0              | 0.554625                | -3.613523 | -0.264444 |
| 8                | 6                | 0              | 3.509958                | -3.070155 | 4.172384  |
| 9                | 6                | 0              | 2.727834                | -3.757610 | 1.993856  |
| 10               | 6                | 0              | 2.284123                | -1.531030 | 2.784554  |
| 11               | 6                | 0              | 3.391299                | -4.044465 | 3.183193  |
| 12               | 6                | 0              | 0.750583                | -4.187314 | -1.524372 |
| 13               | 6                | 0              | 0.029617                | -5.315004 | -1.910829 |
| 14               | 6                | 0              | 3.638336                | 1.152631  | -0.054501 |
| 15               | 6                | 0              | 4.297404                | 1.446275  | -1.294400 |
| 16               | 6                | 0              | 1.800321                | 3.220594  | -0.659935 |
| 17               | 6                | 0              | 4.790204                | -2.265737 | -1.988318 |
| 18               | 6                | 0              | 4.547058                | 0.341768  | 0.706781  |
| 19               | 6                | 0              | 5.597955                | 0.866263  | -1.274456 |
| 20               | 6                | 0              | -1.087178               | -5.334757 | 0.220016  |
| 21               | 6                | 0              | 5.753898                | 0.186659  | -0.034595 |
| 22               | 6                | 0              | 0.556704                | 3.495138  | -1.221490 |
| 23               | 6                | 0              | 2.744287                | -1.983923 | -0.944798 |
| 24               | 6                | 0              | 2.832910                | 4.151533  | -0.832312 |
| 25               | 6                | 0              | 3.956183                | -1.503831 | -2.857422 |
| 26               | 6                | 0              | 4.044589                | -2.572212 | -0.815578 |
| 27               | 6                | 0              | 2.699803                | -1.328070 | -2.218474 |
| 28               | 6                | 0              | 2.267544                | 2.587161  | 2.020051  |
| 29               | 6                | 0              | 2.898151                | 1.937289  | 3.087711  |
| 30               | 6                | 0              | 2.623191                | 5.303401  | -1.580740 |
| 31               | 6                | 0              | 0.337529                | 4.648936  | -1.971953 |
| 32               | 6                | 0              | 1.376954                | 5.552118  | -2.157356 |
| 33               | 6                | 0              | -0.890306               | -5.892134 | -1.042537 |
| 34               | 6                | 0              | 1.879918                | 4.477696  | 3.500885  |
| 35               | 6                | 0              | 1.756902                | 3.871502  | 2.254100  |
| 36               | 6                | 0              | 2.513717                | 3.818081  | 4.547855  |
| 37               | 6                | 0              | 3.026450                | 2.543503  | 4.332585  |
| 38               | 1                | 0              | 1.864649                | -0.742678 | -2.589519 |
| 39               | 1                | 0              | 4.246742                | -1.070085 | -3.809408 |
| 40               | 1                | 0              | 5.833486                | -2.513142 | -2.160830 |
| 41               | 1                | 0              | 4.418923                | -3.091593 | 0.061391  |
| 42               | 1                | 0              | 4.343792                | -0.140613 | 1.657442  |
| 43               | 1                | 0              | 6.609450                | -0.409914 | 0.266077  |
| 44               | 1                | 0              | 6.314062                | 0.884691  | -2.090052 |
| 45               | 1                | 0              | 3.855715                | 1.986141  | -2.126183 |
| 46               | 1                | 0              | 1.805911                | -0.559417 | 2.634210  |
| 47               | 1                | 0              | 3.017519                | -1.047951 | 4.749508  |
| 48               | 1                | 0              | 4.028055                | -3.298631 | 5.102715  |
| 49               | 1                | 0              | 3.816965                | -5.034851 | 3.339968  |
| 50               | 1                | 0              | 2.633315                | -4.527427 | 1.226313  |
| 51               | 1                | 0              | 1.472585                | -3.749661 | -2.213861 |
| 52               | 1                | 0              | 0.194080                | -5.746985 | -2.897201 |
| 53               | 1                | 0              | -1.452183               | -6.774690 | -1.344912 |
| 54               | 1                | 0              | -1.801618               | -5.781338 | 0.910864  |
| 55               | 1                | 0              | -0.553317               | -3.768732 | 1.588380  |
| 56               | 1                | 0              | 3.804031                | 3.979351  | -0.367542 |

|     |    |   |           |           |           |
|-----|----|---|-----------|-----------|-----------|
| 57  | 1  | 0 | 3.434456  | 6.018619  | -1.710724 |
| 58  | 1  | 0 | 1.219497  | 6.456692  | -2.743192 |
| 59  | 1  | 0 | -0.646899 | 4.829756  | -2.404982 |
| 60  | 1  | 0 | -0.249327 | 2.782102  | -1.058596 |
| 61  | 1  | 0 | 1.253752  | 4.413177  | 1.452500  |
| 62  | 1  | 0 | 1.481973  | 5.481736  | 3.649240  |
| 63  | 1  | 0 | 2.610925  | 4.294341  | 5.522022  |
| 64  | 1  | 0 | 3.534083  | 2.012954  | 5.137849  |
| 65  | 1  | 0 | 3.309744  | 0.940807  | 2.953087  |
| 66  | 26 | 0 | -3.970732 | -1.406557 | -0.800215 |
| 67  | 15 | 0 | -1.227810 | 0.279375  | -1.970888 |
| 68  | 15 | 0 | -1.993395 | 0.183941  | 1.637159  |
| 69  | 6  | 0 | 0.635157  | 1.026736  | -3.926607 |
| 70  | 6  | 0 | -2.232088 | 1.778768  | -2.397381 |
| 71  | 6  | 0 | -3.497922 | 3.692974  | -1.602466 |
| 72  | 6  | 0 | -0.280567 | 0.038928  | -3.534949 |
| 73  | 6  | 0 | -3.827703 | 4.028419  | -2.913120 |
| 74  | 6  | 0 | -2.567629 | 2.128235  | -3.709369 |
| 75  | 6  | 0 | -2.701976 | 2.579193  | -1.352418 |
| 76  | 6  | 0 | -3.359203 | 3.244834  | -3.964976 |
| 77  | 6  | 0 | -0.325178 | -1.156781 | -4.257952 |
| 78  | 6  | 0 | 0.529397  | -1.363842 | -5.338560 |
| 79  | 6  | 0 | -3.592113 | -0.487742 | 1.005198  |
| 80  | 6  | 0 | -4.007505 | -1.845375 | 1.185538  |
| 81  | 6  | 0 | -1.959643 | -0.752681 | 3.236835  |
| 82  | 6  | 0 | -4.468287 | -2.147226 | -2.628707 |
| 83  | 6  | 0 | -4.635205 | 0.172500  | 0.272397  |
| 84  | 6  | 0 | -5.298528 | -2.009562 | 0.607846  |
| 85  | 6  | 0 | 1.478501  | 0.823123  | -5.011833 |
| 86  | 6  | 0 | -5.690241 | -0.759915 | 0.048620  |
| 87  | 6  | 0 | -0.962362 | -1.712078 | 3.387713  |
| 88  | 6  | 0 | -2.519544 | -0.994251 | -2.153249 |
| 89  | 6  | 0 | -2.898643 | -0.595129 | 4.261112  |
| 90  | 6  | 0 | -3.585072 | -3.038985 | -1.952755 |
| 91  | 6  | 0 | -3.813558 | -0.891049 | -2.760567 |
| 92  | 6  | 0 | -2.388505 | -2.331645 | -1.655685 |
| 93  | 6  | 0 | -2.520114 | 1.855753  | 2.237547  |
| 94  | 6  | 0 | -3.834383 | 2.241852  | 2.525853  |
| 95  | 6  | 0 | -2.835164 | -1.389924 | 5.399854  |
| 96  | 6  | 0 | -0.896204 | -2.516955 | 4.522145  |
| 97  | 6  | 0 | -1.837567 | -2.355772 | 5.531880  |
| 98  | 6  | 0 | 1.432805  | -0.377733 | -5.719332 |
| 99  | 6  | 0 | -1.773546 | 4.075201  | 2.877301  |
| 100 | 6  | 0 | -1.497001 | 2.790651  | 2.422473  |
| 101 | 6  | 0 | -3.086030 | 4.452063  | 3.144628  |
| 102 | 6  | 0 | -4.114462 | 3.531180  | 2.970489  |
| 103 | 1  | 0 | -1.543470 | -2.704554 | -1.087446 |
| 104 | 1  | 0 | -3.811066 | -4.056159 | -1.648668 |
| 105 | 1  | 0 | -5.488718 | -2.366143 | -2.928782 |
| 106 | 1  | 0 | -4.242824 | 0.013065  | -3.182050 |
| 107 | 1  | 0 | -4.616155 | 1.202238  | -0.072593 |
| 108 | 1  | 0 | -6.600357 | -0.565465 | -0.510414 |
| 109 | 1  | 0 | -5.856650 | -2.939009 | 0.551030  |
| 110 | 1  | 0 | -3.413962 | -2.621777 | 1.662002  |
| 111 | 1  | 0 | -2.421394 | 2.338302  | -0.325163 |
| 112 | 1  | 0 | -3.846923 | 4.303009  | -0.769698 |
| 113 | 1  | 0 | -4.444120 | 4.902846  | -3.116881 |
| 114 | 1  | 0 | -3.611557 | 3.503648  | -4.992587 |
| 115 | 1  | 0 | -2.209654 | 1.517913  | -4.539375 |
| 116 | 1  | 0 | -1.025117 | -1.940516 | -3.967922 |
| 117 | 1  | 0 | 0.483562  | -2.303453 | -5.887735 |
| 118 | 1  | 0 | 2.099503  | -0.541491 | -6.564723 |
| 119 | 1  | 0 | 2.178761  | 1.604864  | -5.304509 |
| 120 | 1  | 0 | 0.691479  | 1.964261  | -3.368999 |
| 121 | 1  | 0 | -3.684897 | 0.154616  | 4.169077  |
| 122 | 1  | 0 | -3.571491 | -1.257018 | 6.191633  |
| 123 | 1  | 0 | -1.796471 | -2.976415 | 6.425972  |

|     |    |   |           |           |          |
|-----|----|---|-----------|-----------|----------|
| 124 | 1  | 0 | -0.102644 | -3.260269 | 4.610829 |
| 125 | 1  | 0 | -0.223357 | -1.815645 | 2.595910 |
| 126 | 1  | 0 | -0.467164 | 2.501202  | 2.201167 |
| 127 | 1  | 0 | -0.955910 | 4.780967  | 3.020908 |
| 128 | 1  | 0 | -3.307713 | 5.460941  | 3.489953 |
| 129 | 1  | 0 | -5.144354 | 3.814525  | 3.184845 |
| 130 | 1  | 0 | -4.651793 | 1.533380  | 2.396492 |
| 131 | 46 | 0 | 0.021003  | 0.085093  | 0.167612 |

-----  
Zero-point correction= 1.033949 (Hartree/Particle)  
Thermal correction to Energy= 1.099739  
Thermal correction to Enthalpy= 1.100683  
Thermal correction to Gibbs Free Energy= 0.934539  
Sum of electronic and zero-point Energies= -4360.864723  
Sum of electronic and thermal Energies= -4360.798934  
Sum of electronic and thermal Enthalpies= -4360.797990  
Sum of electronic and thermal Free Energies= -4360.964134  
M06/6-311++G(d,p)-SDD/SMD//m06/6-31G(d)-LANL2DZ energy in ethanol solvent = -4364.8615782

## INT2a

| Center<br>Number | Atomic<br>Number | Atomic<br>Type | Coordinates (Angstroms) |           |           |
|------------------|------------------|----------------|-------------------------|-----------|-----------|
|                  |                  |                | X                       | Y         | Z         |
| 1                | 26               | 0              | -0.341595               | -2.731906 | 0.598581  |
| 2                | 15               | 0              | 1.932176                | -0.239062 | -0.043911 |
| 3                | 15               | 0              | -2.053900               | 0.158190  | -0.111911 |
| 4                | 6                | 0              | 4.219857                | 1.283125  | 0.331636  |
| 5                | 6                | 0              | 2.605154                | -0.968887 | -1.595209 |
| 6                | 6                | 0              | 2.380868                | -1.281321 | -3.987923 |
| 7                | 6                | 0              | 3.489580                | 0.200166  | 0.836593  |
| 8                | 6                | 0              | 3.541717                | -2.048055 | -4.000861 |
| 9                | 6                | 0              | 3.777225                | -1.731917 | -1.621323 |
| 10               | 6                | 0              | 1.919552                | -0.740914 | -2.790884 |
| 11               | 6                | 0              | 4.241000                | -2.270084 | -2.816709 |
| 12               | 6                | 0              | 3.949502                | -0.445688 | 1.986245  |
| 13               | 6                | 0              | 5.115645                | -0.015101 | 2.616403  |
| 14               | 6                | 0              | -1.871620               | -1.657082 | -0.217689 |
| 15               | 6                | 0              | -2.378218               | -2.678271 | 0.648835  |
| 16               | 6                | 0              | -3.015958               | 0.321304  | 1.450313  |
| 17               | 6                | 0              | 0.993687                | -3.880309 | 1.617575  |
| 18               | 6                | 0              | -1.101299               | -2.311113 | -1.235019 |
| 19               | 6                | 0              | -1.921367               | -3.939937 | 0.170682  |
| 20               | 6                | 0              | 5.387733                | 1.704188  | 0.953044  |
| 21               | 6                | 0              | -1.139712               | -3.712931 | -0.998691 |
| 22               | 6                | 0              | -2.361485               | 0.808837  | 2.583996  |
| 23               | 6                | 0              | 1.405128                | -1.724774 | 0.875491  |
| 24               | 6                | 0              | -4.364150               | -0.037458 | 1.548083  |
| 25               | 6                | 0              | 0.336476                | -2.980720 | 2.505464  |
| 26               | 6                | 0              | 1.656006                | -3.111195 | 0.617972  |
| 27               | 6                | 0              | 0.584652                | -1.657126 | 2.049559  |
| 28               | 6                | 0              | -3.348947               | 0.478269  | -1.378909 |
| 29               | 6                | 0              | -4.067567               | -0.521558 | -2.039598 |
| 30               | 6                | 0              | -5.037320               | 0.077201  | 2.759406  |
| 31               | 6                | 0              | -3.032365               | 0.919015  | 3.798911  |
| 32               | 6                | 0              | -4.371289               | 0.551901  | 3.887090  |
| 33               | 6                | 0              | 5.836989                | 1.056515  | 2.102464  |
| 34               | 6                | 0              | -4.567612               | 2.152638  | -2.635370 |
| 35               | 6                | 0              | -3.601890               | 1.817791  | -1.694202 |
| 36               | 6                | 0              | -5.278461               | 1.149403  | -3.290539 |
| 37               | 6                | 0              | -5.024506               | -0.185647 | -2.993990 |
| 38               | 1                | 0              | 0.178579                | -0.743694 | 2.474749  |
| 39               | 1                | 0              | -0.295129               | -3.257652 | 3.343413  |
| 40               | 1                | 0              | 0.944229                | -4.964134 | 1.657025  |
| 41               | 1                | 0              | 2.199124                | -3.504307 | -0.236266 |
| 42               | 1                | 0              | -0.545260               | -1.809623 | -2.022302 |
| 43               | 1                | 0              | -0.606979               | -4.468529 | -1.567003 |

|    |    |   |           |           |           |
|----|----|---|-----------|-----------|-----------|
| 44 | 1  | 0 | -2.086895 | -4.899759 | 0.650384  |
| 45 | 1  | 0 | -2.957933 | -2.505813 | 1.550767  |
| 46 | 1  | 0 | 1.019132  | -0.121318 | -2.769619 |
| 47 | 1  | 0 | 1.838529  | -1.093464 | -4.913420 |
| 48 | 1  | 0 | 3.909943  | -2.465159 | -4.937079 |
| 49 | 1  | 0 | 5.155656  | -2.861384 | -2.826000 |
| 50 | 1  | 0 | 4.334904  | -1.897771 | -0.698231 |
| 51 | 1  | 0 | 3.398223  | -1.293173 | 2.393821  |
| 52 | 1  | 0 | 5.462920  | -0.526407 | 3.513363  |
| 53 | 1  | 0 | 6.747686  | 1.390285  | 2.597417  |
| 54 | 1  | 0 | 5.947206  | 2.544566  | 0.543600  |
| 55 | 1  | 0 | 3.862198  | 1.800026  | -0.562166 |
| 56 | 1  | 0 | -4.892302 | -0.407741 | 0.668183  |
| 57 | 1  | 0 | -6.087953 | -0.202629 | 2.823582  |
| 58 | 1  | 0 | -4.900576 | 0.643661  | 4.834420  |
| 59 | 1  | 0 | -2.510812 | 1.302237  | 4.674684  |
| 60 | 1  | 0 | -1.317776 | 1.118731  | 2.496460  |
| 61 | 1  | 0 | -3.025474 | 2.600964  | -1.194783 |
| 62 | 1  | 0 | -4.759841 | 3.199209  | -2.867483 |
| 63 | 1  | 0 | -6.027185 | 1.409435  | -4.037270 |
| 64 | 1  | 0 | -5.575204 | -0.973275 | -3.506716 |
| 65 | 1  | 0 | -3.877169 | -1.569911 | -1.806138 |
| 66 | 46 | 0 | 0.059691  | 1.133681  | -0.263600 |
| 67 | 6  | 0 | -0.011147 | 3.754749  | -1.107839 |
| 68 | 6  | 0 | -0.104840 | 5.019986  | -0.831076 |
| 69 | 6  | 0 | 0.535159  | 4.189501  | 0.231311  |
| 70 | 1  | 0 | -0.157952 | 2.953804  | -1.831367 |
| 71 | 1  | 0 | -0.396600 | 6.015645  | -1.142283 |
| 72 | 6  | 0 | 2.039793  | 4.249571  | 0.469498  |
| 73 | 6  | 0 | 2.872967  | 4.508669  | -0.770241 |
| 74 | 1  | 0 | 2.357603  | 3.297353  | 0.929352  |
| 75 | 1  | 0 | 2.242296  | 5.027764  | 1.225608  |
| 76 | 1  | 0 | 3.944332  | 4.520379  | -0.530096 |
| 77 | 1  | 0 | 2.704813  | 3.729755  | -1.529480 |
| 78 | 6  | 0 | -0.227713 | 3.870976  | 1.503065  |
| 79 | 1  | 0 | 0.112057  | 2.910281  | 1.925345  |
| 80 | 1  | 0 | -1.307787 | 3.796844  | 1.317239  |
| 81 | 1  | 0 | 2.623638  | 5.471791  | -1.236813 |
| 82 | 1  | 0 | -0.060036 | 4.643997  | 2.269545  |

-----

Zero-point correction= 0.656887 (Hartree/Particle)  
Thermal correction to Energy= 0.699293  
Thermal correction to Enthalpy= 0.700237  
Thermal correction to Gibbs Free Energy= 0.578136  
Sum of electronic and zero-point Energies= -2478.053846  
Sum of electronic and thermal Energies= -2478.011441  
Sum of electronic and thermal Enthalpies= -2478.010497  
Sum of electronic and thermal Free Energies= -2478.132597  
M06/6-311++G(d,p)-SDD/SMD//m06/6-31G(d)-LANL2DZ energy in ethanol solvent = -2441.5879472

### TS1a

-----

| Center<br>Number | Atomic<br>Number | Atomic<br>Type | Coordinates (Angstroms) |           |           |
|------------------|------------------|----------------|-------------------------|-----------|-----------|
|                  |                  |                | X                       | Y         | Z         |
| 1                | 26               | 0              | 0.019589                | -2.709291 | 0.549703  |
| 2                | 15               | 0              | 1.929741                | 0.031812  | -0.026043 |
| 3                | 15               | 0              | -1.913177               | 0.087852  | -0.112968 |
| 4                | 6                | 0              | 3.783577                | 2.004011  | 0.588489  |
| 5                | 6                | 0              | 2.734618                | -0.545849 | -1.578959 |
| 6                | 6                | 0              | 2.564589                | -0.878696 | -3.974669 |
| 7                | 6                | 0              | 3.367497                | 0.705019  | 0.904262  |
| 8                | 6                | 0              | 3.844551                | -1.423420 | -3.993311 |
| 9                | 6                | 0              | 4.025917                | -1.082013 | -1.612111 |
| 10               | 6                | 0              | 2.016166                | -0.437641 | -2.773331 |
| 11               | 6                | 0              | 4.575991                | -1.520834 | -2.811531 |
| 12               | 6                | 0              | 4.041176                | 0.001499  | 1.906264  |

|    |    |   |           |           |           |
|----|----|---|-----------|-----------|-----------|
| 13 | 6  | 0 | 5.110806  | 0.586848  | 2.579135  |
| 14 | 6  | 0 | -1.572627 | -1.704241 | -0.201532 |
| 15 | 6  | 0 | -2.009008 | -2.766703 | 0.654667  |
| 16 | 6  | 0 | -2.687885 | 0.219830  | 1.554978  |
| 17 | 6  | 0 | 1.503022  | -3.773227 | 1.452509  |
| 18 | 6  | 0 | -0.804010 | -2.301604 | -1.254450 |
| 19 | 6  | 0 | -1.506000 | -3.995045 | 0.138869  |
| 20 | 6  | 0 | 4.859286  | 2.581382  | 1.252148  |
| 21 | 6  | 0 | -0.766690 | -3.708024 | -1.044502 |
| 22 | 6  | 0 | -1.944283 | 0.810306  | 2.580649  |
| 23 | 6  | 0 | 1.648017  | -1.543423 | 0.845088  |
| 24 | 6  | 0 | -3.973945 | -0.251000 | 1.838427  |
| 25 | 6  | 0 | 0.780951  | -3.010644 | 2.415318  |
| 26 | 6  | 0 | 2.044112  | -2.873586 | 0.490691  |
| 27 | 6  | 0 | 0.865915  | -1.640436 | 2.043316  |
| 28 | 6  | 0 | -3.404099 | 0.170006  | -1.200416 |
| 29 | 6  | 0 | -3.980663 | -0.944486 | -1.816730 |
| 30 | 6  | 0 | -4.496253 | -0.144792 | 3.123079  |
| 31 | 6  | 0 | -2.464035 | 0.914678  | 3.867628  |
| 32 | 6  | 0 | -3.741927 | 0.436239  | 4.139702  |
| 33 | 6  | 0 | 5.522782  | 1.874431  | 2.252537  |
| 34 | 6  | 0 | -5.120601 | 1.565760  | -2.193205 |
| 35 | 6  | 0 | -3.984328 | 1.426461  | -1.406477 |
| 36 | 6  | 0 | -5.686884 | 0.449386  | -2.803886 |
| 37 | 6  | 0 | -5.112066 | -0.802479 | -2.616957 |
| 38 | 1  | 0 | 0.372752  | -0.810640 | 2.541984  |
| 39 | 1  | 0 | 0.209653  | -3.409054 | 3.247487  |
| 40 | 1  | 0 | 1.576676  | -4.855822 | 1.422276  |
| 41 | 1  | 0 | 2.602898  | -3.144483 | -0.400556 |
| 42 | 1  | 0 | -0.297809 | -1.760477 | -2.049285 |
| 43 | 1  | 0 | -0.213309 | -4.425704 | -1.641496 |
| 44 | 1  | 0 | -1.613740 | -4.970949 | 0.602301  |
| 45 | 1  | 0 | -2.566953 | -2.640431 | 1.577812  |
| 46 | 1  | 0 | 1.019037  | 0.010861  | -2.750176 |
| 47 | 1  | 0 | 1.994115  | -0.788981 | -4.897944 |
| 48 | 1  | 0 | 4.278076  | -1.765421 | -4.931961 |
| 49 | 1  | 0 | 5.582527  | -1.936615 | -2.826428 |
| 50 | 1  | 0 | 4.604929  | -1.151453 | -0.689778 |
| 51 | 1  | 0 | 3.728590  | -1.011467 | 2.162528  |
| 52 | 1  | 0 | 5.625578  | 0.031540  | 3.362232  |
| 53 | 1  | 0 | 6.358793  | 2.331045  | 2.780330  |
| 54 | 1  | 0 | 5.174634  | 3.591661  | 0.995328  |
| 55 | 1  | 0 | 3.243322  | 2.566588  | -0.176997 |
| 56 | 1  | 0 | -4.571596 | -0.702612 | 1.045167  |
| 57 | 1  | 0 | -5.499751 | -0.513483 | 3.331263  |
| 58 | 1  | 0 | -4.155843 | 0.523777  | 5.143184  |
| 59 | 1  | 0 | -1.873502 | 1.379542  | 4.655702  |
| 60 | 1  | 0 | -0.946718 | 1.195321  | 2.354559  |
| 61 | 1  | 0 | -3.535704 | 2.304197  | -0.940580 |
| 62 | 1  | 0 | -5.563043 | 2.550778  | -2.335451 |
| 63 | 1  | 0 | -6.573452 | 0.556676  | -3.426938 |
| 64 | 1  | 0 | -5.548742 | -1.680387 | -3.091522 |
| 65 | 1  | 0 | -3.549428 | -1.934830 | -1.671246 |
| 66 | 46 | 0 | 0.020370  | 1.499759  | -0.448987 |
| 67 | 6  | 0 | 0.932810  | 3.126365  | -1.509010 |
| 68 | 6  | 0 | 0.813697  | 4.395380  | -1.210435 |
| 69 | 6  | 0 | -0.174858 | 3.849350  | -0.265616 |
| 70 | 1  | 0 | 1.380213  | 2.571432  | -2.343767 |
| 71 | 1  | 0 | 1.113207  | 5.383497  | -1.551414 |
| 72 | 6  | 0 | 0.186712  | 3.911457  | 1.203852  |
| 73 | 1  | 0 | 1.191695  | 3.515831  | 1.396512  |
| 74 | 1  | 0 | -0.532570 | 3.372516  | 1.836299  |
| 75 | 6  | 0 | -1.614243 | 4.209783  | -0.554399 |
| 76 | 1  | 0 | -2.306967 | 3.691492  | 0.123892  |
| 77 | 1  | 0 | -1.889420 | 3.977401  | -1.590303 |
| 78 | 1  | 0 | 0.177556  | 4.969332  | 1.526976  |
| 79 | 1  | 0 | -1.757275 | 5.296725  | -0.404189 |

-----  
 Zero-point correction= 0.626965 (Hartree/Particle)  
 Thermal correction to Energy= 0.667292  
 Thermal correction to Enthalpy= 0.668236  
 Thermal correction to Gibbs Free Energy= 0.552337  
 Sum of electronic and zero-point Energies= -2438.787380  
 Sum of electronic and thermal Energies= -2438.747052  
 Sum of electronic and thermal Enthalpies= -2438.746108  
 Sum of electronic and thermal Free Energies= -2438.862007  
 M06/6-311++G(d,p)-SDD/SMD//m06/6-31G(d)-LANL2DZ energy in ethanol solvent = 2441.5382444

**INT3a**

-----

| Center<br>Number | Atomic<br>Number | Atomic<br>Type | Coordinates (Angstroms) |           |           |
|------------------|------------------|----------------|-------------------------|-----------|-----------|
|                  |                  |                | X                       | Y         | Z         |
| 1                | 26               | 0              | -0.342811               | 2.647912  | -0.911867 |
| 2                | 15               | 0              | -1.795015               | -0.257035 | -0.005129 |
| 3                | 15               | 0              | 1.804945                | 0.157437  | -0.003785 |
| 4                | 6                | 0              | -2.407554               | -1.889974 | 2.163840  |
| 5                | 6                | 0              | -3.080015               | -0.621147 | -1.264673 |
| 6                | 6                | 0              | -3.581101               | -1.347006 | -3.517699 |
| 7                | 6                | 0              | -2.607765               | -0.622563 | 1.603305  |
| 8                | 6                | 0              | -4.928410               | -1.071544 | -3.308673 |
| 9                | 6                | 0              | -4.436415               | -0.351879 | -1.060685 |
| 10               | 6                | 0              | -2.660576               | -1.128555 | -2.496196 |
| 11               | 6                | 0              | -5.356306               | -0.578438 | -2.077856 |
| 12               | 6                | 0              | -3.379185               | 0.313592  | 2.300082  |
| 13               | 6                | 0              | -3.946188               | -0.013401 | 3.527906  |
| 14               | 6                | 0              | 1.393493                | 1.622627  | -1.007365 |
| 15               | 6                | 0              | 1.646751                | 3.020130  | -0.809101 |
| 16               | 6                | 0              | 1.812820                | 0.746936  | 1.733001  |
| 17               | 6                | 0              | -2.036314               | 3.765341  | -0.736907 |
| 18               | 6                | 0              | 0.667871                | 1.498002  | -2.240283 |
| 19               | 6                | 0              | 1.073003                | 3.737379  | -1.895940 |
| 20               | 6                | 0              | -2.978870               | -2.214996 | 3.389772  |
| 21               | 6                | 0              | 0.468876                | 2.797793  | -2.779466 |
| 22               | 6                | 0              | 0.957323                | 0.099488  | 2.628765  |
| 23               | 6                | 0              | -1.821847               | 1.571586  | -0.028238 |
| 24               | 6                | 0              | 2.583378                | 1.822683  | 2.188025  |
| 25               | 6                | 0              | -1.307812               | 3.770322  | 0.486481  |
| 26               | 6                | 0              | -2.359594               | 2.415584  | -1.052919 |
| 27               | 6                | 0              | -1.165856               | 2.423657  | 0.922745  |
| 28               | 6                | 0              | 3.586451                | -0.066639 | -0.379583 |
| 29               | 6                | 0              | 4.052657                | 0.125195  | -1.684031 |
| 30               | 6                | 0              | 2.449554                | 2.277693  | 3.494870  |
| 31               | 6                | 0              | 0.821282                | 0.553410  | 3.937856  |
| 32               | 6                | 0              | 1.557742                | 1.652988  | 4.366409  |
| 33               | 6                | 0              | -3.747779               | -1.277880 | 4.074114  |
| 34               | 6                | 0              | 5.777908                | -0.877163 | 0.253226  |
| 35               | 6                | 0              | 4.462629                | -0.570667 | 0.586375  |
| 36               | 6                | 0              | 6.233422                | -0.682755 | -1.047070 |
| 37               | 6                | 0              | 5.368808                | -0.177848 | -2.013969 |
| 38               | 1                | 0              | -0.624561               | 2.090585  | 1.804611  |
| 39               | 1                | 0              | -0.875410               | 4.641111  | 0.968862  |
| 40               | 1                | 0              | -2.264566               | 4.633242  | -1.347437 |
| 41               | 1                | 0              | -2.877450               | 2.070321  | -1.943075 |
| 42               | 1                | 0              | 0.286171                | 0.560451  | -2.638580 |
| 43               | 1                | 0              | -0.096692               | 3.036859  | -3.674015 |
| 44               | 1                | 0              | 1.043048                | 4.817671  | -1.997565 |
| 45               | 1                | 0              | 2.121621                | 3.464868  | 0.059189  |
| 46               | 1                | 0              | -1.605825               | -1.375379 | -2.636059 |
| 47               | 1                | 0              | -3.244340               | -1.744179 | -4.473955 |
| 48               | 1                | 0              | -5.651364               | -1.247774 | -4.103823 |
| 49               | 1                | 0              | -6.412170               | -0.371067 | -1.909944 |
| 50               | 1                | 0              | -4.775429               | 0.036165  | -0.099285 |
| 51               | 1                | 0              | -3.529572               | 1.310172  | 1.883978  |

|    |    |   |           |           |           |
|----|----|---|-----------|-----------|-----------|
| 52 | 1  | 0 | -4.542860 | 0.725437  | 4.061066  |
| 53 | 1  | 0 | -4.189756 | -1.531369 | 5.036615  |
| 54 | 1  | 0 | -2.816549 | -3.204236 | 3.815112  |
| 55 | 1  | 0 | -1.786231 | -2.616023 | 1.633869  |
| 56 | 1  | 0 | 3.303663  | 2.295392  | 1.519191  |
| 57 | 1  | 0 | 3.045776  | 3.121817  | 3.838368  |
| 58 | 1  | 0 | 1.450598  | 2.018845  | 5.386454  |
| 59 | 1  | 0 | 0.133775  | 0.046968  | 4.614083  |
| 60 | 1  | 0 | 0.384004  | -0.762885 | 2.280742  |
| 61 | 1  | 0 | 4.114309  | -0.725260 | 1.608243  |
| 62 | 1  | 0 | 6.450083  | -1.270347 | 1.014365  |
| 63 | 1  | 0 | 7.262583  | -0.925187 | -1.306942 |
| 64 | 1  | 0 | 5.719895  | -0.022183 | -3.032881 |
| 65 | 1  | 0 | 3.378201  | 0.506250  | -2.451695 |
| 66 | 46 | 0 | 0.203445  | -1.615139 | -0.318979 |
| 67 | 6  | 0 | -0.763953 | -3.411912 | -0.630573 |
| 68 | 6  | 0 | 0.288831  | -4.223694 | -0.689353 |
| 69 | 6  | 0 | 1.475064  | -3.335086 | -0.457525 |
| 70 | 1  | 0 | -1.820369 | -3.661208 | -0.772191 |
| 71 | 1  | 0 | 0.352155  | -5.311247 | -0.873235 |
| 72 | 6  | 0 | 2.162958  | -3.578742 | 0.867538  |
| 73 | 1  | 0 | 1.448175  | -3.574672 | 1.702085  |
| 74 | 1  | 0 | 2.939120  | -2.824580 | 1.072676  |
| 75 | 6  | 0 | 2.443697  | -3.300423 | -1.616530 |
| 76 | 1  | 0 | 3.266465  | -2.587817 | -1.455130 |
| 77 | 1  | 0 | 1.940299  | -3.039178 | -2.557121 |
| 78 | 1  | 0 | 2.900925  | -4.301266 | -1.755059 |
| 79 | 1  | 0 | 2.664049  | -4.568198 | 0.865737  |

-----

Zero-point correction= 0.629481 (Hartree/Particle)  
Thermal correction to Energy= 0.669592  
Thermal correction to Enthalpy= 0.670536  
Thermal correction to Gibbs Free Energy= 0.556990  
Sum of electronic and zero-point Energies= -2438.819764  
Sum of electronic and thermal Energies= -2438.779654  
Sum of electronic and thermal Enthalpies= -2438.778709  
Sum of electronic and thermal Free Energies= -2438.892256  
M06/6-311++G(d,p)-SDD/SMD//m06/6-31G(d)-LANL2DZ energy in ethanol solvent = -2441.579118

### TS1a'

-----

| Center<br>Number | Atomic<br>Number | Atomic<br>Type | Coordinates (Angstroms) |           |           |
|------------------|------------------|----------------|-------------------------|-----------|-----------|
|                  |                  |                | X                       | Y         | Z         |
| 1                | 26               | 0              | -0.518578               | 2.632209  | -0.849973 |
| 2                | 15               | 0              | -1.975827               | -0.279564 | 0.147586  |
| 3                | 15               | 0              | 1.800795                | 0.315612  | 0.011269  |
| 4                | 6                | 0              | -3.351792               | -1.859183 | 1.981487  |
| 5                | 6                | 0              | -2.820187               | -0.724962 | -1.421304 |
| 6                | 6                | 0              | -2.676666               | -1.711770 | -3.628000 |
| 7                | 6                | 0              | -3.260511               | -0.580677 | 1.423997  |
| 8                | 6                | 0              | -4.015337               | -1.407892 | -3.853862 |
| 9                | 6                | 0              | -4.168229               | -0.433304 | -1.653281 |
| 10               | 6                | 0              | -2.083438               | -1.376421 | -2.414639 |
| 11               | 6                | 0              | -4.761576               | -0.771895 | -2.864292 |
| 12               | 6                | 0              | -4.145614               | 0.413556  | 1.853071  |
| 13               | 6                | 0              | -5.108965               | 0.128587  | 2.815827  |
| 14               | 6                | 0              | 1.263634                | 1.693044  | -1.050122 |
| 15               | 6                | 0              | 1.453138                | 3.105549  | -0.906157 |
| 16               | 6                | 0              | 2.312728                | 1.129197  | 1.568982  |
| 17               | 6                | 0              | -2.185358               | 3.756717  | -0.521690 |
| 18               | 6                | 0              | 0.450409                | 1.491963  | -2.215054 |
| 19               | 6                | 0              | 0.762080                | 3.758810  | -1.964981 |
| 20               | 6                | 0              | -4.320786               | -2.145043 | 2.936016  |
| 21               | 6                | 0              | 0.145782                | 2.762787  | -2.774974 |
| 22               | 6                | 0              | 1.631897                | 0.801517  | 2.743859  |
| 23               | 6                | 0              | -1.938116               | 1.536206  | 0.079422  |



|    |    |   |           |           |           |
|----|----|---|-----------|-----------|-----------|
| 24 | 6  | 0 | 3.368829  | 2.045557  | 1.624487  |
| 25 | 6  | 0 | -1.381952 | 3.708241  | 0.653218  |
| 26 | 6  | 0 | -2.536832 | 2.423132  | -0.874416 |
| 27 | 6  | 0 | -1.226096 | 2.345376  | 1.026387  |
| 28 | 6  | 0 | 3.393380  | -0.188309 | -0.741820 |
| 29 | 6  | 0 | 3.612838  | -0.068627 | -2.115753 |
| 30 | 6  | 0 | 3.709934  | 2.650137  | 2.828734  |
| 31 | 6  | 0 | 1.974543  | 1.405673  | 3.950449  |
| 32 | 6  | 0 | 3.008104  | 2.334990  | 3.990868  |
| 33 | 6  | 0 | -5.199375 | -1.150219 | 3.356465  |
| 34 | 6  | 0 | 5.486940  | -1.380221 | -0.534167 |
| 35 | 6  | 0 | 4.341180  | -0.850898 | 0.046947  |
| 36 | 6  | 0 | 5.700617  | -1.254758 | -1.903973 |
| 37 | 6  | 0 | 4.763705  | -0.595552 | -2.691875 |
| 38 | 1  | 0 | -0.623532 | 1.975813  | 1.852677  |
| 39 | 1  | 0 | -0.910275 | 4.555681  | 1.140063  |
| 40 | 1  | 0 | -2.433500 | 4.648852  | -1.087943 |
| 41 | 1  | 0 | -3.104585 | 2.118545  | -1.748678 |
| 42 | 1  | 0 | 0.089103  | 0.529617  | -2.569300 |
| 43 | 1  | 0 | -0.494606 | 2.943412  | -3.632068 |
| 44 | 1  | 0 | 0.667057  | 4.832460  | -2.093235 |
| 45 | 1  | 0 | 1.968931  | 3.595003  | -0.085973 |
| 46 | 1  | 0 | -1.038360 | -1.636304 | -2.223535 |
| 47 | 1  | 0 | -2.092698 | -2.220941 | -4.392660 |
| 48 | 1  | 0 | -4.483151 | -1.675599 | -4.799972 |
| 49 | 1  | 0 | -5.812825 | -0.544617 | -3.034876 |
| 50 | 1  | 0 | -4.760794 | 0.053011  | -0.876819 |
| 51 | 1  | 0 | -4.076544 | 1.418843  | 1.435807  |
| 52 | 1  | 0 | -5.790057 | 0.911179  | 3.146782  |
| 53 | 1  | 0 | -5.951320 | -1.369775 | 4.112685  |
| 54 | 1  | 0 | -4.383492 | -3.144885 | 3.362530  |
| 55 | 1  | 0 | -2.644594 | -2.628459 | 1.666008  |
| 56 | 1  | 0 | 3.935384  | 2.272117  | 0.719986  |
| 57 | 1  | 0 | 4.532987  | 3.362216  | 2.864517  |
| 58 | 1  | 0 | 3.280769  | 2.805579  | 4.934234  |
| 59 | 1  | 0 | 1.440538  | 1.138868  | 4.860712  |
| 60 | 1  | 0 | 0.836491  | 0.053375  | 2.707308  |
| 61 | 1  | 0 | 4.177413  | -0.965681 | 1.118544  |
| 62 | 1  | 0 | 6.215313  | -1.896642 | 0.088902  |
| 63 | 1  | 0 | 6.597085  | -1.674888 | -2.357285 |
| 64 | 1  | 0 | 4.922600  | -0.496833 | -3.764464 |
| 65 | 1  | 0 | 2.878823  | 0.433021  | -2.745537 |
| 66 | 46 | 0 | 0.082204  | -1.423301 | 0.320665  |
| 67 | 6  | 0 | 1.106879  | -3.467012 | 0.395613  |
| 68 | 1  | 0 | -0.419639 | -2.946774 | 0.523227  |
| 69 | 6  | 0 | 0.585026  | -4.899186 | 0.601311  |
| 70 | 1  | 0 | 1.408484  | -5.623526 | 0.548013  |
| 71 | 1  | 0 | 0.104264  | -4.987970 | 1.582115  |
| 72 | 1  | 0 | -0.150020 | -5.146309 | -0.172895 |
| 73 | 6  | 0 | 1.654574  | -3.286984 | -0.933526 |
| 74 | 7  | 0 | 2.031134  | -3.169609 | -2.031650 |
| 75 | 6  | 0 | 2.010320  | -3.078517 | 1.456815  |
| 76 | 7  | 0 | 2.698531  | -2.795015 | 2.355446  |

-----

Zero-point correction= 0.585509 (Hartree/Particle)  
Thermal correction to Energy= 0.626010  
Thermal correction to Enthalpy= 0.626955  
Thermal correction to Gibbs Free Energy= 0.511366  
Sum of electronic and zero-point Energies= -2507.829405  
Sum of electronic and thermal Energies= -2507.788903  
Sum of electronic and thermal Enthalpies= -2507.787959  
Sum of electronic and thermal Free Energies= -2507.903548  
M06/6-311++G(d,p)-SDD/SMD//m06/6-31G(d)-LANL2DZ energy in ethanol solvent = -2510.5686856

## INT2a'

-----

| Center | Atomic | Atomic | Coordinates (Angstroms) |
|--------|--------|--------|-------------------------|
|--------|--------|--------|-------------------------|

| Number | Number | Type | X         | Y         | Z         |
|--------|--------|------|-----------|-----------|-----------|
| 1      | 26     | 0    | -0.458313 | 2.257631  | -1.536038 |
| 2      | 15     | 0    | -1.883730 | -0.330482 | 0.100693  |
| 3      | 15     | 0    | 1.755377  | 0.199340  | 0.029706  |
| 4      | 6      | 0    | -2.443746 | -1.390780 | 2.610465  |
| 5      | 6      | 0    | -3.159197 | -1.016565 | -1.021354 |
| 6      | 6      | 0    | -3.684910 | -2.234105 | -3.042787 |
| 7      | 6      | 0    | -2.659516 | -0.300880 | 1.759906  |
| 8      | 6      | 0    | -5.032589 | -1.932231 | -2.875219 |
| 9      | 6      | 0    | -4.514251 | -0.715049 | -0.859790 |
| 10     | 6      | 0    | -2.751384 | -1.783886 | -2.113967 |
| 11     | 6      | 0    | -5.447217 | -1.177564 | -1.780349 |
| 12     | 6      | 0    | -3.439032 | 0.770225  | 2.208992  |
| 13     | 6      | 0    | -3.998050 | 0.745501  | 3.482842  |
| 14     | 6      | 0    | 1.309913  | 1.316208  | -1.334074 |
| 15     | 6      | 0    | 1.512715  | 2.723698  | -1.512865 |
| 16     | 6      | 0    | 1.618455  | 1.185346  | 1.566141  |
| 17     | 6      | 0    | -2.187887 | 3.325724  | -1.689182 |
| 18     | 6      | 0    | 0.626392  | 0.835322  | -2.500878 |
| 19     | 6      | 0    | 0.940165  | 3.100904  | -2.759360 |
| 20     | 6      | 0    | -3.005888 | -1.413741 | 3.882064  |
| 21     | 6      | 0    | 0.393094  | 1.935545  | -3.368129 |
| 22     | 6      | 0    | 0.764215  | 0.723150  | 2.569912  |
| 23     | 6      | 0    | -1.916284 | 1.418160  | -0.408602 |
| 24     | 6      | 0    | 2.305985  | 2.388799  | 1.760684  |
| 25     | 6      | 0    | -1.482331 | 3.687747  | -0.506468 |
| 26     | 6      | 0    | -2.462269 | 1.931392  | -1.631902 |
| 27     | 6      | 0    | -1.306662 | 2.518425  | 0.283020  |
| 28     | 6      | 0    | 3.563739  | 0.023783  | -0.196693 |
| 29     | 6      | 0    | 4.106464  | 0.001375  | -1.485143 |
| 30     | 6      | 0    | 2.090232  | 3.141763  | 2.908589  |
| 31     | 6      | 0    | 0.547971  | 1.475228  | 3.721512  |
| 32     | 6      | 0    | 1.200735  | 2.692262  | 3.884115  |
| 33     | 6      | 0    | -3.782636 | -0.344774 | 4.320071  |
| 34     | 6      | 0    | 5.767465  | -0.353886 | 0.719579  |
| 35     | 6      | 0    | 4.402910  | -0.165206 | 0.906291  |
| 36     | 6      | 0    | 6.303203  | -0.364277 | -0.564641 |
| 37     | 6      | 0    | 5.470874  | -0.189792 | -1.665829 |
| 38     | 1      | 0    | -0.778549 | 2.455475  | 1.230149  |
| 39     | 1      | 0    | -1.088592 | 4.671924  | -0.273957 |
| 40     | 1      | 0    | -2.428781 | 3.985096  | -2.516642 |
| 41     | 1      | 0    | -2.956541 | 1.343292  | -2.399422 |
| 42     | 1      | 0    | 0.310092  | -0.193876 | -2.655305 |
| 43     | 1      | 0    | -0.155512 | 1.902674  | -4.303466 |
| 44     | 1      | 0    | 0.873636  | 4.112852  | -3.146204 |
| 45     | 1      | 0    | 1.953116  | 3.402167  | -0.789741 |
| 46     | 1      | 0    | -1.696335 | -2.042235 | -2.220997 |
| 47     | 1      | 0    | -3.358509 | -2.831071 | -3.892588 |
| 48     | 1      | 0    | -5.764677 | -2.292767 | -3.596079 |
| 49     | 1      | 0    | -6.502814 | -0.948790 | -1.642931 |
| 50     | 1      | 0    | -4.841771 | -0.118477 | -0.007589 |
| 51     | 1      | 0    | -3.605773 | 1.632168  | 1.563427  |
| 52     | 1      | 0    | -4.602658 | 1.585061  | 3.822149  |
| 53     | 1      | 0    | -4.217767 | -0.359825 | 5.318005  |
| 54     | 1      | 0    | -2.828292 | -2.266308 | 4.535075  |
| 55     | 1      | 0    | -1.820104 | -2.218587 | 2.269053  |
| 56     | 1      | 0    | 3.028122  | 2.729411  | 1.018083  |
| 57     | 1      | 0    | 2.622270  | 4.081474  | 3.048540  |
| 58     | 1      | 0    | 1.030919  | 3.287000  | 4.780207  |
| 59     | 1      | 0    | -0.133918 | 1.105120  | 4.485878  |
| 60     | 1      | 0    | 0.256525  | -0.234325 | 2.440549  |
| 61     | 1      | 0    | 3.986831  | -0.184714 | 1.912637  |
| 62     | 1      | 0    | 6.411669  | -0.503476 | 1.584118  |
| 63     | 1      | 0    | 7.371873  | -0.517149 | -0.707835 |
| 64     | 1      | 0    | 5.882150  | -0.210655 | -2.673375 |
| 65     | 1      | 0    | 3.461725  | 0.114836  | -2.355371 |

|    |    |   |           |           |           |
|----|----|---|-----------|-----------|-----------|
| 66 | 46 | 0 | 0.084514  | -1.632689 | 0.065130  |
| 67 | 6  | 0 | 1.529947  | -3.253042 | 0.002729  |
| 68 | 1  | 0 | -1.001830 | -2.807710 | 0.109966  |
| 69 | 6  | 0 | 0.984478  | -4.683883 | 0.058954  |
| 70 | 1  | 0 | 1.796557  | -5.423957 | 0.006021  |
| 71 | 1  | 0 | 0.433011  | -4.838398 | 0.992486  |
| 72 | 1  | 0 | 0.297812  | -4.857981 | -0.776081 |
| 73 | 6  | 0 | 2.133343  | -2.944549 | -1.270385 |
| 74 | 7  | 0 | 2.534084  | -2.692466 | -2.338054 |
| 75 | 6  | 0 | 2.339362  | -2.935438 | 1.152624  |
| 76 | 7  | 0 | 2.922067  | -2.683431 | 2.132486  |

-----  
Zero-point correction= 0.587614 (Hartree/Particle)  
Thermal correction to Energy= 0.627976  
Thermal correction to Enthalpy= 0.628920  
Thermal correction to Gibbs Free Energy= 0.515264  
Sum of electronic and zero-point Energies= -2507.845942  
Sum of electronic and thermal Energies= -2507.805580  
Sum of electronic and thermal Enthalpies= -2507.804636  
Sum of electronic and thermal Free Energies= -2507.918292  
M06/6-311++G(d,p)-SDD/SMD//m06/6-31G(d)-LANL2DZ energy in ethanol solvent = -2510.5907784

## TS2a

| Center<br>Number | Atomic<br>Number | Atomic<br>Type | Coordinates (Angstroms) |           |           |
|------------------|------------------|----------------|-------------------------|-----------|-----------|
|                  |                  |                | X                       | Y         | Z         |
| 1                | 26               | 0              | -0.284816               | 2.528994  | -1.193423 |
| 2                | 15               | 0              | -1.790830               | -0.269141 | 0.028941  |
| 3                | 15               | 0              | 1.799887                | 0.123419  | 0.007005  |
| 4                | 6                | 0              | -2.473621               | -1.661653 | 2.331054  |
| 5                | 6                | 0              | -3.097778               | -0.749083 | -1.167641 |
| 6                | 6                | 0              | -3.659783               | -1.693796 | -3.323374 |
| 7                | 6                | 0              | -2.597754               | -0.431414 | 1.672993  |
| 8                | 6                | 0              | -4.999581               | -1.386040 | -3.111447 |
| 9                | 6                | 0              | -4.446211               | -0.444523 | -0.961790 |
| 10               | 6                | 0              | -2.712978               | -1.382661 | -2.351173 |
| 11               | 6                | 0              | -5.392889               | -0.765283 | -1.927849 |
| 12               | 6                | 0              | -3.293279               | 0.611296  | 2.294087  |
| 13               | 6                | 0              | -3.853240               | 0.429922  | 3.555047  |
| 14               | 6                | 0              | 1.444318                | 1.495206  | -1.133699 |
| 15               | 6                | 0              | 1.699581                | 2.902555  | -1.036399 |
| 16               | 6                | 0              | 1.755934                | 0.870911  | 1.683225  |
| 17               | 6                | 0              | -1.999365               | 3.627630  | -1.213395 |
| 18               | 6                | 0              | 0.771610                | 1.273818  | -2.382706 |
| 19               | 6                | 0              | 1.177981                | 3.532300  | -2.201130 |
| 20               | 6                | 0              | -3.039791               | -1.837825 | 3.589567  |
| 21               | 6                | 0              | 0.606201                | 2.526901  | -3.032510 |
| 22               | 6                | 0              | 0.839978                | 0.352229  | 2.602521  |
| 23               | 6                | 0              | -1.781731               | 1.545459  | -0.222052 |
| 24               | 6                | 0              | 2.557348                | 1.953695  | 2.063514  |
| 25               | 6                | 0              | -1.308516               | 3.800562  | 0.019701  |
| 26               | 6                | 0              | -2.295427               | 2.243843  | -1.362145 |
| 27               | 6                | 0              | -1.162539               | 2.523082  | 0.629383  |
| 28               | 6                | 0              | 3.592257                | -0.145510 | -0.266681 |
| 29               | 6                | 0              | 4.158757                | 0.053122  | -1.528454 |
| 30               | 6                | 0              | 2.401091                | 2.536987  | 3.315634  |
| 31               | 6                | 0              | 0.678821                | 0.937667  | 3.855488  |
| 32               | 6                | 0              | 1.452131                | 2.038793  | 4.207945  |
| 33               | 6                | 0              | -3.725170               | -0.794064 | 4.205225  |
| 34               | 6                | 0              | 5.705950                | -1.030002 | 0.514875  |
| 35               | 6                | 0              | 4.378646                | -0.691753 | 0.753483  |
| 36               | 6                | 0              | 6.262494                | -0.829776 | -0.745473 |
| 37               | 6                | 0              | 5.487117                | -0.285384 | -1.764835 |
| 38               | 1                | 0              | -0.638456               | 2.314810  | 1.559678  |
| 39               | 1                | 0              | -0.904729               | 4.733476  | 0.400198  |
| 40               | 1                | 0              | -2.215360               | 4.405081  | -1.939127 |

|    |    |   |           |           |           |
|----|----|---|-----------|-----------|-----------|
| 41 | 1  | 0 | -2.784340 | 1.777042  | -2.212483 |
| 42 | 1  | 0 | 0.404166  | 0.308461  | -2.723615 |
| 43 | 1  | 0 | 0.082077  | 2.695059  | -3.967605 |
| 44 | 1  | 0 | 1.159697  | 4.601085  | -2.390141 |
| 45 | 1  | 0 | 2.139762  | 3.410457  | -0.184448 |
| 46 | 1  | 0 | -1.664094 | -1.650374 | -2.494228 |
| 47 | 1  | 0 | -3.350458 | -2.189949 | -4.241946 |
| 48 | 1  | 0 | -5.742665 | -1.636134 | -3.867184 |
| 49 | 1  | 0 | -6.442697 | -0.532083 | -1.756185 |
| 50 | 1  | 0 | -4.756750 | 0.044310  | -0.037535 |
| 51 | 1  | 0 | -3.395303 | 1.574149  | 1.793153  |
| 52 | 1  | 0 | -4.389829 | 1.249402  | 4.031360  |
| 53 | 1  | 0 | -4.161232 | -0.933935 | 5.193628  |
| 54 | 1  | 0 | -2.938078 | -2.797767 | 4.093972  |
| 55 | 1  | 0 | -1.917356 | -2.468804 | 1.842260  |
| 56 | 1  | 0 | 3.317254  | 2.335027  | 1.380122  |
| 57 | 1  | 0 | 3.023460  | 3.384278  | 3.600043  |
| 58 | 1  | 0 | 1.327472  | 2.504680  | 5.184352  |
| 59 | 1  | 0 | -0.059623 | 0.530464  | 4.545317  |
| 60 | 1  | 0 | 0.238117  | -0.515701 | 2.323056  |
| 61 | 1  | 0 | 3.947398  | -0.848073 | 1.743638  |
| 62 | 1  | 0 | 6.308331  | -1.452653 | 1.317451  |
| 63 | 1  | 0 | 7.301283  | -1.096737 | -0.932681 |
| 64 | 1  | 0 | 5.918230  | -0.123928 | -2.751734 |
| 65 | 1  | 0 | 3.556211  | 0.471798  | -2.335189 |
| 66 | 46 | 0 | 0.203395  | -1.621315 | -0.165034 |
| 67 | 6  | 0 | -0.869967 | -3.458785 | -0.186060 |
| 68 | 6  | 0 | 0.225393  | -3.896343 | -0.890833 |
| 69 | 6  | 0 | 1.486831  | -3.369801 | -0.395561 |
| 70 | 1  | 0 | -1.842391 | -3.609778 | -0.677870 |
| 71 | 1  | 0 | 0.215810  | -4.422126 | -1.865939 |
| 72 | 6  | 0 | 1.935550  | -3.702376 | 1.009078  |
| 73 | 1  | 0 | 2.599598  | -2.927625 | 1.422039  |
| 74 | 1  | 0 | 2.518801  | -4.643506 | 0.993743  |
| 75 | 6  | 0 | 2.623356  | -3.315547 | -1.383739 |
| 76 | 1  | 0 | 3.467021  | -2.717610 | -1.013910 |
| 77 | 1  | 0 | 2.309477  | -2.899630 | -2.351563 |
| 78 | 1  | 0 | 1.084484  | -3.831354 | 1.684473  |
| 79 | 1  | 0 | 3.007535  | -4.335438 | -1.566982 |

-----  
Zero-point correction= 0.629624 (Hartree/Particle)  
Thermal correction to Energy= 0.669058  
Thermal correction to Enthalpy= 0.670002  
Thermal correction to Gibbs Free Energy= 0.558496  
Sum of electronic and zero-point Energies= -2438.815242  
Sum of electronic and thermal Energies= -2438.775809  
Sum of electronic and thermal Enthalpies= -2438.774865  
Sum of electronic and thermal Free Energies= -2438.886370  
M06/6-311++G(d,p)-SDD/SMD//m06/6-31G(d)-LANL2DZ energy in ethanol solvent = -2441.5754292

### TS2a'

| Center<br>Number | Atomic<br>Number | Atomic<br>Type | Coordinates (Angstroms) |           |           |
|------------------|------------------|----------------|-------------------------|-----------|-----------|
|                  |                  |                | X                       | Y         | Z         |
| 1                | 26               | 0              | -0.005075               | -2.473736 | -1.354097 |
| 2                | 15               | 0              | 1.858753                | -0.083786 | 0.218322  |
| 3                | 15               | 0              | -1.920089               | -0.061194 | 0.091390  |
| 4                | 6                | 0              | 3.312518                | 0.631962  | 2.472255  |
| 5                | 6                | 0              | 2.714910                | 0.621480  | -1.251992 |
| 6                | 6                | 0              | 2.587881                | 2.156365  | -3.126479 |
| 7                | 6                | 0              | 3.217221                | -0.306260 | 1.441551  |
| 8                | 6                | 0              | 3.874978                | 1.796717  | -3.513493 |
| 9                | 6                | 0              | 4.012231                | 0.277576  | -1.643052 |
| 10               | 6                | 0              | 2.015125                | 1.573208  | -1.999710 |
| 11               | 6                | 0              | 4.586814                | 0.859343  | -2.768733 |
| 12               | 6                | 0              | 4.131985                | -1.364745 | 1.401524  |

|    |    |   |           |           |           |
|----|----|---|-----------|-----------|-----------|
| 13 | 6  | 0 | 5.137847  | -1.461989 | 2.357340  |
| 14 | 6  | 0 | -1.611312 | -1.230835 | -1.277608 |
| 15 | 6  | 0 | -2.029711 | -2.595530 | -1.412958 |
| 16 | 6  | 0 | -2.887165 | -1.054236 | 1.286645  |
| 17 | 6  | 0 | 1.486496  | -3.858131 | -1.353770 |
| 18 | 6  | 0 | -0.775270 | -0.937719 | -2.407707 |
| 19 | 6  | 0 | -1.470320 | -3.122693 | -2.611012 |
| 20 | 6  | 0 | 4.321474  | 0.537552  | 3.425404  |
| 21 | 6  | 0 | -0.700613 | -2.097534 | -3.228619 |
| 22 | 6  | 0 | -2.397022 | -1.161709 | 2.590161  |
| 23 | 6  | 0 | 1.572187  | -1.813315 | -0.273652 |
| 24 | 6  | 0 | -4.089804 | -1.690010 | 0.952000  |
| 25 | 6  | 0 | 0.717401  | -3.962116 | -0.159122 |
| 26 | 6  | 0 | 2.021978  | -2.539235 | -1.423015 |
| 27 | 6  | 0 | 0.766067  | -2.706352 | 0.505953  |
| 28 | 6  | 0 | -3.163121 | 1.082812  | -0.638235 |
| 29 | 6  | 0 | -2.899682 | 1.679424  | -1.876549 |
| 30 | 6  | 0 | -4.774292 | -2.439990 | 1.900325  |
| 31 | 6  | 0 | -3.084070 | -1.915070 | 3.539489  |
| 32 | 6  | 0 | -4.267515 | -2.557486 | 3.193736  |
| 33 | 6  | 0 | 5.237983  | -0.507197 | 3.366008  |
| 34 | 6  | 0 | -5.111616 | 2.507450  | -0.418503 |
| 35 | 6  | 0 | -4.274679 | 1.519305  | 0.090480  |
| 36 | 6  | 0 | -4.850981 | 3.079615  | -1.659482 |
| 37 | 6  | 0 | -3.740275 | 2.662262  | -2.386723 |
| 38 | 1  | 0 | 0.241197  | -2.440217 | 1.419894  |
| 39 | 1  | 0 | 0.138180  | -4.825167 | 0.152678  |
| 40 | 1  | 0 | 1.596266  | -4.629058 | -2.110180 |
| 41 | 1  | 0 | 2.610728  | -2.125910 | -2.237219 |
| 42 | 1  | 0 | -0.229760 | -0.012792 | -2.573436 |
| 43 | 1  | 0 | -0.105168 | -2.198621 | -4.130143 |
| 44 | 1  | 0 | -1.562942 | -4.147157 | -2.957639 |
| 45 | 1  | 0 | -2.617728 | -3.148968 | -0.687790 |
| 46 | 1  | 0 | 1.012350  | 1.863011  | -1.671009 |
| 47 | 1  | 0 | 2.031153  | 2.901917  | -3.693303 |
| 48 | 1  | 0 | 4.330229  | 2.255287  | -4.390063 |
| 49 | 1  | 0 | 5.599535  | 0.585989  | -3.061623 |
| 50 | 1  | 0 | 4.585409  | -0.439790 | -1.054687 |
| 51 | 1  | 0 | 4.046691  | -2.129800 | 0.628127  |
| 52 | 1  | 0 | 5.842026  | -2.292007 | 2.319177  |
| 53 | 1  | 0 | 6.023661  | -0.588388 | 4.115736  |
| 54 | 1  | 0 | 4.383397  | 1.275246  | 4.223921  |
| 55 | 1  | 0 | 2.566666  | 1.425872  | 2.535746  |
| 56 | 1  | 0 | -4.497214 | -1.584191 | -0.054477 |
| 57 | 1  | 0 | -5.708594 | -2.931604 | 1.633096  |
| 58 | 1  | 0 | -4.805858 | -3.144554 | 3.936385  |
| 59 | 1  | 0 | -2.694829 | -1.992151 | 4.553334  |
| 60 | 1  | 0 | -1.480592 | -0.628316 | 2.854561  |
| 61 | 1  | 0 | -4.489711 | 1.084917  | 1.066617  |
| 62 | 1  | 0 | -5.974881 | 2.829958  | 0.161842  |
| 63 | 1  | 0 | -5.508373 | 3.851564  | -2.055999 |
| 64 | 1  | 0 | -3.524694 | 3.105646  | -3.357934 |
| 65 | 1  | 0 | -2.028485 | 1.372590  | -2.455935 |
| 66 | 46 | 0 | -0.044186 | 1.120739  | 0.944491  |
| 67 | 6  | 0 | -1.253758 | 2.447746  | 1.954826  |
| 68 | 6  | 0 | -0.917475 | 3.410314  | 0.954793  |
| 69 | 6  | 0 | 0.377562  | 3.856458  | 0.742637  |
| 70 | 1  | 0 | -2.350401 | 2.322617  | 2.001389  |
| 71 | 1  | 0 | -1.652988 | 3.727502  | 0.192309  |
| 72 | 6  | 0 | 1.434697  | 3.928805  | 1.801056  |
| 73 | 1  | 0 | 2.402140  | 3.554080  | 1.433765  |
| 74 | 6  | 0 | 0.719450  | 4.583013  | -0.519745 |
| 75 | 1  | 0 | 0.908784  | 5.650527  | -0.321239 |
| 76 | 1  | 0 | -0.078859 | 4.504927  | -1.270177 |
| 77 | 1  | 0 | 1.648181  | 4.183893  | -0.956596 |
| 78 | 1  | 0 | 1.597296  | 4.987837  | 2.068818  |
| 79 | 1  | 0 | 1.142999  | 3.377639  | 2.700188  |

-----  
Zero-point correction= 0.629818 (Hartree/Particle)  
Thermal correction to Energy= 0.669219  
Thermal correction to Enthalpy= 0.670163  
Thermal correction to Gibbs Free Energy= 0.557765  
Sum of electronic and zero-point Energies= -2438.796929  
Sum of electronic and thermal Energies= -2438.757528  
Sum of electronic and thermal Enthalpies= -2438.756584  
Sum of electronic and thermal Free Energies= -2438.868982  
M06/6-311++G(d,p)-SDD/SMD//m06/6-31G(d)-LANL2DZ energy in ethanol solvent = -2441.5579742

**INT4a**

-----

| Center<br>Number | Atomic<br>Number | Atomic<br>Type | Coordinates (Angstroms) |           |           |
|------------------|------------------|----------------|-------------------------|-----------|-----------|
|                  |                  |                | X                       | Y         | Z         |
| 1                | 26               | 0              | -0.314874               | 2.523753  | -1.152662 |
| 2                | 15               | 0              | -1.803949               | -0.304072 | 0.044008  |
| 3                | 15               | 0              | 1.810447                | 0.142857  | 0.006360  |
| 4                | 6                | 0              | -2.559070               | -1.649293 | 2.359319  |
| 5                | 6                | 0              | -3.039172               | -0.778880 | -1.230076 |
| 6                | 6                | 0              | -3.465176               | -1.617924 | -3.460223 |
| 7                | 6                | 0              | -2.703030               | -0.457888 | 1.638888  |
| 8                | 6                | 0              | -4.825731               | -1.379623 | -3.292706 |
| 9                | 6                | 0              | -4.407657               | -0.546879 | -1.068512 |
| 10               | 6                | 0              | -2.576589               | -1.326121 | -2.429539 |
| 11               | 6                | 0              | -5.296368               | -0.849664 | -2.093870 |
| 12               | 6                | 0              | -3.498590               | 0.569017  | 2.160158  |
| 13               | 6                | 0              | -4.138379               | 0.408796  | 3.384843  |
| 14               | 6                | 0              | 1.427687                | 1.511942  | -1.128896 |
| 15               | 6                | 0              | 1.667223                | 2.922686  | -1.035795 |
| 16               | 6                | 0              | 1.823311                | 0.896833  | 1.680136  |
| 17               | 6                | 0              | -2.029896               | 3.621923  | -1.113296 |
| 18               | 6                | 0              | 0.732229                | 1.283758  | -2.364170 |
| 19               | 6                | 0              | 1.114395                | 3.546517  | -2.189248 |
| 20               | 6                | 0              | -3.203058               | -1.802830 | 3.583638  |
| 21               | 6                | 0              | 0.537962                | 2.534919  | -3.009533 |
| 22               | 6                | 0              | 0.946968                | 0.375790  | 2.636514  |
| 23               | 6                | 0              | -1.790807               | 1.511792  | -0.189886 |
| 24               | 6                | 0              | 2.638323                | 1.980566  | 2.026671  |
| 25               | 6                | 0              | -1.321508               | 3.759479  | 0.114455  |
| 26               | 6                | 0              | -2.326983               | 2.242539  | -1.298803 |
| 27               | 6                | 0              | -1.164670               | 2.465124  | 0.683156  |
| 28               | 6                | 0              | 3.593294                | -0.142267 | -0.312779 |
| 29               | 6                | 0              | 4.123580                | 0.020243  | -1.595449 |
| 30               | 6                | 0              | 2.532891                | 2.565225  | 3.283392  |
| 31               | 6                | 0              | 0.840691                | 0.959902  | 3.896189  |
| 32               | 6                | 0              | 1.624287                | 2.064189  | 4.214597  |
| 33               | 6                | 0              | -3.989136               | -0.776562 | 4.099302  |
| 34               | 6                | 0              | 5.724030                | -1.022155 | 0.427588  |
| 35               | 6                | 0              | 4.406093                | -0.670023 | 0.696549  |
| 36               | 6                | 0              | 6.244906                | -0.855319 | -0.852554 |
| 37               | 6                | 0              | 5.442614                | -0.331852 | -1.862160 |
| 38               | 1                | 0              | -0.629180               | 2.230883  | 1.600915  |
| 39               | 1                | 0              | -0.912587               | 4.681453  | 0.515503  |
| 40               | 1                | 0              | -2.259012               | 4.420803  | -1.811309 |
| 41               | 1                | 0              | -2.825384               | 1.801484  | -2.157270 |
| 42               | 1                | 0              | 0.367798                | 0.314809  | -2.697151 |
| 43               | 1                | 0              | -0.006838               | 2.697115  | -3.933742 |
| 44               | 1                | 0              | 1.079750                | 4.615070  | -2.377161 |
| 45               | 1                | 0              | 2.118198                | 3.436996  | -0.193507 |
| 46               | 1                | 0              | -1.511069               | -1.538499 | -2.542259 |
| 47               | 1                | 0              | -3.094156               | -2.043451 | -4.391374 |
| 48               | 1                | 0              | -5.523467               | -1.615231 | -4.094872 |
| 49               | 1                | 0              | -6.362150               | -0.672991 | -1.956433 |
| 50               | 1                | 0              | -4.780912               | -0.130455 | -0.132206 |
| 51               | 1                | 0              | -3.613551               | 1.503822  | 1.610620  |

|    |    |   |           |           |           |
|----|----|---|-----------|-----------|-----------|
| 52 | 1  | 0 | -4.753497 | 1.214668  | 3.782948  |
| 53 | 1  | 0 | -4.485899 | -0.898871 | 5.061025  |
| 54 | 1  | 0 | -3.085024 | -2.732363 | 4.138846  |
| 55 | 1  | 0 | -1.930500 | -2.445293 | 1.943963  |
| 56 | 1  | 0 | 3.371183  | 2.360465  | 1.313736  |
| 57 | 1  | 0 | 3.164620  | 3.413974  | 3.541440  |
| 58 | 1  | 0 | 1.539548  | 2.529111  | 5.195687  |
| 59 | 1  | 0 | 0.140501  | 0.549104  | 4.622194  |
| 60 | 1  | 0 | 0.338198  | -0.494887 | 2.379640  |
| 61 | 1  | 0 | 4.003090  | -0.801955 | 1.701926  |
| 62 | 1  | 0 | 6.347332  | -1.429165 | 1.222262  |
| 63 | 1  | 0 | 7.276593  | -1.132337 | -1.062944 |
| 64 | 1  | 0 | 5.845778  | -0.196667 | -2.864666 |
| 65 | 1  | 0 | 3.499934  | 0.421421  | -2.395053 |
| 66 | 46 | 0 | 0.217027  | -1.609585 | -0.098876 |
| 67 | 6  | 0 | -0.860798 | -3.464557 | 0.010511  |
| 68 | 6  | 0 | 0.221409  | -3.839502 | -0.770267 |
| 69 | 6  | 0 | 1.509887  | -3.380565 | -0.311587 |
| 70 | 1  | 0 | -1.828277 | -3.589364 | -0.502327 |
| 71 | 1  | 0 | 0.165458  | -4.264103 | -1.791427 |
| 72 | 6  | 0 | 1.970565  | -3.662151 | 1.098195  |
| 73 | 1  | 0 | 2.631747  | -2.870440 | 1.482111  |
| 74 | 1  | 0 | 2.562260  | -4.597310 | 1.104667  |
| 75 | 6  | 0 | 2.630257  | -3.357170 | -1.316938 |
| 76 | 1  | 0 | 3.465398  | -2.723451 | -0.990143 |
| 77 | 1  | 0 | 2.295618  | -2.998982 | -2.300459 |
| 78 | 1  | 0 | 3.035046  | -4.376188 | -1.448921 |
| 79 | 1  | 0 | 1.123563  | -3.777725 | 1.780842  |

-----

Zero-point correction= 0.629534 (Hartree/Particle)  
Thermal correction to Energy= 0.669760  
Thermal correction to Enthalpy= 0.670705  
Thermal correction to Gibbs Free Energy= 0.556832  
Sum of electronic and zero-point Energies= -2438.815277  
Sum of electronic and thermal Energies= -2438.775051  
Sum of electronic and thermal Enthalpies= -2438.774107  
Sum of electronic and thermal Free Energies= -2438.887980  
M06/6-311++G(d,p)-SDD/SMD//m06/6-31G(d)-LANL2DZ energy in ethanol solvent = -2441.5763382

#### INT4a'

-----

| Center<br>Number | Atomic<br>Number | Atomic<br>Type | Coordinates (Angstroms) |           |           |
|------------------|------------------|----------------|-------------------------|-----------|-----------|
|                  |                  |                | X                       | Y         | Z         |
| 1                | 26               | 0              | -0.795630               | -2.154478 | 1.595508  |
| 2                | 15               | 0              | -1.945508               | 0.464936  | -0.237605 |
| 3                | 15               | 0              | 1.632509                | -0.524608 | -0.107833 |
| 4                | 6                | 0              | -3.110285               | 1.497880  | -2.541710 |
| 5                | 6                | 0              | -2.771390               | 1.443316  | 1.086724  |
| 6                | 6                | 0              | -2.547543               | 2.977045  | 2.949025  |
| 7                | 6                | 0              | -3.195415               | 0.477578  | -1.588808 |
| 8                | 6                | 0              | -3.917772               | 2.906960  | 3.177869  |
| 9                | 6                | 0              | -4.149444               | 1.388770  | 1.318258  |
| 10               | 6                | 0              | -1.980728               | 2.253498  | 1.903722  |
| 11               | 6                | 0              | -4.718811               | 2.115884  | 2.357705  |
| 12               | 6                | 0              | -4.212013               | -0.475957 | -1.701451 |
| 13               | 6                | 0              | -5.133778               | -0.402776 | -2.741377 |
| 14               | 6                | 0              | 1.074371                | -1.427462 | 1.368090  |
| 15               | 6                | 0              | 1.116295                | -2.824135 | 1.688536  |
| 16               | 6                | 0              | 1.977234                | -1.856565 | -1.322299 |
| 17               | 6                | 0              | -2.604981               | -3.078552 | 1.738612  |
| 18               | 6                | 0              | 0.403510                | -0.765317 | 2.449800  |
| 19               | 6                | 0              | 0.469346                | -3.013309 | 2.943130  |
| 20               | 6                | 0              | -4.037638               | 1.574519  | -3.575199 |
| 21               | 6                | 0              | 0.032770                | -1.741935 | 3.414519  |
| 22               | 6                | 0              | 1.220623                | -1.904380 | -2.495664 |
| 23               | 6                | 0              | -2.160940               | -1.230229 | 0.414524  |

|    |    |   |           |           |           |
|----|----|---|-----------|-----------|-----------|
| 24 | 6  | 0 | 2.982629  | -2.807159 | -1.117806 |
| 25 | 6  | 0 | -1.908819 | -3.528118 | 0.580394  |
| 26 | 6  | 0 | -2.768709 | -1.667513 | 1.635956  |
| 27 | 6  | 0 | -1.631281 | -2.394925 | -0.233296 |
| 28 | 6  | 0 | 3.325827  | -0.008048 | 0.382090  |
| 29 | 6  | 0 | 3.838462  | -0.180088 | 1.672055  |
| 30 | 6  | 0 | 3.205627  | -3.806157 | -2.058678 |
| 31 | 6  | 0 | 1.444034  | -2.904651 | -3.438212 |
| 32 | 6  | 0 | 2.433490  | -3.857527 | -3.217312 |
| 33 | 6  | 0 | -5.049448 | 0.623665  | -3.677318 |
| 34 | 6  | 0 | 5.342998  | 1.184915  | -0.232454 |
| 35 | 6  | 0 | 4.093136  | 0.678988  | -0.566085 |
| 36 | 6  | 0 | 5.837689  | 1.027931  | 1.060473  |
| 37 | 6  | 0 | 5.084966  | 0.341088  | 2.008460  |
| 38 | 1  | 0 | -1.063835 | -2.399261 | -1.160759 |
| 39 | 1  | 0 | -1.586594 | -4.545507 | 0.383170  |
| 40 | 1  | 0 | -2.906018 | -3.693466 | 2.580865  |
| 41 | 1  | 0 | -3.215829 | -1.018036 | 2.382571  |
| 42 | 1  | 0 | 0.171642  | 0.296526  | 2.483373  |
| 43 | 1  | 0 | -0.538979 | -1.557438 | 4.318112  |
| 44 | 1  | 0 | 0.285019  | -3.968950 | 3.424193  |
| 45 | 1  | 0 | 1.505361  | -3.607577 | 1.045265  |
| 46 | 1  | 0 | -0.910863 | 2.326546  | 1.699046  |
| 47 | 1  | 0 | -1.918434 | 3.605475  | 3.577704  |
| 48 | 1  | 0 | -4.365995 | 3.476850  | 3.990431  |
| 49 | 1  | 0 | -5.793712 | 2.068426  | 2.526454  |
| 50 | 1  | 0 | -4.782902 | 0.773716  | 0.677538  |
| 51 | 1  | 0 | -4.281623 | -1.283823 | -0.971566 |
| 52 | 1  | 0 | -5.919604 | -1.152642 | -2.822463 |
| 53 | 1  | 0 | -5.770239 | 0.679513  | -4.491864 |
| 54 | 1  | 0 | -3.962180 | 2.374131  | -4.310703 |
| 55 | 1  | 0 | -2.297980 | 2.224135  | -2.467408 |
| 56 | 1  | 0 | 3.600159  | -2.755322 | -0.219455 |
| 57 | 1  | 0 | 3.989651  | -4.543725 | -1.893130 |
| 58 | 1  | 0 | 2.612193  | -4.637399 | -3.956121 |
| 59 | 1  | 0 | 0.850200  | -2.932159 | -4.350448 |
| 60 | 1  | 0 | 0.461412  | -1.135858 | -2.665057 |
| 61 | 1  | 0 | 3.691964  | 0.835926  | -1.568771 |
| 62 | 1  | 0 | 5.923997  | 1.722696  | -0.981131 |
| 63 | 1  | 0 | 6.811105  | 1.436809  | 1.327271  |
| 64 | 1  | 0 | 5.471977  | 0.204385  | 3.017388  |
| 65 | 1  | 0 | 3.259206  | -0.718624 | 2.422448  |
| 66 | 46 | 0 | 0.228374  | 1.203708  | -0.922922 |
| 67 | 6  | 0 | 1.365742  | 2.500933  | -1.947630 |
| 68 | 6  | 0 | 2.414935  | 3.399077  | -1.588133 |
| 69 | 6  | 0 | 2.748927  | 3.767769  | -0.313161 |
| 70 | 1  | 0 | 1.498380  | 2.216176  | -3.007509 |
| 71 | 1  | 0 | 3.054739  | 3.822357  | -2.376101 |
| 72 | 6  | 0 | 2.010028  | 3.309327  | 0.892983  |
| 73 | 1  | 0 | 2.469098  | 2.396066  | 1.310606  |
| 74 | 6  | 0 | 3.937155  | 4.629545  | -0.052563 |
| 75 | 1  | 0 | 3.657986  | 5.524485  | 0.524997  |
| 76 | 1  | 0 | 4.432591  | 4.949914  | -0.977393 |
| 77 | 1  | 0 | 4.674735  | 4.087575  | 0.562744  |
| 78 | 1  | 0 | 2.033804  | 4.072808  | 1.684154  |
| 79 | 1  | 0 | 0.970947  | 3.052933  | 0.631683  |

-----  
Zero-point correction= 0.629719 (Hartree/Particle)  
Thermal correction to Energy= 0.670102  
Thermal correction to Enthalpy= 0.671046  
Thermal correction to Gibbs Free Energy= 0.555199  
Sum of electronic and zero-point Energies= -2438.813039  
Sum of electronic and thermal Energies= -2438.772656  
Sum of electronic and thermal Enthalpies= -2438.771712  
Sum of electronic and thermal Free Energies= -2438.887559  
M06/6-311++G(d,p)-SDD/SMD//m06/6-31G(d)-LANL2DZ energy in ethanol solvent = -2441.5704737



## INT5a

| Center<br>Number | Atomic<br>Number | Atomic<br>Type | Coordinates (Angstroms) |           |           |
|------------------|------------------|----------------|-------------------------|-----------|-----------|
|                  |                  |                | X                       | Y         | Z         |
| 1                | 26               | 0              | 0.113418                | -3.256730 | 0.212761  |
| 2                | 15               | 0              | 1.803721                | -0.276868 | -0.109211 |
| 3                | 15               | 0              | -1.811401               | -0.475774 | 0.156436  |
| 4                | 6                | 0              | 2.729162                | 1.949489  | 1.257225  |
| 5                | 6                | 0              | 3.033803                | -0.521146 | -1.454070 |
| 6                | 6                | 0              | 3.438401                | -1.027868 | -3.787495 |
| 7                | 6                | 0              | 2.758088                | 0.551317  | 1.216700  |
| 8                | 6                | 0              | 4.810395                | -1.028940 | -3.551657 |
| 9                | 6                | 0              | 4.411131                | -0.530575 | -1.224636 |
| 10               | 6                | 0              | 2.555874                | -0.767014 | -2.745048 |
| 11               | 6                | 0              | 5.294368                | -0.777044 | -2.271411 |
| 12               | 6                | 0              | 3.500745                | -0.145687 | 2.175420  |
| 13               | 6                | 0              | 4.197325                | 0.546565  | 3.160449  |
| 14               | 6                | 0              | -1.591238               | -2.248599 | -0.163946 |
| 15               | 6                | 0              | -1.860903               | -3.402355 | 0.642667  |
| 16               | 6                | 0              | -1.664071               | -0.292332 | 1.973969  |
| 17               | 6                | 0              | 1.806111                | -4.309193 | 0.633252  |
| 18               | 6                | 0              | -1.004814               | -2.717285 | -1.388377 |
| 19               | 6                | 0              | -1.435103               | -4.555859 | -0.073598 |
| 20               | 6                | 0              | 3.433923                | 2.641045  | 2.237407  |
| 21               | 6                | 0              | -0.907034               | -4.133118 | -1.327199 |
| 22               | 6                | 0              | -0.644688               | 0.516214  | 2.480290  |
| 23               | 6                | 0              | 1.689517                | -1.999365 | 0.513088  |
| 24               | 6                | 0              | -2.508883               | -0.960052 | 2.867330  |
| 25               | 6                | 0              | 1.198536                | -3.839469 | 1.832071  |
| 26               | 6                | 0              | 2.115324                | -3.180861 | -0.175575 |
| 27               | 6                | 0              | 1.116125                | -2.421089 | 1.760877  |
| 28               | 6                | 0              | -3.602960               | -0.225425 | -0.116912 |
| 29               | 6                | 0              | -4.377425               | -1.135909 | -0.839944 |
| 30               | 6                | 0              | -2.292026               | -0.867916 | 4.237384  |
| 31               | 6                | 0              | -0.424289               | 0.608775  | 3.851169  |
| 32               | 6                | 0              | -1.240494               | -0.095867 | 4.729902  |
| 33               | 6                | 0              | 4.163094                | 1.937829  | 3.192095  |
| 34               | 6                | 0              | -5.527325               | 1.222956  | 0.090523  |
| 35               | 6                | 0              | -4.186452               | 0.961445  | 0.345869  |
| 36               | 6                | 0              | -6.295496               | 0.311516  | -0.631098 |
| 37               | 6                | 0              | -5.719506               | -0.866008 | -1.095667 |
| 38               | 1                | 0              | 0.673801                | -1.767624 | 2.508148  |
| 39               | 1                | 0              | 0.803472                | -4.456591 | 2.632592  |
| 40               | 1                | 0              | 1.960355                | -5.347951 | 0.359518  |
| 41               | 1                | 0              | 2.557655                | -3.206249 | -1.167134 |
| 42               | 1                | 0              | -0.642125               | -2.071333 | -2.183987 |
| 43               | 1                | 0              | -0.455088               | -4.774945 | -2.076347 |
| 44               | 1                | 0              | -1.448609               | -5.574913 | 0.300407  |
| 45               | 1                | 0              | -2.247198               | -3.392681 | 1.656989  |
| 46               | 1                | 0              | 1.479615                | -0.740043 | -2.929172 |
| 47               | 1                | 0              | 3.054111                | -1.217172 | -4.788649 |
| 48               | 1                | 0              | 5.504559                | -1.220646 | -4.368337 |
| 49               | 1                | 0              | 6.367115                | -0.771856 | -2.084631 |
| 50               | 1                | 0              | 4.797335                | -0.339298 | -0.223346 |
| 51               | 1                | 0              | 3.535109                | -1.234670 | 2.151281  |
| 52               | 1                | 0              | 4.768538                | -0.004447 | 3.906309  |
| 53               | 1                | 0              | 4.705449                | 2.477967  | 3.966696  |
| 54               | 1                | 0              | 3.397573                | 3.729297  | 2.254305  |
| 55               | 1                | 0              | 2.145820                | 2.494538  | 0.508748  |
| 56               | 1                | 0              | -3.349869               | -1.544027 | 2.490548  |
| 57               | 1                | 0              | -2.949749               | -1.395562 | 4.926513  |
| 58               | 1                | 0              | -1.072365               | -0.030062 | 5.803722  |
| 59               | 1                | 0              | 0.386495                | 1.233673  | 4.223631  |
| 60               | 1                | 0              | -0.019856               | 1.081699  | 1.788498  |
| 61               | 1                | 0              | -3.584663               | 1.683165  | 0.904449  |
| 62               | 1                | 0              | -5.974146               | 2.145745  | 0.457047  |

|    |    |   |           |           |           |
|----|----|---|-----------|-----------|-----------|
| 63 | 1  | 0 | -7.345149 | 0.520967  | -0.831453 |
| 64 | 1  | 0 | -6.316856 | -1.582645 | -1.657398 |
| 65 | 1  | 0 | -3.931045 | -2.062723 | -1.202926 |
| 66 | 46 | 0 | -0.188181 | 0.777632  | -1.035361 |
| 67 | 6  | 0 | 0.835468  | 2.406819  | -2.094016 |
| 68 | 6  | 0 | -0.009607 | 1.820717  | -3.042035 |
| 69 | 6  | 0 | -1.391745 | 1.623668  | -2.708016 |
| 70 | 1  | 0 | 1.892673  | 2.269531  | -2.377944 |
| 71 | 1  | 0 | 0.355615  | 1.275869  | -3.931944 |
| 72 | 6  | 0 | -2.250077 | 2.730385  | -2.165115 |
| 73 | 1  | 0 | -1.670858 | 3.464616  | -1.601639 |
| 74 | 1  | 0 | -3.051997 | 2.351538  | -1.516771 |
| 75 | 6  | 0 | -2.166309 | 0.613704  | -3.512288 |
| 76 | 1  | 0 | -2.947023 | 0.126421  | -2.909337 |
| 77 | 1  | 0 | -1.515057 | -0.165993 | -3.931925 |
| 78 | 1  | 0 | -2.682594 | 1.107920  | -4.353032 |
| 79 | 1  | 0 | -2.738923 | 3.249288  | -3.009428 |
| 80 | 1  | 0 | 0.414743  | 3.898606  | -0.789029 |
| 81 | 6  | 0 | 0.056083  | 4.704885  | -0.052788 |
| 82 | 6  | 0 | -0.507883 | 5.892726  | -0.845678 |
| 83 | 1  | 0 | -0.887394 | 6.678408  | -0.183329 |
| 84 | 1  | 0 | 0.283626  | 6.312786  | -1.475271 |
| 85 | 1  | 0 | -1.321620 | 5.555104  | -1.496572 |
| 86 | 6  | 0 | -0.959222 | 4.037339  | 0.757053  |
| 87 | 7  | 0 | -1.788599 | 3.461321  | 1.332786  |
| 88 | 6  | 0 | 1.191058  | 5.119291  | 0.763613  |
| 89 | 7  | 0 | 2.115644  | 5.474618  | 1.370917  |

-----  
Zero-point correction= 0.704301 (Hartree/Particle)  
Thermal correction to Energy= 0.751852  
Thermal correction to Enthalpy= 0.752797  
Thermal correction to Gibbs Free Energy= 0.623681  
Sum of electronic and zero-point Energies= -2702.864892  
Sum of electronic and thermal Energies= -2702.817341  
Sum of electronic and thermal Enthalpies= -2702.816397  
Sum of electronic and thermal Free Energies= -2702.945512  
M06/6-311++G(d,p)-SDD/SMD//m06/6-31G(d)-LANL2DZ energy in ethanol solvent = -2705.7762699

### TS3a

-----

| Center<br>Number | Atomic<br>Number | Atomic<br>Type | Coordinates (Angstroms) |           |           |
|------------------|------------------|----------------|-------------------------|-----------|-----------|
|                  |                  |                | X                       | Y         | Z         |
| 1                | 26               | 0              | -0.514530               | -3.213427 | -0.057293 |
| 2                | 15               | 0              | 1.686223                | -0.568388 | -0.094390 |
| 3                | 15               | 0              | -1.896682               | -0.151069 | 0.141059  |
| 4                | 6                | 0              | 3.006648                | 1.330392  | 1.420863  |
| 5                | 6                | 0              | 2.884322                | -0.923476 | -1.441864 |
| 6                | 6                | 0              | 3.256036                | -1.301330 | -3.804392 |
| 7                | 6                | 0              | 2.736411                | -0.036526 | 1.306114  |
| 8                | 6                | 0              | 4.595838                | -1.581880 | -3.550013 |
| 9                | 6                | 0              | 4.228075                | -1.211548 | -1.194372 |
| 10               | 6                | 0              | 2.406893                | -0.966343 | -2.755321 |
| 11               | 6                | 0              | 5.080050                | -1.533895 | -2.246270 |
| 12               | 6                | 0              | 3.276921                | -0.922987 | 2.243336  |
| 13               | 6                | 0              | 4.067456                | -0.442779 | 3.282470  |
| 14               | 6                | 0              | -2.004850               | -1.891007 | -0.370105 |
| 15               | 6                | 0              | -2.498412               | -3.049508 | 0.316800  |
| 16               | 6                | 0              | -1.738868               | -0.186035 | 1.966007  |
| 17               | 6                | 0              | 0.952379                | -4.580471 | 0.307880  |
| 18               | 6                | 0              | -1.465717               | -2.343159 | -1.622513 |
| 19               | 6                | 0              | -2.252592               | -4.189623 | -0.497620 |
| 20               | 6                | 0              | 3.806544                | 1.808489  | 2.453219  |
| 21               | 6                | 0              | -1.614467               | -3.754033 | -1.694089 |
| 22               | 6                | 0              | -0.618136               | 0.402455  | 2.554851  |
| 23               | 6                | 0              | 1.242403                | -2.284062 | 0.377646  |
| 24               | 6                | 0              | -2.688622               | -0.809295 | 2.783257  |

|    |    |   |           |           |           |
|----|----|---|-----------|-----------|-----------|
| 25 | 6  | 0 | 0.397617  | -4.106024 | 1.529888  |
| 26 | 6  | 0 | 1.478729  | -3.464300 | -0.399532 |
| 27 | 6  | 0 | 0.565910  | -2.694759 | 1.576203  |
| 28 | 6  | 0 | -3.601788 | 0.472125  | -0.077929 |
| 29 | 6  | 0 | -4.547907 | -0.193776 | -0.859907 |
| 30 | 6  | 0 | -2.479106 | -0.902902 | 4.154181  |
| 31 | 6  | 0 | -0.405617 | 0.308048  | 3.927076  |
| 32 | 6  | 0 | -1.328801 | -0.358677 | 4.725255  |
| 33 | 6  | 0 | 4.330863  | 0.919979  | 3.388011  |
| 34 | 6  | 0 | -5.198737 | 2.241351  | 0.325303  |
| 35 | 6  | 0 | -3.932211 | 1.700377  | 0.509934  |
| 36 | 6  | 0 | -6.140872 | 1.571055  | -0.452848 |
| 37 | 6  | 0 | -5.813687 | 0.356864  | -1.046509 |
| 38 | 1  | 0 | 0.219446  | -2.034902 | 2.367201  |
| 39 | 1  | 0 | -0.122955 | -4.704699 | 2.270446  |
| 40 | 1  | 0 | 0.932703  | -5.605659 | -0.047795 |
| 41 | 1  | 0 | 1.940798  | -3.489143 | -1.382021 |
| 42 | 1  | 0 | -0.969791 | -1.703617 | -2.348530 |
| 43 | 1  | 0 | -1.252116 | -4.393512 | -2.492067 |
| 44 | 1  | 0 | -2.457466 | -5.219982 | -0.224350 |
| 45 | 1  | 0 | -2.913664 | -3.064840 | 1.319170  |
| 46 | 1  | 0 | 1.359023  | -0.726154 | -2.950157 |
| 47 | 1  | 0 | 2.874106  | -1.331972 | -4.823674 |
| 48 | 1  | 0 | 5.265032  | -1.833578 | -4.371191 |
| 49 | 1  | 0 | 6.128563  | -1.748050 | -2.045176 |
| 50 | 1  | 0 | 4.611750  | -1.178016 | -0.174613 |
| 51 | 1  | 0 | 3.080768  | -1.991730 | 2.159737  |
| 52 | 1  | 0 | 4.481421  | -1.138966 | 4.010705  |
| 53 | 1  | 0 | 4.950527  | 1.292164  | 4.202470  |
| 54 | 1  | 0 | 4.013058  | 2.876046  | 2.513349  |
| 55 | 1  | 0 | 2.586769  | 2.024436  | 0.687999  |
| 56 | 1  | 0 | -3.604964 | -1.210114 | 2.347113  |
| 57 | 1  | 0 | -3.219209 | -1.395347 | 4.783151  |
| 58 | 1  | 0 | -1.166218 | -0.439305 | 5.798933  |
| 59 | 1  | 0 | 0.486978  | 0.757923  | 4.360422  |
| 60 | 1  | 0 | 0.090437  | 0.950702  | 1.935334  |
| 61 | 1  | 0 | -3.186917 | 2.235406  | 1.103926  |
| 62 | 1  | 0 | -5.450471 | 3.193592  | 0.789263  |
| 63 | 1  | 0 | -7.131682 | 1.999187  | -0.596797 |
| 64 | 1  | 0 | -6.547639 | -0.170122 | -1.654275 |
| 65 | 1  | 0 | -4.297179 | -1.149676 | -1.321648 |
| 66 | 46 | 0 | -0.061335 | 0.896816  | -0.947087 |
| 67 | 6  | 0 | 1.242832  | 2.408839  | -1.892219 |
| 68 | 6  | 0 | 0.284424  | 2.054071  | -2.849426 |
| 69 | 6  | 0 | -1.110601 | 2.092402  | -2.527546 |
| 70 | 1  | 0 | 2.255195  | 2.103422  | -2.200235 |
| 71 | 1  | 0 | 0.548774  | 1.493542  | -3.762701 |
| 72 | 6  | 0 | -1.774484 | 3.265782  | -1.866655 |
| 73 | 1  | 0 | -1.131901 | 3.785793  | -1.155066 |
| 74 | 1  | 0 | -2.683563 | 2.958492  | -1.331816 |
| 75 | 6  | 0 | -2.047015 | 1.308272  | -3.407043 |
| 76 | 1  | 0 | -2.890199 | 0.902297  | -2.829189 |
| 77 | 1  | 0 | -1.540572 | 0.475973  | -3.915195 |
| 78 | 1  | 0 | -2.483578 | 1.961860  | -4.181105 |
| 79 | 1  | 0 | -2.087899 | 3.984719  | -2.644469 |
| 80 | 1  | 0 | 1.246349  | 3.598992  | -0.768417 |
| 81 | 6  | 0 | 1.155664  | 4.530341  | 0.086082  |
| 82 | 6  | 0 | 0.762476  | 5.798083  | -0.676806 |
| 83 | 1  | 0 | 0.550346  | 6.643182  | -0.011186 |
| 84 | 1  | 0 | 1.584840  | 6.080699  | -1.344087 |
| 85 | 1  | 0 | -0.121877 | 5.609400  | -1.296353 |
| 86 | 6  | 0 | 0.126114  | 3.990004  | 0.942119  |
| 87 | 7  | 0 | -0.738977 | 3.449722  | 1.508282  |
| 88 | 6  | 0 | 2.422774  | 4.674371  | 0.763292  |
| 89 | 7  | 0 | 3.473224  | 4.787359  | 1.254238  |

-----  
Zero-point correction=

0.700962 (Hartree/Particle)

Thermal correction to Energy= 0.747939  
 Thermal correction to Enthalpy= 0.748884  
 Thermal correction to Gibbs Free Energy= 0.621127  
 Sum of electronic and zero-point Energies= -2702.866226  
 Sum of electronic and thermal Energies= -2702.819248  
 Sum of electronic and thermal Enthalpies= -2702.818304  
 Sum of electronic and thermal Free Energies= -2702.946061  
 M06/6-311++G(d,p)-SDD/SMD//m06/6-31G(d)-LANL2DZ energy in ethanol solvent = -2705.7744974

**INT6a**

| Center<br>Number | Atomic<br>Number | Atomic<br>Type | Coordinates (Angstroms) |           |           |
|------------------|------------------|----------------|-------------------------|-----------|-----------|
|                  |                  |                | X                       | Y         | Z         |
| 1                | 26               | 0              | -0.367233               | -3.256111 | -0.115347 |
| 2                | 15               | 0              | 1.742265                | -0.540163 | -0.071336 |
| 3                | 15               | 0              | -1.867044               | -0.271594 | 0.167599  |
| 4                | 6                | 0              | 3.014976                | 1.381043  | 1.443415  |
| 5                | 6                | 0              | 2.944054                | -0.769058 | -1.442744 |
| 6                | 6                | 0              | 3.329258                | -1.291211 | -3.778619 |
| 7                | 6                | 0              | 2.781593                | 0.008138  | 1.323329  |
| 8                | 6                | 0              | 4.698242                | -1.104460 | -3.597484 |
| 9                | 6                | 0              | 4.316502                | -0.582588 | -1.271006 |
| 10               | 6                | 0              | 2.458424                | -1.114295 | -2.710478 |
| 11               | 6                | 0              | 5.186728                | -0.747122 | -2.346365 |
| 12               | 6                | 0              | 3.397573                | -0.877253 | 2.214590  |
| 13               | 6                | 0              | 4.225468                | -0.384139 | 3.217562  |
| 14               | 6                | 0              | -1.914066               | -1.990956 | -0.410227 |
| 15               | 6                | 0              | -2.362382               | -3.188266 | 0.238482  |
| 16               | 6                | 0              | -1.939487               | -0.391043 | 1.992671  |
| 17               | 6                | 0              | 1.137983                | -4.580757 | 0.259268  |
| 18               | 6                | 0              | -1.337680               | -2.382615 | -1.665172 |
| 19               | 6                | 0              | -2.056858               | -4.293036 | -0.604832 |
| 20               | 6                | 0              | 3.858058                | 1.871242  | 2.434999  |
| 21               | 6                | 0              | -1.424469               | -3.796126 | -1.780403 |
| 22               | 6                | 0              | -0.868814               | 0.074177  | 2.759708  |
| 23               | 6                | 0              | 1.355032                | -2.277778 | 0.346463  |
| 24               | 6                | 0              | -3.049162               | -0.955034 | 2.630859  |
| 25               | 6                | 0              | 0.554815                | -4.132339 | 1.477491  |
| 26               | 6                | 0              | 1.636523                | -3.444501 | -0.436024 |
| 27               | 6                | 0              | 0.680043                | -2.717616 | 1.534383  |
| 28               | 6                | 0              | -3.516656               | 0.393036  | -0.248961 |
| 29               | 6                | 0              | -4.445731               | -0.310307 | -1.017987 |
| 30               | 6                | 0              | -3.063157               | -1.100611 | 4.013452  |
| 31               | 6                | 0              | -0.884765               | -0.072104 | 4.143680  |
| 32               | 6                | 0              | -1.975261               | -0.668230 | 4.769194  |
| 33               | 6                | 0              | 4.455970                | 0.985540  | 3.326822  |
| 34               | 6                | 0              | -5.021871               | 2.283459  | -0.177879 |
| 35               | 6                | 0              | -3.811051               | 1.697778  | 0.171493  |
| 36               | 6                | 0              | -5.946012               | 1.578536  | -0.947670 |
| 37               | 6                | 0              | -5.657597               | 0.283533  | -1.364655 |
| 38               | 1                | 0              | 0.300976                | -2.073421 | 2.322432  |
| 39               | 1                | 0              | 0.044816                | -4.751352 | 2.208416  |
| 40               | 1                | 0              | 1.154514                | -5.603549 | -0.103297 |
| 41               | 1                | 0              | 2.112226                | -3.450075 | -1.411819 |
| 42               | 1                | 0              | -0.862634               | -1.698154 | -2.364188 |
| 43               | 1                | 0              | -1.024446               | -4.396255 | -2.590888 |
| 44               | 1                | 0              | -2.218031               | -5.338692 | -0.362247 |
| 45               | 1                | 0              | -2.786992               | -3.247672 | 1.235725  |
| 46               | 1                | 0              | 1.384225                | -1.245324 | -2.856882 |
| 47               | 1                | 0              | 2.938914                | -1.566399 | -4.757282 |
| 48               | 1                | 0              | 5.382018                | -1.231541 | -4.434912 |
| 49               | 1                | 0              | 6.254481                | -0.592407 | -2.200936 |
| 50               | 1                | 0              | 4.710245                | -0.300664 | -0.295253 |
| 51               | 1                | 0              | 3.236585                | -1.951032 | 2.120590  |
| 52               | 1                | 0              | 4.697977                | -1.075624 | 3.913915  |
| 53               | 1                | 0              | 5.110100                | 1.363528  | 4.111222  |

|    |    |   |           |           |           |
|----|----|---|-----------|-----------|-----------|
| 54 | 1  | 0 | 4.028192  | 2.946356  | 2.485744  |
| 55 | 1  | 0 | 2.546178  | 2.083123  | 0.752383  |
| 56 | 1  | 0 | -3.913811 | -1.266686 | 2.041856  |
| 57 | 1  | 0 | -3.928290 | -1.544064 | 4.504073  |
| 58 | 1  | 0 | -1.988131 | -0.779978 | 5.852284  |
| 59 | 1  | 0 | -0.043334 | 0.291519  | 4.730964  |
| 60 | 1  | 0 | -0.034463 | 0.576057  | 2.269902  |
| 61 | 1  | 0 | -3.075403 | 2.250029  | 0.761570  |
| 62 | 1  | 0 | -5.245430 | 3.297013  | 0.151619  |
| 63 | 1  | 0 | -6.892977 | 2.041048  | -1.221341 |
| 64 | 1  | 0 | -6.378890 | -0.271413 | -1.962694 |
| 65 | 1  | 0 | -4.223934 | -1.325146 | -1.349620 |
| 66 | 46 | 0 | -0.020997 | 0.932212  | -0.749452 |
| 67 | 6  | 0 | 1.276564  | 2.212506  | -1.918086 |
| 68 | 6  | 0 | 0.207195  | 1.843339  | -2.771388 |
| 69 | 6  | 0 | -1.115322 | 2.252388  | -2.565280 |
| 70 | 1  | 0 | 2.271977  | 1.825230  | -2.138152 |
| 71 | 1  | 0 | 0.378720  | 1.037026  | -3.490628 |
| 72 | 6  | 0 | -1.487791 | 3.571344  | -1.966581 |
| 73 | 1  | 0 | -0.650957 | 4.084595  | -1.482138 |
| 74 | 1  | 0 | -2.299390 | 3.461589  | -1.233264 |
| 75 | 6  | 0 | -2.221293 | 1.575775  | -3.314743 |
| 76 | 1  | 0 | -3.109203 | 1.449181  | -2.677895 |
| 77 | 1  | 0 | -1.926159 | 0.589530  | -3.695951 |
| 78 | 1  | 0 | -2.536108 | 2.195471  | -4.169972 |
| 79 | 1  | 0 | -1.872429 | 4.218875  | -2.772016 |
| 80 | 1  | 0 | 1.251793  | 3.150993  | -1.353598 |
| 81 | 6  | 0 | 0.711637  | 4.838821  | 0.717714  |
| 82 | 6  | 0 | 0.018032  | 6.157788  | 0.475930  |
| 83 | 1  | 0 | 0.019675  | 6.814816  | 1.359536  |
| 84 | 1  | 0 | 0.484933  | 6.717815  | -0.346773 |
| 85 | 1  | 0 | -1.031790 | 5.985903  | 0.202722  |
| 86 | 6  | 0 | -0.000197 | 3.674330  | 0.918973  |
| 87 | 7  | 0 | -0.606258 | 2.661581  | 1.037311  |
| 88 | 6  | 0 | 2.102519  | 4.773661  | 0.897899  |
| 89 | 7  | 0 | 3.268321  | 4.706030  | 1.026388  |

-----  
Zero-point correction= 0.705685 (Hartree/Particle)  
Thermal correction to Energy= 0.753333  
Thermal correction to Enthalpy= 0.754277  
Thermal correction to Gibbs Free Energy= 0.623492  
Sum of electronic and zero-point Energies= -2702.908185  
Sum of electronic and thermal Energies= -2702.860537  
Sum of electronic and thermal Enthalpies= -2702.859593  
Sum of electronic and thermal Free Energies= -2702.990378  
M06/6-311++G(d,p)-SDD/SMD//m06/6-31G(d)-LANL2DZ energy in ethanol solvent = -2705.8283024

#### TS4a

-----

| Center<br>Number | Atomic<br>Number | Atomic<br>Type | Coordinates (Angstroms) |           |           |
|------------------|------------------|----------------|-------------------------|-----------|-----------|
|                  |                  |                | X                       | Y         | Z         |
| 1                | 26               | 0              | -1.966681               | -2.687096 | -0.597486 |
| 2                | 15               | 0              | 1.087085                | -1.284167 | -0.029910 |
| 3                | 15               | 0              | -2.118768               | 0.662506  | -0.002153 |
| 4                | 6                | 0              | 2.387655                | -0.412388 | 2.296432  |
| 5                | 6                | 0              | 2.223284                | -1.717196 | -1.397903 |
| 6                | 6                | 0              | 2.557417                | -2.178153 | -3.753263 |
| 7                | 6                | 0              | 2.105087                | -1.505615 | 1.475381  |
| 8                | 6                | 0              | 3.934939                | -2.039815 | -3.590616 |
| 9                | 6                | 0              | 3.605757                | -1.564894 | -1.248499 |
| 10               | 6                | 0              | 1.705391                | -1.998123 | -2.670438 |
| 11               | 6                | 0              | 4.453817                | -1.717302 | -2.342395 |
| 12               | 6                | 0              | 2.652447                | -2.755204 | 1.791019  |
| 13               | 6                | 0              | 3.477303                | -2.896115 | 2.898896  |
| 14               | 6                | 0              | -2.744841               | -0.830256 | -0.829147 |
| 15               | 6                | 0              | -3.762854               | -1.759319 | -0.435000 |

|    |    |   |           |           |           |
|----|----|---|-----------|-----------|-----------|
| 16 | 6  | 0 | -2.552867 | 0.451562  | 1.762687  |
| 17 | 6  | 0 | -1.334845 | -4.593334 | -0.243008 |
| 18 | 6  | 0 | -2.193423 | -1.306787 | -2.065389 |
| 19 | 6  | 0 | -3.831922 | -2.787743 | -1.416127 |
| 20 | 6  | 0 | 3.228783  | -0.548164 | 3.397570  |
| 21 | 6  | 0 | -2.864446 | -2.508277 | -2.423209 |
| 22 | 6  | 0 | -1.509278 | 0.424619  | 2.691642  |
| 23 | 6  | 0 | -0.057046 | -2.697609 | 0.102028  |
| 24 | 6  | 0 | -3.870762 | 0.315804  | 2.214038  |
| 25 | 6  | 0 | -1.777927 | -3.983355 | 0.964387  |
| 26 | 6  | 0 | -0.269605 | -3.810885 | -0.771412 |
| 27 | 6  | 0 | -0.996853 | -2.815958 | 1.178984  |
| 28 | 6  | 0 | -3.270336 | 1.972266  | -0.564749 |
| 29 | 6  | 0 | -3.728912 | 1.987720  | -1.885564 |
| 30 | 6  | 0 | -4.131112 | 0.120353  | 3.565533  |
| 31 | 6  | 0 | -1.768990 | 0.227634  | 4.044795  |
| 32 | 6  | 0 | -3.080408 | 0.068272  | 4.480059  |
| 33 | 6  | 0 | 3.773562  | -1.791171 | 3.696584  |
| 34 | 6  | 0 | -4.304626 | 4.133977  | -0.210738 |
| 35 | 6  | 0 | -3.559879 | 3.060150  | 0.266654  |
| 36 | 6  | 0 | -4.761624 | 4.138454  | -1.525365 |
| 37 | 6  | 0 | -4.472454 | 3.062956  | -2.360208 |
| 38 | 1  | 0 | -1.112346 | -2.109034 | 1.996507  |
| 39 | 1  | 0 | -2.607698 | -4.313174 | 1.580933  |
| 40 | 1  | 0 | -1.766094 | -5.473597 | -0.709090 |
| 41 | 1  | 0 | 0.262424  | -3.998221 | -1.698606 |
| 42 | 1  | 0 | -1.370622 | -0.836260 | -2.599456 |
| 43 | 1  | 0 | -2.637538 | -3.132606 | -3.281405 |
| 44 | 1  | 0 | -4.466077 | -3.667472 | -1.370135 |
| 45 | 1  | 0 | -4.329331 | -1.722650 | 0.490482  |
| 46 | 1  | 0 | 0.626033  | -2.068022 | -2.816357 |
| 47 | 1  | 0 | 2.142560  | -2.410901 | -4.733159 |
| 48 | 1  | 0 | 4.599806  | -2.163267 | -4.443787 |
| 49 | 1  | 0 | 5.519586  | -1.549250 | -2.201492 |
| 50 | 1  | 0 | 4.041798  | -1.288700 | -0.288085 |
| 51 | 1  | 0 | 2.439385  | -3.615548 | 1.154703  |
| 52 | 1  | 0 | 3.903675  | -3.869613 | 3.135648  |
| 53 | 1  | 0 | 4.437619  | -1.902248 | 4.552112  |
| 54 | 1  | 0 | 3.464987  | 0.328268  | 3.997809  |
| 55 | 1  | 0 | 1.953329  | 0.563904  | 2.078172  |
| 56 | 1  | 0 | -4.696303 | 0.383038  | 1.504122  |
| 57 | 1  | 0 | -5.158552 | 0.013857  | 3.909887  |
| 58 | 1  | 0 | -3.288320 | -0.085476 | 5.537649  |
| 59 | 1  | 0 | -0.945283 | 0.204217  | 4.755904  |
| 60 | 1  | 0 | -0.483457 | 0.554118  | 2.338679  |
| 61 | 1  | 0 | -3.207903 | 3.065842  | 1.299240  |
| 62 | 1  | 0 | -4.528616 | 4.970924  | 0.448660  |
| 63 | 1  | 0 | -5.343108 | 4.979529  | -1.898638 |
| 64 | 1  | 0 | -4.828868 | 3.059297  | -3.389058 |
| 65 | 1  | 0 | -3.502830 | 1.152860  | -2.549717 |
| 66 | 46 | 0 | 0.207847  | 0.935307  | -0.404245 |
| 67 | 6  | 0 | 2.509475  | 1.745078  | -0.478208 |
| 68 | 6  | 0 | 1.587003  | 2.477869  | -1.250727 |
| 69 | 6  | 0 | 0.482888  | 3.178032  | -0.718633 |
| 70 | 1  | 0 | 3.139794  | 1.000033  | -0.956545 |
| 71 | 1  | 0 | 1.650863  | 2.384971  | -2.338008 |
| 72 | 6  | 0 | 0.477731  | 3.729201  | 0.681640  |
| 73 | 1  | 0 | 1.162886  | 3.220974  | 1.371787  |
| 74 | 1  | 0 | -0.536282 | 3.702924  | 1.107504  |
| 75 | 6  | 0 | -0.455723 | 3.870349  | -1.663017 |
| 76 | 1  | 0 | -1.469736 | 3.931646  | -1.244310 |
| 77 | 1  | 0 | -0.514965 | 3.360587  | -2.633312 |
| 78 | 1  | 0 | -0.121540 | 4.906165  | -1.839340 |
| 79 | 1  | 0 | 0.784582  | 4.788831  | 0.657423  |
| 80 | 1  | 0 | 2.477038  | 1.754692  | 0.603102  |
| 81 | 6  | 0 | 4.550334  | 2.909253  | 0.033436  |
| 82 | 6  | 0 | 4.491644  | 4.103334  | -0.881553 |

|    |   |   |          |          |           |
|----|---|---|----------|----------|-----------|
| 83 | 1 | 0 | 5.308681 | 4.824043 | -0.728068 |
| 84 | 1 | 0 | 4.528881 | 3.775198 | -1.929093 |
| 85 | 1 | 0 | 3.543055 | 4.643099 | -0.736957 |
| 86 | 6 | 0 | 4.177608 | 3.042792 | 1.386425  |
| 87 | 7 | 0 | 3.739982 | 3.089836 | 2.474716  |
| 88 | 6 | 0 | 5.339108 | 1.787945 | -0.297450 |
| 89 | 7 | 0 | 5.896227 | 0.804815 | -0.611612 |

-----  
Zero-point correction= 0.705022 (Hartree/Particle)  
Thermal correction to Energy= 0.752399  
Thermal correction to Enthalpy= 0.753343  
Thermal correction to Gibbs Free Energy= 0.623475  
Sum of electronic and zero-point Energies= -2702.889518  
Sum of electronic and thermal Energies= -2702.842141  
Sum of electronic and thermal Enthalpies= -2702.841197  
Sum of electronic and thermal Free Energies= -2702.971065  
M06/6-311++G(d,p)-SDD/SMD//m06/6-31G(d)-LANL2DZ energy in ethanol solvent = -2705.814311

### INT7a

-----

| Center<br>Number | Atomic<br>Number | Atomic<br>Type | Coordinates (Angstroms) |           |           |
|------------------|------------------|----------------|-------------------------|-----------|-----------|
|                  |                  |                | X                       | Y         | Z         |
| 1                | 26               | 0              | -2.059985               | -1.962177 | -1.643164 |
| 2                | 15               | 0              | 0.878608                | -1.493647 | 0.046611  |
| 3                | 15               | 0              | -2.029008               | 0.893889  | 0.237666  |
| 4                | 6                | 0              | 1.734254                | -1.723605 | 2.676894  |
| 5                | 6                | 0              | 2.288377                | -1.703960 | -1.116892 |
| 6                | 6                | 0              | 3.230660                | -1.164612 | -3.288810 |
| 7                | 6                | 0              | 1.407109                | -2.442478 | 1.524543  |
| 8                | 6                | 0              | 4.449201                | -1.725687 | -2.908544 |
| 9                | 6                | 0              | 3.515630                | -2.258717 | -0.744732 |
| 10               | 6                | 0              | 2.166067                | -1.143250 | -2.396367 |
| 11               | 6                | 0              | 4.588547                | -2.267025 | -1.635707 |
| 12               | 6                | 0              | 1.502926                | -3.838479 | 1.539355  |
| 13               | 6                | 0              | 1.926763                | -4.499481 | 2.685830  |
| 14               | 6                | 0              | -2.585245               | -0.045285 | -1.219746 |
| 15               | 6                | 0              | -3.747826               | -0.855785 | -1.427847 |
| 16               | 6                | 0              | -3.051522               | 0.199098  | 1.597004  |
| 17               | 6                | 0              | -1.708201               | -3.931890 | -2.018513 |
| 18               | 6                | 0              | -1.811827               | -0.102047 | -2.425944 |
| 19               | 6                | 0              | -3.682617               | -1.403669 | -2.740572 |
| 20               | 6                | 0              | 2.163149                | -2.385672 | 3.824703  |
| 21               | 6                | 0              | -2.486736               | -0.936626 | -3.358240 |
| 22               | 6                | 0              | -2.414771               | -0.533876 | 2.601921  |
| 23               | 6                | 0              | -0.390018               | -2.607911 | -0.654493 |
| 24               | 6                | 0              | -4.436255               | 0.385856  | 1.664446  |
| 25               | 6                | 0              | -2.387903               | -3.772601 | -0.777617 |
| 26               | 6                | 0              | -0.476289               | -3.220147 | -1.943700 |
| 27               | 6                | 0              | -1.584734               | -2.950983 | 0.060353  |
| 28               | 6                | 0              | -2.821432               | 2.528769  | -0.026817 |
| 29               | 6                | 0              | -3.434688               | 2.903810  | -1.223472 |
| 30               | 6                | 0              | -5.171921               | -0.176463 | 2.701532  |
| 31               | 6                | 0              | -3.150855               | -1.097661 | 3.640814  |
| 32               | 6                | 0              | -4.530244               | -0.922616 | 3.687992  |
| 33               | 6                | 0              | 2.259632                | -3.772749 | 3.828001  |
| 34               | 6                | 0              | -3.153623               | 4.773509  | 0.823087  |
| 35               | 6                | 0              | -2.685914               | 3.478000  | 0.994279  |
| 36               | 6                | 0              | -3.755262               | 5.143233  | -0.379070 |
| 37               | 6                | 0              | -3.895668               | 4.207508  | -1.397660 |
| 38               | 1                | 0              | -1.843991               | -2.604603 | 1.057648  |
| 39               | 1                | 0              | -3.374103               | -4.155070 | -0.535061 |
| 40               | 1                | 0              | -2.084991               | -4.458183 | -2.889914 |
| 41               | 1                | 0              | 0.252822                | -3.121149 | -2.742000 |
| 42               | 1                | 0              | -0.851430               | 0.390369  | -2.563486 |
| 43               | 1                | 0              | -2.126418               | -1.217140 | -4.342700 |
| 44               | 1                | 0              | -4.388383               | -2.108227 | -3.169827 |

|    |    |   |           |           |           |
|----|----|---|-----------|-----------|-----------|
| 45 | 1  | 0 | -4.508099 | -1.070536 | -0.682813 |
| 46 | 1  | 0 | 1.221707  | -0.678643 | -2.688155 |
| 47 | 1  | 0 | 3.113198  | -0.733214 | -4.282016 |
| 48 | 1  | 0 | 5.287769  | -1.734924 | -3.602846 |
| 49 | 1  | 0 | 5.537798  | -2.703471 | -1.328097 |
| 50 | 1  | 0 | 3.639682  | -2.688923 | 0.248937  |
| 51 | 1  | 0 | 1.245814  | -4.406389 | 0.643710  |
| 52 | 1  | 0 | 1.999648  | -5.585938 | 2.690682  |
| 53 | 1  | 0 | 2.591828  | -4.293171 | 4.724950  |
| 54 | 1  | 0 | 2.419392  | -1.816253 | 4.716590  |
| 55 | 1  | 0 | 1.640767  | -0.635122 | 2.665688  |
| 56 | 1  | 0 | -4.938093 | 0.985053  | 0.902848  |
| 57 | 1  | 0 | -6.249769 | -0.027197 | 2.745702  |
| 58 | 1  | 0 | -5.107262 | -1.359266 | 4.501695  |
| 59 | 1  | 0 | -2.643405 | -1.665227 | 4.419287  |
| 60 | 1  | 0 | -1.329547 | -0.655644 | 2.563715  |
| 61 | 1  | 0 | -2.197452 | 3.192719  | 1.929078  |
| 62 | 1  | 0 | -3.041632 | 5.502088  | 1.624663  |
| 63 | 1  | 0 | -4.113530 | 6.161705  | -0.519459 |
| 64 | 1  | 0 | -4.369809 | 4.490545  | -2.336458 |
| 65 | 1  | 0 | -3.550675 | 2.174681  | -2.025970 |
| 66 | 46 | 0 | 0.343754  | 0.828422  | 0.238135  |
| 67 | 6  | 0 | 3.320495  | 1.555012  | 0.643657  |
| 68 | 6  | 0 | 2.193771  | 1.869034  | -0.295500 |
| 69 | 6  | 0 | 1.224796  | 2.868089  | -0.117311 |
| 70 | 1  | 0 | 3.521247  | 0.471985  | 0.686165  |
| 71 | 1  | 0 | 2.360711  | 1.532267  | -1.325913 |
| 72 | 6  | 0 | 1.126969  | 3.721354  | 1.118894  |
| 73 | 1  | 0 | 1.500239  | 3.223483  | 2.022746  |
| 74 | 1  | 0 | 0.079729  | 4.003652  | 1.302298  |
| 75 | 6  | 0 | 0.584921  | 3.495957  | -1.328347 |
| 76 | 1  | 0 | -0.468351 | 3.756944  | -1.146861 |
| 77 | 1  | 0 | 0.628334  | 2.833739  | -2.204630 |
| 78 | 1  | 0 | 1.111630  | 4.431779  | -1.586347 |
| 79 | 1  | 0 | 1.695435  | 4.657597  | 0.989049  |
| 80 | 1  | 0 | 3.096395  | 1.882093  | 1.667946  |
| 81 | 6  | 0 | 4.674260  | 2.207564  | 0.207025  |
| 82 | 6  | 0 | 5.162235  | 1.636251  | -1.136030 |
| 83 | 1  | 0 | 6.163982  | 2.006964  | -1.378197 |
| 84 | 1  | 0 | 5.187063  | 0.539538  | -1.078415 |
| 85 | 1  | 0 | 4.477983  | 1.930313  | -1.938966 |
| 86 | 6  | 0 | 4.501067  | 3.663923  | 0.090537  |
| 87 | 7  | 0 | 4.326612  | 4.805175  | -0.031433 |
| 88 | 6  | 0 | 5.675987  | 1.915727  | 1.243210  |
| 89 | 7  | 0 | 6.447254  | 1.629088  | 2.062255  |

-----  
Zero-point correction= 0.708258 (Hartree/Particle)  
Thermal correction to Energy= 0.755170  
Thermal correction to Enthalpy= 0.756115  
Thermal correction to Gibbs Free Energy= 0.627277  
Sum of electronic and zero-point Energies= -2702.935695  
Sum of electronic and thermal Energies= -2702.888783  
Sum of electronic and thermal Enthalpies= -2702.887839  
Sum of electronic and thermal Free Energies= -2703.016676  
M06/6-311++G(d,p)-SDD/SMD//m06/6-31G(d)-LANL2DZ energy in ethanol solvent = -2705.8495523

### 3a

| Center<br>Number | Atomic<br>Number | Atomic<br>Type | Coordinates (Angstroms) |           |           |
|------------------|------------------|----------------|-------------------------|-----------|-----------|
|                  |                  |                | X                       | Y         | Z         |
| 1                | 6                | 0              | 0.259173                | 0.681903  | -0.895228 |
| 2                | 6                | 0              | -1.080247               | 0.990336  | -0.306847 |
| 3                | 6                | 0              | -2.148870               | 0.181887  | -0.280469 |
| 4                | 1                | 0              | 0.692217                | 1.576289  | -1.367033 |
| 5                | 1                | 0              | -1.180054               | 1.977027  | 0.152965  |
| 6                | 6                | 0              | -2.198313               | -1.200197 | -0.852576 |



|    |   |   |           |           |           |
|----|---|---|-----------|-----------|-----------|
| 7  | 1 | 0 | -1.303293 | -1.480584 | -1.416946 |
| 8  | 1 | 0 | -3.069691 | -1.310388 | -1.513877 |
| 9  | 6 | 0 | -3.425488 | 0.627611  | 0.363283  |
| 10 | 1 | 0 | -4.251464 | 0.627387  | -0.363096 |
| 11 | 1 | 0 | -3.346843 | 1.633300  | 0.792191  |
| 12 | 1 | 0 | -3.719744 | -0.065454 | 1.164964  |
| 13 | 1 | 0 | -2.313981 | -1.939301 | -0.047028 |
| 14 | 1 | 0 | 0.198908  | -0.086290 | -1.676690 |
| 15 | 6 | 0 | 1.297510  | 0.206661  | 0.167857  |
| 16 | 6 | 0 | 1.509592  | 1.262040  | 1.264717  |
| 17 | 1 | 0 | 2.272714  | 0.936932  | 1.979093  |
| 18 | 1 | 0 | 1.832971  | 2.204478  | 0.806801  |
| 19 | 1 | 0 | 0.569965  | 1.426132  | 1.802475  |
| 20 | 6 | 0 | 0.822493  | -1.044837 | 0.780196  |
| 21 | 7 | 0 | 0.412202  | -2.014200 | 1.267770  |
| 22 | 6 | 0 | 2.576456  | -0.045099 | -0.514941 |
| 23 | 7 | 0 | 3.579863  | -0.194565 | -1.077739 |

-----  
Zero-point correction= 0.191288 (Hartree/Particle)  
Thermal correction to Energy= 0.203608  
Thermal correction to Enthalpy= 0.204552  
Thermal correction to Gibbs Free Energy= 0.153293  
Sum of electronic and zero-point Energies= -459.101977  
Sum of electronic and thermal Energies= -459.089657  
Sum of electronic and thermal Enthalpies= -459.088713  
Sum of electronic and thermal Free Energies= -459.139972  
M06/6-311++G(d,p)-SDD/SMD//m06/6-31G(d)-LANL2DZ energy in ethanol solvent = -459.4262488

### 1c

| Center<br>Number | Atomic<br>Number | Atomic<br>Type | Coordinates (Angstroms) |           |           |
|------------------|------------------|----------------|-------------------------|-----------|-----------|
|                  |                  |                | X                       | Y         | Z         |
| 1                | 6                | 0              | 1.697627                | -0.806294 | -0.650774 |
| 2                | 6                | 0              | 1.688672                | -0.820304 | 0.643573  |
| 3                | 6                | 0              | 0.774503                | 0.180481  | 0.001598  |
| 4                | 1                | 0              | 2.093031                | -1.186405 | -1.584462 |
| 5                | 1                | 0              | 2.069967                | -1.220896 | 1.574606  |
| 6                | 6                | 0              | -0.749903               | -0.068981 | -0.000791 |
| 7                | 6                | 0              | -1.402480               | 0.676582  | -1.166560 |
| 8                | 1                | 0              | -2.474514               | 0.439616  | -1.225196 |
| 9                | 1                | 0              | -1.314839               | 1.766164  | -1.063089 |
| 10               | 6                | 0              | 1.188585                | 1.643422  | 0.008519  |
| 11               | 1                | 0              | 0.915446                | 2.152155  | -0.926670 |
| 12               | 1                | 0              | 2.276424                | 1.725501  | 0.120754  |
| 13               | 1                | 0              | 0.727884                | 2.205971  | 0.832724  |
| 14               | 1                | 0              | -0.941693               | 0.388682  | -2.123381 |
| 15               | 6                | 0              | -1.360174               | 0.410844  | 1.317933  |
| 16               | 1                | 0              | -1.251512               | 1.494511  | 1.457618  |
| 17               | 1                | 0              | -2.436014               | 0.185521  | 1.352385  |
| 18               | 1                | 0              | -0.885327               | -0.089827 | 2.174500  |
| 19               | 6                | 0              | -1.060034               | -1.555582 | -0.154189 |
| 20               | 1                | 0              | -0.646730               | -1.960813 | -1.089051 |
| 21               | 1                | 0              | -0.645492               | -2.148476 | 0.672721  |
| 22               | 1                | 0              | -2.147408               | -1.712699 | -0.169323 |

-----  
Zero-point correction= 0.196559 (Hartree/Particle)  
Thermal correction to Energy= 0.206225  
Thermal correction to Enthalpy= 0.207169  
Thermal correction to Gibbs Free Energy= 0.163080  
Sum of electronic and zero-point Energies= -312.743918  
Sum of electronic and thermal Energies= -312.734252  
Sum of electronic and thermal Enthalpies= -312.733308  
Sum of electronic and thermal Free Energies= -312.777397  
M06/6-311++G(d,p)-SDD/SMD//m06/6-31G(d)-LANL2DZ energy in acetonitrile solvent = -313.0312482

### 2c

| Center Number | Atomic Number | Atomic Type | Coordinates (Angstroms) |           |           |
|---------------|---------------|-------------|-------------------------|-----------|-----------|
|               |               |             | X                       | Y         | Z         |
| 1             | 6             | 0           | -1.467631               | 0.000002  | 0.000001  |
| 2             | 6             | 0           | -0.747726               | -1.137297 | 0.382000  |
| 3             | 6             | 0           | 0.641625                | -1.145806 | 0.384339  |
| 4             | 6             | 0           | 1.328436                | 0.000003  | 0.000000  |
| 5             | 6             | 0           | 0.641625                | 1.145810  | -0.384338 |
| 6             | 6             | 0           | -0.747727               | 1.137301  | -0.381998 |
| 7             | 6             | 0           | -2.943743               | 0.000001  | 0.000000  |
| 8             | 6             | 0           | -3.660831               | -1.139183 | -0.383693 |
| 9             | 6             | 0           | -5.050030               | -1.139678 | -0.383693 |
| 10            | 6             | 0           | -5.750473               | -0.000002 | -0.000001 |
| 11            | 6             | 0           | -5.050034               | 1.139674  | 0.383692  |
| 12            | 6             | 0           | -3.660834               | 1.139183  | 0.383693  |
| 13            | 1             | 0           | -1.285220               | -2.026562 | 0.710429  |
| 14            | 1             | 0           | 1.182329                | -2.038317 | 0.692245  |
| 15            | 1             | 0           | 1.182328                | 2.038322  | -0.692245 |
| 16            | 1             | 0           | -1.285220               | 2.026566  | -0.710429 |
| 17            | 1             | 0           | -3.119003               | -2.025768 | -0.712782 |
| 18            | 1             | 0           | -5.589482               | -2.033533 | -0.693118 |
| 19            | 1             | 0           | -6.839039               | -0.000005 | -0.000003 |
| 20            | 1             | 0           | -5.589487               | 2.033529  | 0.693116  |
| 21            | 1             | 0           | -3.119010               | 2.025769  | 0.712784  |
| 22            | 53            | 0           | 3.457846                | -0.000001 | 0.000000  |

Zero-point correction= 0.170957 (Hartree/Particle)  
 Thermal correction to Energy= 0.181463  
 Thermal correction to Enthalpy= 0.182407  
 Thermal correction to Gibbs Free Energy= 0.132506  
 Sum of electronic and zero-point Energies= -473.503432  
 Sum of electronic and thermal Energies= -473.492927  
 Sum of electronic and thermal Enthalpies= -473.491983  
 Sum of electronic and thermal Free Energies= -473.541884  
 M06/6-311++G(d,p)-SDD/SMD//m06/6-31G(d)-LANL2DZ energy in acetonitrile solvent = -473.8437278

### INT1c

| Center Number | Atomic Number | Atomic Type | Coordinates (Angstroms) |           |           |
|---------------|---------------|-------------|-------------------------|-----------|-----------|
|               |               |             | X                       | Y         | Z         |
| 1             | 26            | 0           | 0.046332                | -3.118403 | 0.394221  |
| 2             | 15            | 0           | 1.884757                | -0.299840 | 0.000700  |
| 3             | 15            | 0           | -1.872635               | -0.341979 | -0.096579 |
| 4             | 6             | 0           | 3.672892                | 1.701765  | 0.689910  |
| 5             | 6             | 0           | 2.765843                | -0.754272 | -1.550352 |
| 6             | 6             | 0           | 2.758539                | -0.854199 | -3.970211 |
| 7             | 6             | 0           | 3.258075                | 0.401448  | 1.000025  |
| 8             | 6             | 0           | 4.027703                | -1.423451 | -3.953452 |
| 9             | 6             | 0           | 4.048899                | -1.311514 | -1.544858 |
| 10            | 6             | 0           | 2.132947                | -0.516696 | -2.772876 |
| 11            | 6             | 0           | 4.674654                | -1.647508 | -2.739795 |
| 12            | 6             | 0           | 3.894759                | -0.288677 | 2.033517  |
| 13            | 6             | 0           | 4.928728                | 0.313953  | 2.746460  |
| 14            | 6             | 0           | -1.556969               | -2.119242 | -0.333906 |
| 15            | 6             | 0           | -1.978916               | -3.242292 | 0.449573  |
| 16            | 6             | 0           | -2.641422               | -0.301125 | 1.575638  |
| 17            | 6             | 0           | 1.540654                | -4.184281 | 1.278698  |
| 18            | 6             | 0           | -0.749452               | -2.628682 | -1.403908 |
| 19            | 6             | 0           | -1.429223               | -4.421972 | -0.128580 |
| 20            | 6             | 0           | 4.710805                | 2.297046  | 1.395568  |
| 21            | 6             | 0           | -0.674316               | -4.043021 | -1.275529 |
| 22            | 6             | 0           | -1.935445               | 0.294455  | 2.623141  |
| 23            | 6             | 0           | 1.631370                | -1.922823 | 0.788255  |
| 24            | 6             | 0           | -3.908479               | -0.837205 | 1.830949  |
| 25            | 6             | 0           | 0.774986                | -3.493781 | 2.261276  |

|    |    |   |           |           |           |
|----|----|---|-----------|-----------|-----------|
| 26 | 6  | 0 | 2.075112  | -3.221420 | 0.376556  |
| 27 | 6  | 0 | 0.825774  | -2.104362 | 1.962084  |
| 28 | 6  | 0 | -3.342293 | -0.082217 | -1.171286 |
| 29 | 6  | 0 | -3.989941 | -1.113760 | -1.855063 |
| 30 | 6  | 0 | -4.444413 | -0.796517 | 3.113033  |
| 31 | 6  | 0 | -2.471201 | 0.336879  | 3.907418  |
| 32 | 6  | 0 | -3.725703 | -0.211417 | 4.153238  |
| 33 | 6  | 0 | 5.338515  | 1.604097  | 2.428719  |
| 34 | 6  | 0 | -4.942608 | 1.492985  | -2.076917 |
| 35 | 6  | 0 | -3.825467 | 1.225248  | -1.295858 |
| 36 | 6  | 0 | -5.581155 | 0.459212  | -2.758460 |
| 37 | 6  | 0 | -5.101784 | -0.841329 | -2.648726 |
| 38 | 1  | 0 | 0.295594  | -1.318351 | 2.493686  |
| 39 | 1  | 0 | 0.198987  | -3.951355 | 3.059008  |
| 40 | 1  | 0 | 1.648241  | -5.261148 | 1.195179  |
| 41 | 1  | 0 | 2.658199  | -3.432960 | -0.514842 |
| 42 | 1  | 0 | -0.240318 | -2.022476 | -2.148751 |
| 43 | 1  | 0 | -0.088101 | -4.707134 | -1.902341 |
| 44 | 1  | 0 | -1.517738 | -5.426467 | 0.273260  |
| 45 | 1  | 0 | -2.559905 | -3.186929 | 1.365558  |
| 46 | 1  | 0 | 1.146960  | -0.043982 | -2.771608 |
| 47 | 1  | 0 | 2.256761  | -0.663296 | -4.917654 |
| 48 | 1  | 0 | 4.521450  | -1.682982 | -4.888793 |
| 49 | 1  | 0 | 5.674587  | -2.078753 | -2.726010 |
| 50 | 1  | 0 | 4.563614  | -1.472921 | -0.596198 |
| 51 | 1  | 0 | 3.584522  | -1.304008 | 2.282359  |
| 52 | 1  | 0 | 5.417812  | -0.230636 | 3.553082  |
| 53 | 1  | 0 | 6.146464  | 2.073682  | 2.987771  |
| 54 | 1  | 0 | 5.025200  | 3.309174  | 1.145046  |
| 55 | 1  | 0 | 3.161523  | 2.246524  | -0.107592 |
| 56 | 1  | 0 | -4.481778 | -1.283021 | 1.016709  |
| 57 | 1  | 0 | -5.431749 | -1.216339 | 3.300302  |
| 58 | 1  | 0 | -4.150926 | -0.173983 | 5.155037  |
| 59 | 1  | 0 | -1.911585 | 0.809167  | 4.713193  |
| 60 | 1  | 0 | -0.958125 | 0.736728  | 2.420617  |
| 61 | 1  | 0 | -3.306705 | 2.036319  | -0.780374 |
| 62 | 1  | 0 | -5.312736 | 2.513650  | -2.161370 |
| 63 | 1  | 0 | -6.451433 | 0.670583  | -3.377954 |
| 64 | 1  | 0 | -5.597436 | -1.652948 | -3.179820 |
| 65 | 1  | 0 | -3.626169 | -2.137983 | -1.767676 |
| 66 | 46 | 0 | -0.006955 | 1.085494  | -0.474077 |
| 67 | 6  | 0 | -0.662871 | 2.829110  | -1.493873 |
| 68 | 6  | 0 | 0.729499  | 2.867290  | -1.435551 |
| 69 | 6  | 0 | -0.025519 | 4.050838  | -0.886966 |
| 70 | 1  | 0 | -1.393430 | 2.760568  | -2.300602 |
| 71 | 1  | 0 | 1.519883  | 2.827101  | -2.186401 |
| 72 | 6  | 0 | -0.145472 | 4.431928  | 0.611617  |
| 73 | 6  | 0 | 0.653148  | 5.710806  | 0.897496  |
| 74 | 1  | 0 | 0.647123  | 5.926164  | 1.975783  |
| 75 | 1  | 0 | 1.702827  | 5.593650  | 0.587691  |
| 76 | 6  | 0 | -0.052319 | 5.254897  | -1.822593 |
| 77 | 1  | 0 | -0.888955 | 5.935371  | -1.604982 |
| 78 | 1  | 0 | -0.162220 | 4.920158  | -2.862230 |
| 79 | 1  | 0 | 0.872296  | 5.847084  | -1.766360 |
| 80 | 1  | 0 | 0.244917  | 6.593517  | 0.388426  |
| 81 | 6  | 0 | -1.621611 | 4.669067  | 0.938538  |
| 82 | 1  | 0 | -1.743484 | 5.054309  | 1.962147  |
| 83 | 1  | 0 | -2.083156 | 5.395422  | 0.254163  |
| 84 | 1  | 0 | -2.185275 | 3.726688  | 0.862518  |
| 85 | 6  | 0 | 0.390811  | 3.375311  | 1.570470  |
| 86 | 1  | 0 | -0.111147 | 2.404921  | 1.434907  |
| 87 | 1  | 0 | 1.470361  | 3.215763  | 1.441985  |
| 88 | 1  | 0 | 0.215720  | 3.696735  | 2.608572  |

-----  
Zero-point correction= 0.715355 (Hartree/Particle)  
Thermal correction to Energy= 0.758827  
Thermal correction to Enthalpy= 0.759772

Thermal correction to Gibbs Free Energy= 0.638618  
 Sum of electronic and zero-point Energies= -2556.585122  
 Sum of electronic and thermal Energies= -2556.541650  
 Sum of electronic and thermal Enthalpies= -2556.540706  
 Sum of electronic and thermal Free Energies= -2556.661860  
 M06/6-311++G(d,p)-SDD/SMD//m06/6-31G(d)-LANL2DZ energy in acetonitrile solvent = -2559.4657995

### INT2c

| Center<br>Number | Atomic<br>Number | Atomic<br>Type | Coordinates (Angstroms) |           |           |
|------------------|------------------|----------------|-------------------------|-----------|-----------|
|                  |                  |                | X                       | Y         | Z         |
| 1                | 26               | 0              | -0.513149               | 3.421422  | -0.870848 |
| 2                | 15               | 0              | 1.700215                | 0.893220  | -0.386413 |
| 3                | 15               | 0              | -2.089390               | 0.738553  | 0.527606  |
| 4                | 6                | 0              | 4.044919                | -0.435547 | -1.369387 |
| 5                | 6                | 0              | 2.930250                | 1.802476  | 0.635932  |
| 6                | 6                | 0              | 3.581095                | 2.568725  | 2.844234  |
| 7                | 6                | 0              | 2.720205                | -0.054389 | -1.599021 |
| 8                | 6                | 0              | 4.711876                | 3.174731  | 2.305207  |
| 9                | 6                | 0              | 4.066138                | 2.424144  | 0.105152  |
| 10               | 6                | 0              | 2.698653                | 1.885746  | 2.011574  |
| 11               | 6                | 0              | 4.953490                | 3.100975  | 0.934963  |
| 12               | 6                | 0              | 2.078323                | -0.540433 | -2.746154 |
| 13               | 6                | 0              | 2.749537                | -1.349389 | -3.653706 |
| 14               | 6                | 0              | -1.834312               | 2.540044  | 0.384990  |
| 15               | 6                | 0              | -2.490773               | 3.516219  | -0.434462 |
| 16               | 6                | 0              | -3.126733               | 0.371334  | -0.947906 |
| 17               | 6                | 0              | 0.564394                | 4.324946  | -2.344594 |
| 18               | 6                | 0              | -0.816676               | 3.229749  | 1.123962  |
| 19               | 6                | 0              | -1.874859               | 4.780220  | -0.207262 |
| 20               | 6                | 0              | 4.716473                | -1.252064 | -2.276994 |
| 21               | 6                | 0              | -0.843275               | 4.603752  | 0.759076  |
| 22               | 6                | 0              | -2.602916               | -0.455525 | -1.944312 |
| 23               | 6                | 0              | 1.052638                | 2.250941  | -1.429944 |
| 24               | 6                | 0              | -4.423072               | 0.875580  | -1.097072 |
| 25               | 6                | 0              | -0.342439               | 3.379864  | -2.900759 |
| 26               | 6                | 0              | 1.424232                | 3.635219  | -1.443802 |
| 27               | 6                | 0              | -0.052052               | 2.107908  | -2.334839 |
| 28               | 6                | 0              | -3.350582               | 0.658465  | 1.866421  |
| 29               | 6                | 0              | -3.715566               | 1.758666  | 2.645200  |
| 30               | 6                | 0              | -5.165373               | 0.585193  | -2.236215 |
| 31               | 6                | 0              | -3.346203               | -0.750169 | -3.084370 |
| 32               | 6                | 0              | -4.624967               | -0.224126 | -3.233475 |
| 33               | 6                | 0              | 4.076840                | -1.705611 | -3.424059 |
| 34               | 6                | 0              | -4.859589               | -0.725842 | 3.161704  |
| 35               | 6                | 0              | -3.929334               | -0.587402 | 2.140188  |
| 36               | 6                | 0              | -5.214180               | 0.376262  | 3.937584  |
| 37               | 6                | 0              | -4.639830               | 1.615026  | 3.677932  |
| 38               | 1                | 0              | -0.621034               | 1.198962  | -2.510629 |
| 39               | 1                | 0              | -1.157387               | 3.597904  | -3.583431 |
| 40               | 1                | 0              | 0.564025                | 5.394709  | -2.528878 |
| 41               | 1                | 0              | 2.188754                | 4.091801  | -0.823758 |
| 42               | 1                | 0              | -0.112177               | 2.757134  | 1.803589  |
| 43               | 1                | 0              | -0.156459               | 5.367997  | 1.108296  |
| 44               | 1                | 0              | -2.106946               | 5.702528  | -0.730786 |
| 45               | 1                | 0              | -3.267355               | 3.308841  | -1.164229 |
| 46               | 1                | 0              | 1.816659                | 1.392304  | 2.428512  |
| 47               | 1                | 0              | 3.386548                | 2.624374  | 3.914190  |
| 48               | 1                | 0              | 5.407260                | 3.706748  | 2.952688  |
| 49               | 1                | 0              | 5.837588                | 3.574725  | 0.510717  |
| 50               | 1                | 0              | 4.259783                | 2.369636  | -0.966885 |
| 51               | 1                | 0              | 1.034540                | -0.285918 | -2.934617 |
| 52               | 1                | 0              | 2.233161                | -1.704236 | -4.544656 |
| 53               | 1                | 0              | 4.605729                | -2.339275 | -4.134395 |
| 54               | 1                | 0              | 5.749284                | -1.533357 | -2.074687 |
| 55               | 1                | 0              | 4.566523                | -0.103680 | -0.472489 |

|    |    |   |           |           |           |
|----|----|---|-----------|-----------|-----------|
| 56 | 1  | 0 | -4.857252 | 1.490054  | -0.306599 |
| 57 | 1  | 0 | -6.173269 | 0.983865  | -2.343490 |
| 58 | 1  | 0 | -5.210572 | -0.458226 | -4.121371 |
| 59 | 1  | 0 | -2.931097 | -1.407591 | -3.846956 |
| 60 | 1  | 0 | -1.608846 | -0.891463 | -1.803579 |
| 61 | 1  | 0 | -3.655297 | -1.454524 | 1.533415  |
| 62 | 1  | 0 | -5.308371 | -1.699075 | 3.355653  |
| 63 | 1  | 0 | -5.938908 | 0.266816  | 4.742937  |
| 64 | 1  | 0 | -4.915557 | 2.481485  | 4.277855  |
| 65 | 1  | 0 | -3.279979 | 2.737551  | 2.443961  |
| 66 | 6  | 0 | 2.102612  | -2.774289 | 0.757010  |
| 67 | 6  | 0 | 1.042645  | -2.334045 | 1.592014  |
| 68 | 6  | 0 | -0.303363 | -2.655938 | 1.305890  |
| 69 | 6  | 0 | -0.566033 | -3.377402 | 0.122080  |
| 70 | 6  | 0 | 0.449303  | -3.754890 | -0.732994 |
| 71 | 6  | 0 | 1.781862  | -3.458951 | -0.406792 |
| 72 | 1  | 0 | 1.277935  | -1.930818 | 2.577924  |
| 73 | 1  | 0 | -1.070500 | -2.536919 | 2.068601  |
| 74 | 1  | 0 | 0.226224  | -4.299442 | -1.648574 |
| 75 | 1  | 0 | 2.568103  | -3.749042 | -1.102815 |
| 76 | 53 | 0 | -2.572363 | -3.945435 | -0.304932 |
| 77 | 46 | 0 | -0.006853 | -0.427073 | 0.646684  |
| 78 | 6  | 0 | 3.499959  | -2.480158 | 1.124802  |
| 79 | 6  | 0 | 3.808965  | -1.358280 | 1.903787  |
| 80 | 6  | 0 | 4.557998  | -3.292092 | 0.696583  |
| 81 | 6  | 0 | 5.124082  | -1.032862 | 2.212080  |
| 82 | 1  | 0 | 3.006194  | -0.697331 | 2.227414  |
| 83 | 6  | 0 | 5.873520  | -2.976097 | 1.011436  |
| 84 | 1  | 0 | 4.344422  | -4.192460 | 0.121088  |
| 85 | 6  | 0 | 6.165494  | -1.839758 | 1.763131  |
| 86 | 1  | 0 | 5.331166  | -0.133353 | 2.792150  |
| 87 | 1  | 0 | 6.678683  | -3.625877 | 0.670756  |
| 88 | 1  | 0 | 7.198141  | -1.590539 | 2.002256  |

-----  
Zero-point correction= 0.688296 (Hartree/Particle)  
Thermal correction to Energy= 0.733467  
Thermal correction to Enthalpy= 0.734411  
Thermal correction to Gibbs Free Energy= 0.608835  
Sum of electronic and zero-point Energies= -2717.344454  
Sum of electronic and thermal Energies= -2717.299283  
Sum of electronic and thermal Enthalpies= -2717.298338  
Sum of electronic and thermal Free Energies= -2717.423914  
M06/6-311++G(d,p)-SDD/SMD//m06/6-31G(d)-LANL2DZ energy in acetonitrile solvent = -2720.2661986

### TS1c

| Center<br>Number | Atomic<br>Number | Atomic<br>Type | Coordinates (Angstroms) |           |           |
|------------------|------------------|----------------|-------------------------|-----------|-----------|
|                  |                  |                | X                       | Y         | Z         |
| 1                | 26               | 0              | -1.810787               | 3.059683  | -0.590112 |
| 2                | 15               | 0              | 0.955940                | 1.067303  | -0.645807 |
| 3                | 15               | 0              | -2.505443               | -0.092601 | 0.465766  |
| 4                | 6                | 0              | 3.743687                | 1.185680  | -1.288516 |
| 5                | 6                | 0              | 1.600606                | 1.757503  | 0.932135  |
| 6                | 6                | 0              | 1.793933                | 1.498813  | 3.337905  |
| 7                | 6                | 0              | 2.430060                | 1.082187  | -1.751528 |
| 8                | 6                | 0              | 2.559155                | 2.658924  | 3.407805  |
| 9                | 6                | 0              | 2.371588                | 2.923531  | 1.017265  |
| 10               | 6                | 0              | 1.322059                | 1.050481  | 2.106384  |
| 11               | 6                | 0              | 2.849009                | 3.369792  | 2.245081  |
| 12               | 6                | 0              | 2.217448                | 0.815566  | -3.109374 |
| 13               | 6                | 0              | 3.289649                | 0.685074  | -3.983593 |
| 14               | 6                | 0              | -2.743832               | 1.709266  | 0.603958  |
| 15               | 6                | 0              | -3.704603               | 2.536783  | -0.062043 |
| 16               | 6                | 0              | -3.968697               | -0.573464 | -0.535475 |
| 17               | 6                | 0              | -1.072161               | 4.416508  | -1.918747 |
| 18               | 6                | 0              | -1.895270               | 2.575234  | 1.371304  |

|    |    |   |           |           |           |
|----|----|---|-----------|-----------|-----------|
| 19 | 6  | 0 | -3.446442 | 3.892083  | 0.289208  |
| 20 | 6  | 0 | 4.818897  | 1.055145  | -2.163363 |
| 21 | 6  | 0 | -2.335846 | 3.914411  | 1.181006  |
| 22 | 6  | 0 | -3.755129 | -1.027221 | -1.838912 |
| 23 | 6  | 0 | -0.049797 | 2.414309  | -1.355440 |
| 24 | 6  | 0 | -5.277754 | -0.480379 | -0.051614 |
| 25 | 6  | 0 | -1.753351 | 3.371885  | -2.605876 |
| 26 | 6  | 0 | -0.025668 | 3.833373  | -1.149930 |
| 27 | 6  | 0 | -1.127461 | 2.142633  | -2.263208 |
| 28 | 6  | 0 | -2.961778 | -0.656478 | 2.156834  |
| 29 | 6  | 0 | -3.589452 | 0.156769  | 3.104796  |
| 30 | 6  | 0 | -6.352401 | -0.819226 | -0.864808 |
| 31 | 6  | 0 | -4.831840 | -1.362849 | -2.655282 |
| 32 | 6  | 0 | -6.130269 | -1.257019 | -2.169281 |
| 33 | 6  | 0 | 4.595979  | 0.807493  | -3.513440 |
| 34 | 6  | 0 | -2.973241 | -2.480314 | 3.751324  |
| 35 | 6  | 0 | -2.651333 | -1.978308 | 2.495969  |
| 36 | 6  | 0 | -3.595083 | -1.661877 | 4.690810  |
| 37 | 6  | 0 | -3.900542 | -0.344106 | 4.366066  |
| 38 | 1  | 0 | -1.442055 | 1.148748  | -2.572064 |
| 39 | 1  | 0 | -2.632905 | 3.485487  | -3.230933 |
| 40 | 1  | 0 | -1.345864 | 5.466937  | -1.924203 |
| 41 | 1  | 0 | 0.627876  | 4.366754  | -0.467412 |
| 42 | 1  | 0 | -1.035049 | 2.262445  | 1.958670  |
| 43 | 1  | 0 | -1.866081 | 4.801659  | 1.593548  |
| 44 | 1  | 0 | -3.969814 | 4.760314  | -0.098668 |
| 45 | 1  | 0 | -4.458368 | 2.184738  | -0.759909 |
| 46 | 1  | 0 | 0.732371  | 0.132140  | 2.043907  |
| 47 | 1  | 0 | 1.565297  | 0.936546  | 4.242062  |
| 48 | 1  | 0 | 2.933977  | 3.010090  | 4.368118  |
| 49 | 1  | 0 | 3.452960  | 4.274643  | 2.293871  |
| 50 | 1  | 0 | 2.625045  | 3.474042  | 0.110802  |
| 51 | 1  | 0 | 1.199762  | 0.696513  | -3.487099 |
| 52 | 1  | 0 | 3.104872  | 0.482596  | -5.037713 |
| 53 | 1  | 0 | 5.435200  | 0.701670  | -4.199128 |
| 54 | 1  | 0 | 5.833181  | 1.132473  | -1.771670 |
| 55 | 1  | 0 | 3.944547  | 1.350842  | -0.230745 |
| 56 | 1  | 0 | -5.454743 | -0.140467 | 0.970000  |
| 57 | 1  | 0 | -7.368196 | -0.744999 | -0.479224 |
| 58 | 1  | 0 | -6.974112 | -1.524919 | -2.803362 |
| 59 | 1  | 0 | -4.653465 | -1.718449 | -3.668815 |
| 60 | 1  | 0 | -2.731502 | -1.136424 | -2.203267 |
| 61 | 1  | 0 | -2.152885 | -2.615223 | 1.761733  |
| 62 | 1  | 0 | -2.730594 | -3.512505 | 3.999341  |
| 63 | 1  | 0 | -3.838705 | -2.051177 | 5.678171  |
| 64 | 1  | 0 | -4.385154 | 0.300831  | 5.097840  |
| 65 | 1  | 0 | -3.834376 | 1.190274  | 2.857836  |
| 66 | 6  | 0 | 3.810876  | -1.777992 | 0.513123  |
| 67 | 6  | 0 | 2.811055  | -2.034335 | 1.455742  |
| 68 | 6  | 0 | 1.531418  | -2.414322 | 1.064018  |
| 69 | 6  | 0 | 1.222098  | -2.447563 | -0.303371 |
| 70 | 6  | 0 | 2.242972  | -2.346494 | -1.256227 |
| 71 | 6  | 0 | 3.518622  | -2.005469 | -0.842538 |
| 72 | 1  | 0 | 3.036975  | -1.925708 | 2.517801  |
| 73 | 1  | 0 | 0.761454  | -2.614609 | 1.809212  |
| 74 | 1  | 0 | 2.013067  | -2.436426 | -2.317300 |
| 75 | 1  | 0 | 4.284784  | -1.814105 | -1.595160 |
| 76 | 53 | 0 | -0.686009 | -3.700957 | -0.938442 |
| 77 | 46 | 0 | -0.395405 | -1.004977 | -0.319110 |
| 78 | 6  | 0 | 5.098464  | -1.183893 | 0.908958  |
| 79 | 6  | 0 | 5.123246  | -0.151457 | 1.857680  |
| 80 | 6  | 0 | 6.303551  | -1.557706 | 0.302816  |
| 81 | 6  | 0 | 6.312449  | 0.488593  | 2.184364  |
| 82 | 1  | 0 | 4.184890  | 0.181247  | 2.307375  |
| 83 | 6  | 0 | 7.494464  | -0.921853 | 0.634799  |
| 84 | 1  | 0 | 6.302206  | -2.367163 | -0.427418 |
| 85 | 6  | 0 | 7.504484  | 0.105747  | 1.574542  |

|    |   |   |          |           |          |
|----|---|---|----------|-----------|----------|
| 86 | 1 | 0 | 6.302388 | 1.301835  | 2.909508 |
| 87 | 1 | 0 | 8.423154 | -1.233576 | 0.158415 |
| 88 | 1 | 0 | 8.437016 | 0.607559  | 1.827958 |

-----

Zero-point correction= 0.687140 (Hartree/Particle)  
Thermal correction to Energy= 0.732087  
Thermal correction to Enthalpy= 0.733031  
Thermal correction to Gibbs Free Energy= 0.607085  
Sum of electronic and zero-point Energies= -2717.335120  
Sum of electronic and thermal Energies= -2717.290173  
Sum of electronic and thermal Enthalpies= -2717.289229  
Sum of electronic and thermal Free Energies= -2717.415175  
M06/6-311++G(d,p)-SDD/SMD//m06/6-31G(d)-LANL2DZ energy in acetonitrile solvent = -2720.2568489

### INT3c

-----

| Center<br>Number | Atomic<br>Number | Atomic<br>Type | Coordinates (Angstroms) |           |           |
|------------------|------------------|----------------|-------------------------|-----------|-----------|
|                  |                  |                | X                       | Y         | Z         |
| 1                | 26               | 0              | -2.669785               | 2.401659  | -1.239514 |
| 2                | 15               | 0              | 0.411232                | 1.558806  | -0.064420 |
| 3                | 15               | 0              | -2.445890               | -0.713078 | 0.116923  |
| 4                | 6                | 0              | 3.083784                | 2.197695  | 0.467515  |
| 5                | 6                | 0              | 0.062034                | 2.271801  | 1.580703  |
| 6                | 6                | 0              | -0.802997               | 1.942976  | 3.819478  |
| 7                | 6                | 0              | 2.063699                | 2.210394  | -0.488584 |
| 8                | 6                | 0              | -0.670683               | 3.304644  | 4.070570  |
| 9                | 6                | 0              | 0.228060                | 3.633889  | 1.855526  |
| 10               | 6                | 0              | -0.429336               | 1.429127  | 2.580635  |
| 11               | 6                | 0              | -0.143628               | 4.147221  | 3.092643  |
| 12               | 6                | 0              | 2.357013                | 2.597323  | -1.799099 |
| 13               | 6                | 0              | 3.653196                | 2.962285  | -2.147650 |
| 14               | 6                | 0              | -3.388499               | 0.830198  | -0.183797 |
| 15               | 6                | 0              | -4.238052               | 1.104496  | -1.304603 |
| 16               | 6                | 0              | -3.345058               | -1.828541 | -1.024962 |
| 17               | 6                | 0              | -1.979862               | 3.960102  | -2.366438 |
| 18               | 6                | 0              | -3.355351               | 2.017422  | 0.623301  |
| 19               | 6                | 0              | -4.707944               | 2.442628  | -1.193453 |
| 20               | 6                | 0              | 4.378930                | 2.552437  | 0.112525  |
| 21               | 6                | 0              | -4.170633               | 3.002264  | -0.000048 |
| 22               | 6                | 0              | -2.800864               | -2.035542 | -2.294720 |
| 23               | 6                | 0              | -0.663961               | 2.432032  | -1.233172 |
| 24               | 6                | 0              | -4.586542               | -2.383252 | -0.710266 |
| 25               | 6                | 0              | -1.960350               | 2.754458  | -3.124063 |
| 26               | 6                | 0              | -1.179702               | 3.770371  | -1.205664 |
| 27               | 6                | 0              | -1.147224               | 1.814188  | -2.435351 |
| 28               | 6                | 0              | -3.019930               | -1.151145 | 1.807788  |
| 29               | 6                | 0              | -4.241059               | -0.696983 | 2.320408  |
| 30               | 6                | 0              | -5.282116               | -3.122490 | -1.661357 |
| 31               | 6                | 0              | -3.503368               | -2.763126 | -3.248673 |
| 32               | 6                | 0              | -4.745682               | -3.305488 | -2.932534 |
| 33               | 6                | 0              | 4.666771                | 2.933263  | -1.195394 |
| 34               | 6                | 0              | -2.585867               | -2.266489 | 3.913133  |
| 35               | 6                | 0              | -2.194948               | -1.938188 | 2.618829  |
| 36               | 6                | 0              | -3.801937               | -1.811258 | 4.413042  |
| 37               | 6                | 0              | -4.629694               | -1.027669 | 3.614073  |
| 38               | 1                | 0              | -0.957843               | 0.782421  | -2.721792 |
| 39               | 1                | 0              | -2.516091               | 2.565404  | -4.036410 |
| 40               | 1                | 0              | -2.559785               | 4.847635  | -2.598751 |
| 41               | 1                | 0              | -1.046277               | 4.487084  | -0.401107 |
| 42               | 1                | 0              | -2.782317               | 2.148425  | 1.537752  |
| 43               | 1                | 0              | -4.306297               | 4.022128  | 0.345461  |
| 44               | 1                | 0              | -5.326049               | 2.960592  | -1.919582 |
| 45               | 1                | 0              | -4.439180               | 0.419185  | -2.123127 |
| 46               | 1                | 0              | -0.530338               | 0.361048  | 2.377131  |
| 47               | 1                | 0              | -1.199537               | 1.273898  | 4.581865  |
| 48               | 1                | 0              | -0.965831               | 3.712330  | 5.036040  |

|    |    |   |           |           |           |
|----|----|---|-----------|-----------|-----------|
| 49 | 1  | 0 | -0.017579 | 5.208994  | 3.298365  |
| 50 | 1  | 0 | 0.661280  | 4.292306  | 1.101588  |
| 51 | 1  | 0 | 1.571697  | 2.607648  | -2.555268 |
| 52 | 1  | 0 | 3.872153  | 3.263207  | -3.170907 |
| 53 | 1  | 0 | 5.684802  | 3.202437  | -1.471523 |
| 54 | 1  | 0 | 5.171307  | 2.522362  | 0.859002  |
| 55 | 1  | 0 | 2.869678  | 1.888919  | 1.490701  |
| 56 | 1  | 0 | -5.011851 | -2.241544 | 0.283489  |
| 57 | 1  | 0 | -6.246856 | -3.558931 | -1.407608 |
| 58 | 1  | 0 | -5.292510 | -3.883007 | -3.676208 |
| 59 | 1  | 0 | -3.069998 | -2.922616 | -4.234537 |
| 60 | 1  | 0 | -1.809294 | -1.643229 | -2.523834 |
| 61 | 1  | 0 | -1.244325 | -2.304009 | 2.226152  |
| 62 | 1  | 0 | -1.935323 | -2.883541 | 4.530631  |
| 63 | 1  | 0 | -4.105783 | -2.066802 | 5.427082  |
| 64 | 1  | 0 | -5.582640 | -0.668369 | 3.999787  |
| 65 | 1  | 0 | -4.891867 | -0.075545 | 1.705114  |
| 66 | 6  | 0 | 4.887933  | -0.974824 | 0.015570  |
| 67 | 6  | 0 | 4.130293  | -1.103006 | 1.184681  |
| 68 | 6  | 0 | 2.738378  | -1.088114 | 1.145399  |
| 69 | 6  | 0 | 2.070591  | -0.938085 | -0.069219 |
| 70 | 6  | 0 | 2.813588  | -0.833505 | -1.242632 |
| 71 | 6  | 0 | 4.202813  | -0.849412 | -1.198729 |
| 72 | 1  | 0 | 4.637041  | -1.246108 | 2.140218  |
| 73 | 1  | 0 | 2.174978  | -1.208354 | 2.073158  |
| 74 | 1  | 0 | 2.310625  | -0.706700 | -2.203251 |
| 75 | 1  | 0 | 4.768065  | -0.717164 | -2.122308 |
| 76 | 53 | 0 | 0.050582  | -3.474500 | -0.216191 |
| 77 | 46 | 0 | 0.033173  | -0.771128 | -0.084673 |
| 78 | 6  | 0 | 6.362728  | -0.946686 | 0.057902  |
| 79 | 6  | 0 | 7.041480  | -0.325452 | 1.114049  |
| 80 | 6  | 0 | 7.126763  | -1.529514 | -0.960863 |
| 81 | 6  | 0 | 8.430041  | -0.285494 | 1.149959  |
| 82 | 1  | 0 | 6.466255  | 0.149588  | 1.909216  |
| 83 | 6  | 0 | 8.515085  | -1.487647 | -0.928667 |
| 84 | 1  | 0 | 6.619442  | -2.047175 | -1.774640 |
| 85 | 6  | 0 | 9.174552  | -0.864426 | 0.126724  |
| 86 | 1  | 0 | 8.934311  | 0.208886  | 1.979499  |
| 87 | 1  | 0 | 9.086209  | -1.956491 | -1.728968 |
| 88 | 1  | 0 | 10.262563 | -0.832825 | 0.153362  |

-----  
Zero-point correction= 0.688665 (Hartree/Particle)  
Thermal correction to Energy= 0.733931  
Thermal correction to Enthalpy= 0.734875  
Thermal correction to Gibbs Free Energy= 0.607666  
Sum of electronic and zero-point Energies= -2717.368508  
Sum of electronic and thermal Energies= -2717.323242  
Sum of electronic and thermal Enthalpies= -2717.322298  
Sum of electronic and thermal Free Energies= -2717.449507  
M06/6-311++G(d,p)-SDD/SMD//m06/6-31G(d)-LANL2DZ energy in acetonitrile solvent = -2720.2568489

### TS1c'

-----

| Center<br>Number | Atomic<br>Number | Atomic<br>Type | Coordinates (Angstroms) |           |           |
|------------------|------------------|----------------|-------------------------|-----------|-----------|
|                  |                  |                | X                       | Y         | Z         |
| 1                | 26               | 0              | 0.474693                | -3.016786 | 0.006983  |
| 2                | 15               | 0              | 1.959300                | 0.040074  | 0.027745  |
| 3                | 15               | 0              | -1.818797               | -0.460362 | -0.066170 |
| 4                | 6                | 0              | 3.407691                | 2.131607  | 1.122628  |
| 5                | 6                | 0              | 2.996710                | -0.115244 | -1.489330 |
| 6                | 6                | 0              | 3.084909                | -0.193595 | -3.912718 |
| 7                | 6                | 0              | 3.166745                | 0.755860  | 1.218526  |
| 8                | 6                | 0              | 4.459280                | -0.400190 | -3.860610 |
| 9                | 6                | 0              | 4.380313                | -0.316840 | -1.449991 |
| 10               | 6                | 0              | 2.360436                | -0.047117 | -2.732921 |
| 11               | 6                | 0              | 5.105951                | -0.459046 | -2.627712 |



|    |    |   |           |           |           |
|----|----|---|-----------|-----------|-----------|
| 12 | 6  | 0 | 3.831366  | 0.019803  | 2.202724  |
| 13 | 6  | 0 | 4.716669  | 0.649163  | 3.074745  |
| 14 | 6  | 0 | -1.263860 | -2.133586 | -0.545189 |
| 15 | 6  | 0 | -1.517317 | -3.403282 | 0.069358  |
| 16 | 6  | 0 | -2.299117 | -0.709161 | 1.697734  |
| 17 | 6  | 0 | 2.114608  | -4.004304 | 0.700019  |
| 18 | 6  | 0 | -0.434287 | -2.380723 | -1.688720 |
| 19 | 6  | 0 | -0.845147 | -4.408858 | -0.680995 |
| 20 | 6  | 0 | 4.299852  | 2.756106  | 1.984920  |
| 21 | 6  | 0 | -0.177588 | -3.777420 | -1.769137 |
| 22 | 6  | 0 | -1.538542 | -0.081759 | 2.688837  |
| 23 | 6  | 0 | 1.913066  | -1.701577 | 0.569110  |
| 24 | 6  | 0 | -3.391433 | -1.494093 | 2.082942  |
| 25 | 6  | 0 | 1.296972  | -3.574954 | 1.784800  |
| 26 | 6  | 0 | 2.502121  | -2.854093 | -0.044267 |
| 27 | 6  | 0 | 1.166038  | -2.161021 | 1.703986  |
| 28 | 6  | 0 | -3.478434 | -0.418311 | -0.868085 |
| 29 | 6  | 0 | -3.809112 | -1.243332 | -1.946147 |
| 30 | 6  | 0 | -3.696415 | -1.668949 | 3.428702  |
| 31 | 6  | 0 | -1.841246 | -0.256320 | 4.036552  |
| 32 | 6  | 0 | -2.919391 | -1.053519 | 4.407334  |
| 33 | 6  | 0 | 4.953482  | 2.015384  | 2.967363  |
| 34 | 6  | 0 | -5.643753 | 0.656150  | -1.073087 |
| 35 | 6  | 0 | -4.411204 | 0.537911  | -0.443485 |
| 36 | 6  | 0 | -5.962787 | -0.171490 | -2.147417 |
| 37 | 6  | 0 | -5.042066 | -1.118226 | -2.581736 |
| 38 | 1  | 0 | 0.559390  | -1.537288 | 2.354858  |
| 39 | 1  | 0 | 0.804274  | -4.218357 | 2.506788  |
| 40 | 1  | 0 | 2.353149  | -5.033615 | 0.450479  |
| 41 | 1  | 0 | 3.089698  | -2.845834 | -0.957958 |
| 42 | 1  | 0 | -0.030139 | -1.613659 | -2.343552 |
| 43 | 1  | 0 | 0.466359  | -4.265363 | -2.493534 |
| 44 | 1  | 0 | -0.795683 | -5.463396 | -0.428051 |
| 45 | 1  | 0 | -2.063386 | -3.557559 | 0.994950  |
| 46 | 1  | 0 | 1.283859  | 0.137421  | -2.765338 |
| 47 | 1  | 0 | 2.575416  | -0.135905 | -4.873492 |
| 48 | 1  | 0 | 5.030239  | -0.508142 | -4.781585 |
| 49 | 1  | 0 | 6.182845  | -0.615846 | -2.583919 |
| 50 | 1  | 0 | 4.891763  | -0.367828 | -0.487607 |
| 51 | 1  | 0 | 3.661395  | -1.053865 | 2.286409  |
| 52 | 1  | 0 | 5.227421  | 0.065380  | 3.839498  |
| 53 | 1  | 0 | 5.646276  | 2.504545  | 3.650395  |
| 54 | 1  | 0 | 4.479552  | 3.826582  | 1.896149  |
| 55 | 1  | 0 | 2.883286  | 2.711895  | 0.360599  |
| 56 | 1  | 0 | -4.014386 | -1.963521 | 1.320087  |
| 57 | 1  | 0 | -4.549424 | -2.282610 | 3.715315  |
| 58 | 1  | 0 | -3.162118 | -1.188251 | 5.460364  |
| 59 | 1  | 0 | -1.239578 | 0.240136  | 4.796298  |
| 60 | 1  | 0 | -0.700871 | 0.554754  | 2.389639  |
| 61 | 1  | 0 | -4.171266 | 1.189204  | 0.399589  |
| 62 | 1  | 0 | -6.360101 | 1.397961  | -0.722450 |
| 63 | 1  | 0 | -6.927854 | -0.076758 | -2.642748 |
| 64 | 1  | 0 | -5.285157 | -1.771967 | -3.418391 |
| 65 | 1  | 0 | -3.101017 | -1.997481 | -2.290347 |
| 66 | 46 | 0 | -0.123387 | 1.210203  | -0.451588 |
| 67 | 6  | 0 | 0.609378  | 2.941734  | -1.626150 |
| 68 | 6  | 0 | 0.133113  | 4.145043  | -1.792483 |
| 69 | 6  | 0 | -0.931742 | 3.501473  | -1.007036 |
| 70 | 1  | 0 | 1.418166  | 2.373937  | -2.099671 |
| 71 | 1  | 0 | 0.286507  | 5.066052  | -2.347783 |
| 72 | 6  | 0 | -1.148230 | 4.062536  | 0.424053  |
| 73 | 6  | 0 | -1.541804 | 5.540815  | 0.274757  |
| 74 | 1  | 0 | -1.737428 | 5.984141  | 1.261963  |
| 75 | 1  | 0 | -0.737789 | 6.122735  | -0.197325 |
| 76 | 6  | 0 | -2.190164 | 3.214078  | -1.808256 |
| 77 | 1  | 0 | -2.890109 | 2.530353  | -1.315433 |
| 78 | 1  | 0 | -1.922867 | 2.771208  | -2.774700 |

|    |   |   |           |          |           |
|----|---|---|-----------|----------|-----------|
| 79 | 1 | 0 | -2.728981 | 4.155777 | -2.018122 |
| 80 | 1 | 0 | -2.452460 | 5.666392 | -0.327711 |
| 81 | 6 | 0 | -2.271299 | 3.350386 | 1.177168  |
| 82 | 1 | 0 | -2.339233 | 3.735871 | 2.204973  |
| 83 | 1 | 0 | -3.251586 | 3.508033 | 0.705438  |
| 84 | 1 | 0 | -2.086430 | 2.268356 | 1.234255  |
| 85 | 6 | 0 | 0.122024  | 4.001409 | 1.268915  |
| 86 | 1 | 0 | 0.438291  | 2.960771 | 1.443142  |
| 87 | 1 | 0 | 0.956034  | 4.525477 | 0.783399  |
| 88 | 1 | 0 | -0.054509 | 4.476979 | 2.244779  |

-----  
Zero-point correction= 0.712292 (Hartree/Particle)  
Thermal correction to Energy= 0.756221  
Thermal correction to Enthalpy= 0.757165  
Thermal correction to Gibbs Free Energy= 0.634899  
Sum of electronic and zero-point Energies= -2556.544667  
Sum of electronic and thermal Energies= -2556.500738  
Sum of electronic and thermal Enthalpies= -2556.499794  
Sum of electronic and thermal Free Energies= -2556.622060  
M06/6-311++G(d,p)-SDD/SMD//m06/6-31G(d)-LANL2DZ energy in acetonitrile solvent = -2559.4204818

### INT2c'

| Center<br>Number | Atomic<br>Number | Atomic<br>Type | Coordinates (Angstroms) |           |           |
|------------------|------------------|----------------|-------------------------|-----------|-----------|
|                  |                  |                | X                       | Y         | Z         |
| 1                | 26               | 0              | 1.055463                | -2.823123 | -0.623358 |
| 2                | 15               | 0              | 1.875263                | 0.370988  | -0.025763 |
| 3                | 15               | 0              | -1.587242               | -0.722707 | 0.028745  |
| 4                | 6                | 0              | 2.192190                | 2.423672  | 1.818518  |
| 5                | 6                | 0              | 3.111825                | 0.827126  | -1.304842 |
| 6                | 6                | 0              | 3.575226                | 1.311668  | -3.629578 |
| 7                | 6                | 0              | 2.549222                | 1.102192  | 1.520655  |
| 8                | 6                | 0              | 4.937913                | 1.347010  | -3.352919 |
| 9                | 6                | 0              | 4.482329                | 0.870716  | -1.033596 |
| 10               | 6                | 0              | 2.664641                | 1.058866  | -2.607366 |
| 11               | 6                | 0              | 5.390837                | 1.131509  | -2.052977 |
| 12               | 6                | 0              | 3.355556                | 0.398067  | 2.420056  |
| 13               | 6                | 0              | 3.792148                | 1.001386  | 3.596237  |
| 14               | 6                | 0              | -0.835476               | -2.156080 | -0.821104 |
| 15               | 6                | 0              | -0.828485               | -3.552773 | -0.497112 |
| 16               | 6                | 0              | -1.515036               | -1.162940 | 1.807734  |
| 17               | 6                | 0              | 2.927899                | -3.571298 | -0.331213 |
| 18               | 6                | 0              | -0.121160               | -2.009599 | -2.057640 |
| 19               | 6                | 0              | -0.107757               | -4.244511 | -1.510301 |
| 20               | 6                | 0              | 2.636043                | 3.025507  | 2.990542  |
| 21               | 6                | 0              | 0.328823                | -3.291848 | -2.474397 |
| 22               | 6                | 0              | -0.780180               | -0.312113 | 2.639095  |
| 23               | 6                | 0              | 2.272430                | -1.405087 | 0.163936  |
| 24               | 6                | 0              | -2.080871               | -2.319978 | 2.355633  |
| 25               | 6                | 0              | 2.183985                | -3.606004 | 0.882027  |
| 26               | 6                | 0              | 2.990199                | -2.219994 | -0.772328 |
| 27               | 6                | 0              | 1.771625                | -2.279288 | 1.188408  |
| 28               | 6                | 0              | -3.346037               | -0.977436 | -0.444552 |
| 29               | 6                | 0              | -3.633729               | -1.162533 | -1.801785 |
| 30               | 6                | 0              | -1.873659               | -2.638391 | 3.693196  |
| 31               | 6                | 0              | -0.570582               | -0.629384 | 3.978229  |
| 32               | 6                | 0              | -1.108814               | -1.800200 | 4.502777  |
| 33               | 6                | 0              | 3.432430                | 2.314097  | 3.884267  |
| 34               | 6                | 0              | -5.722022               | -0.963689 | 0.017668  |
| 35               | 6                | 0              | -4.404974               | -0.878306 | 0.460818  |
| 36               | 6                | 0              | -5.997049               | -1.144951 | -1.333276 |
| 37               | 6                | 0              | -4.948037               | -1.246952 | -2.243243 |
| 38               | 1                | 0              | 1.151826                | -1.983454 | 2.032039  |
| 39               | 1                | 0              | 1.920005                | -4.495608 | 1.445027  |
| 40               | 1                | 0              | 3.334676                | -4.430104 | -0.855491 |
| 41               | 1                | 0              | 3.451999                | -1.866231 | -1.689549 |

|    |    |   |           |           |           |
|----|----|---|-----------|-----------|-----------|
| 42 | 1  | 0 | 0.081183  | -1.057244 | -2.543679 |
| 43 | 1  | 0 | 0.945850  | -3.500157 | -3.342278 |
| 44 | 1  | 0 | 0.126361  | -5.304459 | -1.511349 |
| 45 | 1  | 0 | -1.232550 | -4.000597 | 0.404620  |
| 46 | 1  | 0 | 1.591515  | 1.065605  | -2.807674 |
| 47 | 1  | 0 | 3.216517  | 1.493452  | -4.641418 |
| 48 | 1  | 0 | 5.651518  | 1.550103  | -4.150077 |
| 49 | 1  | 0 | 6.456820  | 1.166494  | -1.833137 |
| 50 | 1  | 0 | 4.840505  | 0.695632  | -0.018152 |
| 51 | 1  | 0 | 3.641055  | -0.631171 | 2.203053  |
| 52 | 1  | 0 | 4.416674  | 0.440137  | 4.289958  |
| 53 | 1  | 0 | 3.772013  | 2.782734  | 4.806790  |
| 54 | 1  | 0 | 2.349737  | 4.052855  | 3.210442  |
| 55 | 1  | 0 | 1.548487  | 2.971861  | 1.127246  |
| 56 | 1  | 0 | -2.698359 | -2.970441 | 1.735149  |
| 57 | 1  | 0 | -2.312190 | -3.544866 | 4.108050  |
| 58 | 1  | 0 | -0.943729 | -2.056845 | 5.548078  |
| 59 | 1  | 0 | 0.020584  | 0.037887  | 4.603743  |
| 60 | 1  | 0 | -0.357856 | 0.603925  | 2.218386  |
| 61 | 1  | 0 | -4.204808 | -0.721619 | 1.520670  |
| 62 | 1  | 0 | -6.536595 | -0.882295 | 0.735798  |
| 63 | 1  | 0 | -7.027943 | -1.205962 | -1.678120 |
| 64 | 1  | 0 | -5.153800 | -1.389142 | -3.302982 |
| 65 | 1  | 0 | -2.819913 | -1.230445 | -2.525575 |
| 66 | 46 | 0 | -0.332445 | 1.297651  | -0.502556 |
| 67 | 6  | 0 | 0.395651  | 3.081906  | -1.221612 |
| 68 | 6  | 0 | -0.739600 | 3.714320  | -1.497020 |
| 69 | 6  | 0 | -1.829047 | 2.799196  | -1.012899 |
| 70 | 1  | 0 | 1.420388  | 3.401871  | -1.435149 |
| 71 | 1  | 0 | -0.908239 | 4.688421  | -1.990527 |
| 72 | 6  | 0 | -2.615317 | 3.373982  | 0.190091  |
| 73 | 6  | 0 | -3.484435 | 4.544809  | -0.300800 |
| 74 | 1  | 0 | -3.974504 | 5.041596  | 0.549971  |
| 75 | 1  | 0 | -2.883593 | 5.302124  | -0.824531 |
| 76 | 6  | 0 | -2.690615 | 2.306349  | -2.160510 |
| 77 | 1  | 0 | -3.494329 | 1.625027  | -1.846487 |
| 78 | 1  | 0 | -2.076472 | 1.773735  | -2.899581 |
| 79 | 1  | 0 | -3.162659 | 3.152936  | -2.696238 |
| 80 | 1  | 0 | -4.274744 | 4.206432  | -0.984622 |
| 81 | 6  | 0 | -3.532855 | 2.342998  | 0.840405  |
| 82 | 1  | 0 | -4.125884 | 2.812124  | 1.640518  |
| 83 | 1  | 0 | -4.236637 | 1.892747  | 0.127427  |
| 84 | 1  | 0 | -2.944550 | 1.533034  | 1.296667  |
| 85 | 6  | 0 | -1.678593 | 3.906138  | 1.274506  |
| 86 | 1  | 0 | -1.010772 | 3.110261  | 1.637631  |
| 87 | 1  | 0 | -1.043270 | 4.722434  | 0.906429  |
| 88 | 1  | 0 | -2.264034 | 4.283249  | 2.126726  |

-----  
Zero-point correction= 0.715319 (Hartree/Particle)  
Thermal correction to Energy= 0.758748  
Thermal correction to Enthalpy= 0.759693  
Thermal correction to Gibbs Free Energy= 0.640633  
Sum of electronic and zero-point Energies= -2556.575402  
Sum of electronic and thermal Energies= -2556.531972  
Sum of electronic and thermal Enthalpies= -2556.531028  
Sum of electronic and thermal Free Energies= -2556.650087  
M06/6-311++G(d,p)-SDD/SMD//m06/6-31G(d)-LANL2DZ energy in acetonitrile solvent = -2559.4593806

#### INT4c

| Center<br>Number | Atomic<br>Number | Atomic<br>Type | Coordinates (Angstroms) |           |           |
|------------------|------------------|----------------|-------------------------|-----------|-----------|
|                  |                  |                | X                       | Y         | Z         |
| 1                | 26               | 0              | -1.785056               | -2.913063 | 1.432205  |
| 2                | 15               | 0              | 0.429697                | -1.502698 | -0.664229 |
| 3                | 15               | 0              | -2.475879               | 0.282469  | 0.476318  |
| 4                | 6                | 0              | 2.485883                | -1.763430 | -2.538193 |

|    |   |   |           |           |           |
|----|---|---|-----------|-----------|-----------|
| 5  | 6 | 0 | -0.610982 | -1.961445 | -2.094476 |
| 6  | 6 | 0 | -2.349267 | -1.378271 | -3.680031 |
| 7  | 6 | 0 | 2.107952  | -1.956105 | -1.204877 |
| 8  | 6 | 0 | -2.314866 | -2.669316 | -4.194664 |
| 9  | 6 | 0 | -0.551228 | -3.246424 | -2.650371 |
| 10 | 6 | 0 | -1.490889 | -1.026122 | -2.641818 |
| 11 | 6 | 0 | -1.405240 | -3.597759 | -3.688409 |
| 12 | 6 | 0 | 3.049605  | -2.405892 | -0.275547 |
| 13 | 6 | 0 | 4.355559  | -2.662143 | -0.677427 |
| 14 | 6 | 0 | -3.016771 | -1.398174 | 0.927321  |
| 15 | 6 | 0 | -3.311142 | -1.850608 | 2.257761  |
| 16 | 6 | 0 | -2.873641 | 1.173881  | 2.028331  |
| 17 | 6 | 0 | -0.562799 | -4.476334 | 1.951556  |
| 18 | 6 | 0 | -3.201896 | -2.516922 | 0.044267  |
| 19 | 6 | 0 | -3.660313 | -3.225897 | 2.189609  |
| 20 | 6 | 0 | 3.789407  | -2.033259 | -2.937579 |
| 21 | 6 | 0 | -3.601336 | -3.632782 | 0.827987  |
| 22 | 6 | 0 | -1.864787 | 1.336267  | 2.983945  |
| 23 | 6 | 0 | 0.048671  | -2.645381 | 0.680916  |
| 24 | 6 | 0 | -4.166744 | 1.619645  | 2.313968  |
| 25 | 6 | 0 | -0.363529 | -3.380103 | 2.836072  |
| 26 | 6 | 0 | -0.304856 | -4.035566 | 0.625803  |
| 27 | 6 | 0 | 0.019976  | -2.253034 | 2.062903  |
| 28 | 6 | 0 | -3.738438 | 0.816064  | -0.737138 |
| 29 | 6 | 0 | -4.990317 | 0.195439  | -0.816014 |
| 30 | 6 | 0 | -4.444539 | 2.212682  | 3.541844  |
| 31 | 6 | 0 | -2.146707 | 1.920739  | 4.213505  |
| 32 | 6 | 0 | -3.438790 | 2.358740  | 4.492575  |
| 33 | 6 | 0 | 4.724190  | -2.481563 | -2.007806 |
| 34 | 6 | 0 | -4.383834 | 2.299487  | -2.540051 |
| 35 | 6 | 0 | -3.444455 | 1.869770  | -1.609605 |
| 36 | 6 | 0 | -5.625991 | 1.674994  | -2.613387 |
| 37 | 6 | 0 | -5.927296 | 0.625509  | -1.750291 |
| 38 | 1 | 0 | 0.216203  | -1.250903 | 2.433124  |
| 39 | 1 | 0 | -0.528797 | -3.389157 | 3.908021  |
| 40 | 1 | 0 | -0.915212 | -5.463473 | 2.231789  |
| 41 | 1 | 0 | -0.429636 | -4.630420 | -0.272236 |
| 42 | 1 | 0 | -3.042167 | -2.514251 | -1.030145 |
| 43 | 1 | 0 | -3.770216 | -4.637483 | 0.454862  |
| 44 | 1 | 0 | -3.884943 | -3.863930 | 3.037686  |
| 45 | 1 | 0 | -3.234695 | -1.252951 | 3.161168  |
| 46 | 1 | 0 | -1.520161 | -0.012617 | -2.242818 |
| 47 | 1 | 0 | -3.044310 | -0.639128 | -4.076330 |
| 48 | 1 | 0 | -2.984461 | -2.952908 | -5.004262 |
| 49 | 1 | 0 | -1.357195 | -4.599565 | -4.110866 |
| 50 | 1 | 0 | 0.177207  | -3.969471 | -2.283073 |
| 51 | 1 | 0 | 2.765796  | -2.552958 | 0.766510  |
| 52 | 1 | 0 | 5.088448  | -3.004913 | 0.050893  |
| 53 | 1 | 0 | 5.745062  | -2.694994 | -2.321158 |
| 54 | 1 | 0 | 4.075740  | -1.893704 | -3.978238 |
| 55 | 1 | 0 | 1.760470  | -1.402484 | -3.268577 |
| 56 | 1 | 0 | -4.960370 | 1.502651  | 1.576038  |
| 57 | 1 | 0 | -5.452822 | 2.561512  | 3.756241  |
| 58 | 1 | 0 | -3.659973 | 2.821649  | 5.452256  |
| 59 | 1 | 0 | -1.356954 | 2.041436  | 4.952561  |
| 60 | 1 | 0 | -0.847048 | 1.008801  | 2.758428  |
| 61 | 1 | 0 | -2.471260 | 2.358103  | -1.560820 |
| 62 | 1 | 0 | -4.141448 | 3.124035  | -3.208688 |
| 63 | 1 | 0 | -6.361089 | 2.007627  | -3.343688 |
| 64 | 1 | 0 | -6.898012 | 0.136374  | -1.804337 |
| 65 | 1 | 0 | -5.234747 | -0.628488 | -0.145935 |
| 66 | 6 | 0 | 4.797072  | 0.727129  | 0.548444  |
| 67 | 6 | 0 | 4.261794  | 0.985863  | -0.718512 |
| 68 | 6 | 0 | 2.886956  | 1.057511  | -0.923535 |
| 69 | 6 | 0 | 2.016244  | 0.858028  | 0.141466  |
| 70 | 6 | 0 | 2.529304  | 0.638951  | 1.418610  |
| 71 | 6 | 0 | 3.906218  | 0.570988  | 1.616000  |

|     |    |   |           |           |           |
|-----|----|---|-----------|-----------|-----------|
| 72  | 1  | 0 | 4.935665  | 1.146454  | -1.560319 |
| 73  | 1  | 0 | 2.506756  | 1.240457  | -1.929084 |
| 74  | 1  | 0 | 1.866808  | 0.503623  | 2.276819  |
| 75  | 1  | 0 | 4.294861  | 0.358032  | 2.612097  |
| 76  | 46 | 0 | -0.071641 | 0.734017  | 0.003326  |
| 77  | 6  | 0 | 6.253599  | 0.602594  | 0.751403  |
| 78  | 6  | 0 | 7.057436  | -0.013061 | -0.215797 |
| 79  | 6  | 0 | 6.862555  | 1.082185  | 1.916608  |
| 80  | 6  | 0 | 8.427061  | -0.145900 | -0.022969 |
| 81  | 1  | 0 | 6.592070  | -0.417296 | -1.115967 |
| 82  | 6  | 0 | 8.231864  | 0.949207  | 2.110201  |
| 83  | 1  | 0 | 6.257867  | 1.590838  | 2.667503  |
| 84  | 6  | 0 | 9.019278  | 0.333989  | 1.141377  |
| 85  | 1  | 0 | 9.035227  | -0.633399 | -0.783130 |
| 86  | 1  | 0 | 8.688240  | 1.336929  | 3.019324  |
| 87  | 1  | 0 | 10.092086 | 0.230514  | 1.292466  |
| 88  | 6  | 0 | -0.803261 | 2.903172  | 0.164268  |
| 89  | 6  | 0 | 0.532330  | 2.965597  | 0.312669  |
| 90  | 6  | 0 | -0.030816 | 3.587129  | -0.935801 |
| 91  | 1  | 0 | -1.707487 | 3.040344  | 0.750977  |
| 92  | 1  | 0 | 1.302447  | 3.119508  | 1.058931  |
| 93  | 6  | 0 | -0.128091 | 5.132964  | -0.979502 |
| 94  | 6  | 0 | -1.456655 | 5.529809  | -1.629682 |
| 95  | 1  | 0 | -1.556549 | 6.623744  | -1.654453 |
| 96  | 1  | 0 | -1.538014 | 5.176184  | -2.666380 |
| 97  | 6  | 0 | 0.172535  | 2.934045  | -2.288970 |
| 98  | 1  | 0 | -0.581476 | 3.262456  | -3.018044 |
| 99  | 1  | 0 | 0.111515  | 1.838649  | -2.218067 |
| 100 | 1  | 0 | 1.159136  | 3.180253  | -2.701926 |
| 101 | 1  | 0 | -2.314138 | 5.132924  | -1.064816 |
| 102 | 6  | 0 | 1.038980  | 5.710021  | -1.783901 |
| 103 | 1  | 0 | 0.984892  | 5.452125  | -2.849083 |
| 104 | 1  | 0 | 1.036364  | 6.806314  | -1.716368 |
| 105 | 1  | 0 | 2.004055  | 5.353589  | -1.393950 |
| 106 | 6  | 0 | -0.081820 | 5.744341  | 0.421863  |
| 107 | 1  | 0 | -0.909129 | 5.405489  | 1.060307  |
| 108 | 1  | 0 | 0.862341  | 5.517953  | 0.937633  |
| 109 | 1  | 0 | -0.156328 | 6.836700  | 0.345938  |

-----  
Zero-point correction= 0.888156 (Hartree/Particle)  
Thermal correction to Energy= 0.941576  
Thermal correction to Enthalpy= 0.942520  
Thermal correction to Gibbs Free Energy= 0.801220  
Sum of electronic and zero-point Energies= -3018.531164  
Sum of electronic and thermal Energies= -3018.477744  
Sum of electronic and thermal Enthalpies= -3018.476800  
Sum of electronic and thermal Free Energies= -3018.618100  
M06/6-311++G(d,p)-SDD/SMD//m06/6-31G(d)-LANL2DZ energy in acetonitrile solvent = -3021.7535142

### TS2c

| Center Number | Atomic Number | Atomic Type | Coordinates (Angstroms) |           |           |
|---------------|---------------|-------------|-------------------------|-----------|-----------|
|               |               |             | X                       | Y         | Z         |
| 1             | 26            | 0           | 1.845411                | -2.909577 | -1.413241 |
| 2             | 15            | 0           | -0.401109               | -1.520121 | 0.657008  |
| 3             | 15            | 0           | 2.468519                | 0.314050  | -0.488452 |
| 4             | 6             | 0           | -2.500707               | -1.813435 | 2.487273  |
| 5             | 6             | 0           | 0.613585                | -1.974784 | 2.107419  |
| 6             | 6             | 0           | 2.339377                | -1.368674 | 3.700438  |
| 7             | 6             | 0           | -2.096315               | -1.961756 | 1.155964  |
| 8             | 6             | 0           | 2.306436                | -2.655232 | 4.226890  |
| 9             | 6             | 0           | 0.556489                | -3.254642 | 2.674428  |
| 10            | 6             | 0           | 1.487007                | -1.031171 | 2.652784  |
| 11            | 6             | 0           | 1.404447                | -3.592196 | 3.722320  |
| 12            | 6             | 0           | -3.021092               | -2.380085 | 0.195174  |
| 13            | 6             | 0           | -4.332189               | -2.656950 | 0.564393  |

|    |    |   |           |           |           |
|----|----|---|-----------|-----------|-----------|
| 14 | 6  | 0 | 3.038513  | -1.361323 | -0.918433 |
| 15 | 6  | 0 | 3.349531  | -1.820122 | -2.243171 |
| 16 | 6  | 0 | 2.851796  | 1.203781  | -2.042683 |
| 17 | 6  | 0 | 0.663973  | -4.506611 | -1.921309 |
| 18 | 6  | 0 | 3.244728  | -2.466981 | -0.022931 |
| 19 | 6  | 0 | 3.731141  | -3.185780 | -2.159323 |
| 20 | 6  | 0 | -3.809830 | -2.103354 | 2.854233  |
| 21 | 6  | 0 | 3.674917  | -3.580411 | -0.793991 |
| 22 | 6  | 0 | 1.838850  | 1.357338  | -2.994773 |
| 23 | 6  | 0 | 0.002795  | -2.680533 | -0.668299 |
| 24 | 6  | 0 | 4.142642  | 1.651461  | -2.334967 |
| 25 | 6  | 0 | 0.440881  | -3.423433 | -2.816371 |
| 26 | 6  | 0 | 0.390338  | -4.060248 | -0.600246 |
| 27 | 6  | 0 | 0.027612  | -2.299354 | -2.053723 |
| 28 | 6  | 0 | 3.706224  | 0.880163  | 0.732971  |
| 29 | 6  | 0 | 4.964446  | 0.276745  | 0.836421  |
| 30 | 6  | 0 | 4.413584  | 2.240512  | -3.566145 |
| 31 | 6  | 0 | 2.114082  | 1.937488  | -4.228054 |
| 32 | 6  | 0 | 3.403460  | 2.379175  | -4.513514 |
| 33 | 6  | 0 | -4.724762 | -2.527297 | 1.893912  |
| 34 | 6  | 0 | 4.304975  | 2.394145  | 2.524446  |
| 35 | 6  | 0 | 3.385413  | 1.942528  | 1.584738  |
| 36 | 6  | 0 | 5.553874  | 1.786538  | 2.623712  |
| 37 | 6  | 0 | 5.882574  | 0.731369  | 1.777580  |
| 38 | 1  | 0 | -0.186278 | -1.303850 | -2.432418 |
| 39 | 1  | 0 | 0.610606  | -3.437915 | -3.887584 |
| 40 | 1  | 0 | 1.041699  | -5.487116 | -2.191736 |
| 41 | 1  | 0 | 0.530717  | -4.641891 | 0.304261  |
| 42 | 1  | 0 | 3.078397  | -2.459098 | 1.050607  |
| 43 | 1  | 0 | 3.864663  | -4.577364 | -0.410237 |
| 44 | 1  | 0 | 3.974386  | -3.826772 | -3.000002 |
| 45 | 1  | 0 | 3.263638  | -1.233280 | -3.152807 |
| 46 | 1  | 0 | 1.517797  | -0.021507 | 2.243452  |
| 47 | 1  | 0 | 3.028284  | -0.621163 | 4.092179  |
| 48 | 1  | 0 | 2.971322  | -2.928995 | 5.043766  |
| 49 | 1  | 0 | 1.358572  | -4.590449 | 4.153449  |
| 50 | 1  | 0 | -0.165218 | -3.984167 | 2.306015  |
| 51 | 1  | 0 | -2.718273 | -2.491496 | -0.846118 |
| 52 | 1  | 0 | -5.050304 | -2.978053 | -0.188163 |
| 53 | 1  | 0 | -5.748902 | -2.760707 | 2.181696  |
| 54 | 1  | 0 | -4.114834 | -2.002383 | 3.894090  |
| 55 | 1  | 0 | -1.789325 | -1.478562 | 3.243253  |
| 56 | 1  | 0 | 4.939531  | 1.539151  | -1.599731 |
| 57 | 1  | 0 | 5.419745  | 2.592029  | -3.785988 |
| 58 | 1  | 0 | 3.619364  | 2.838940  | -5.475922 |
| 59 | 1  | 0 | 1.321509  | 2.051742  | -4.965140 |
| 60 | 1  | 0 | 0.823867  | 1.026559  | -2.761425 |
| 61 | 1  | 0 | 2.407853  | 2.417742  | 1.504856  |
| 62 | 1  | 0 | 4.044233  | 3.223829  | 3.180027  |
| 63 | 1  | 0 | 6.273461  | 2.137691  | 3.360829  |
| 64 | 1  | 0 | 6.859147  | 0.256729  | 1.851442  |
| 65 | 1  | 0 | 5.228666  | -0.552860 | 0.181101  |
| 66 | 6  | 0 | -4.768810 | 0.732993  | -0.533097 |
| 67 | 6  | 0 | -4.247769 | 0.987374  | 0.740324  |
| 68 | 6  | 0 | -2.879638 | 1.136503  | 0.950253  |
| 69 | 6  | 0 | -1.997422 | 1.036228  | -0.120562 |
| 70 | 6  | 0 | -2.501585 | 0.812425  | -1.403695 |
| 71 | 6  | 0 | -3.866797 | 0.649381  | -1.602533 |
| 72 | 1  | 0 | -4.928768 | 1.100463  | 1.583545  |
| 73 | 1  | 0 | -2.514464 | 1.326406  | 1.958942  |
| 74 | 1  | 0 | -1.830988 | 0.774262  | -2.265214 |
| 75 | 1  | 0 | -4.239595 | 0.435506  | -2.604174 |
| 76 | 46 | 0 | 0.115409  | 0.736189  | 0.005825  |
| 77 | 6  | 0 | -6.217103 | 0.550290  | -0.747514 |
| 78 | 6  | 0 | -7.009504 | -0.082896 | 0.218227  |
| 79 | 6  | 0 | -6.832449 | 0.997020  | -1.923059 |
| 80 | 6  | 0 | -8.371025 | -0.267875 | 0.012597  |

|     |   |   |            |           |           |
|-----|---|---|------------|-----------|-----------|
| 81  | 1 | 0 | -6.541462  | -0.458915 | 1.128528  |
| 82  | 6 | 0 | -8.193665  | 0.812147  | -2.129350 |
| 83  | 1 | 0 | -6.242056  | 1.523146  | -2.673080 |
| 84  | 6 | 0 | -8.968214  | 0.177331  | -1.162908 |
| 85  | 1 | 0 | -8.968745  | -0.768853 | 0.772234  |
| 86  | 1 | 0 | -8.654106  | 1.175095  | -3.046546 |
| 87  | 1 | 0 | -10.034702 | 0.032333  | -1.324216 |
| 88  | 6 | 0 | 0.662705   | 2.840203  | -0.175877 |
| 89  | 6 | 0 | -0.706581  | 2.899757  | -0.262566 |
| 90  | 6 | 0 | -0.074943  | 3.522631  | 0.950154  |
| 91  | 1 | 0 | 1.479394   | 3.107786  | -0.842814 |
| 92  | 1 | 0 | -1.432195  | 3.204748  | -1.005714 |
| 93  | 6 | 0 | -0.001951  | 5.071184  | 0.983395  |
| 94  | 6 | 0 | 1.355336   | 5.486682  | 1.558918  |
| 95  | 1 | 0 | 1.426395   | 6.581940  | 1.610122  |
| 96  | 1 | 0 | 1.512364   | 5.104782  | 2.576684  |
| 97  | 6 | 0 | -0.200594  | 2.877464  | 2.316717  |
| 98  | 1 | 0 | 0.595622   | 3.212916  | 2.995739  |
| 99  | 1 | 0 | -0.133462  | 1.782558  | 2.254165  |
| 100 | 1 | 0 | -1.159461  | 3.125673  | 2.788702  |
| 101 | 1 | 0 | 2.184949   | 5.131036  | 0.929114  |
| 102 | 6 | 0 | -1.130930  | 5.629752  | 1.853025  |
| 103 | 1 | 0 | -1.005307  | 5.386533  | 2.915396  |
| 104 | 1 | 0 | -1.158389  | 6.724892  | 1.773804  |
| 105 | 1 | 0 | -2.109101  | 5.246706  | 1.525635  |
| 106 | 6 | 0 | -0.136450  | 5.689499  | -0.409578 |
| 107 | 1 | 0 | 0.635591   | 5.340481  | -1.108266 |
| 108 | 1 | 0 | -1.120909  | 5.489793  | -0.855654 |
| 109 | 1 | 0 | -0.034017  | 6.779533  | -0.332904 |

-----  
Zero-point correction= 0.888458 (Hartree/Particle)  
Thermal correction to Energy= 0.940939  
Thermal correction to Enthalpy= 0.941883  
Thermal correction to Gibbs Free Energy= 0.803148  
Sum of electronic and zero-point Energies= -3018.529226  
Sum of electronic and thermal Energies= -3018.476744  
Sum of electronic and thermal Enthalpies= -3018.475800  
Sum of electronic and thermal Free Energies= -3018.614536  
M06/6-311++G(d,p)-SDD/SMD//m06/6-31G(d)-LANL2DZ energy in acetonitrile solvent = -3021.7499951

### TS2c'

-----

| Center<br>Number | Atomic<br>Number | Atomic<br>Type | Coordinates (Angstroms) |           |           |
|------------------|------------------|----------------|-------------------------|-----------|-----------|
|                  |                  |                | X                       | Y         | Z         |
| 1                | 26               | 0              | -1.740452               | -2.925076 | 1.257963  |
| 2                | 15               | 0              | 0.402506                | -1.323698 | -0.751861 |
| 3                | 15               | 0              | -2.499018               | 0.335514  | 0.563336  |
| 4                | 6                | 0              | 2.466163                | -1.374976 | -2.635526 |
| 5                | 6                | 0              | -0.617659               | -1.744314 | -2.209987 |
| 6                | 6                | 0              | -2.386657               | -1.139461 | -3.753761 |
| 7                | 6                | 0              | 2.094274                | -1.689503 | -1.323628 |
| 8                | 6                | 0              | -2.287662               | -2.387014 | -4.359409 |
| 9                | 6                | 0              | -0.495004               | -2.981734 | -2.855381 |
| 10               | 6                | 0              | -1.548942               | -0.820790 | -2.688441 |
| 11               | 6                | 0              | -1.333513               | -3.302811 | -3.915773 |
| 12               | 6                | 0              | 3.038866                | -2.231038 | -0.448456 |
| 13               | 6                | 0              | 4.338573                | -2.464882 | -0.885130 |
| 14               | 6                | 0              | -2.993066               | -1.393165 | 0.871926  |
| 15               | 6                | 0              | -3.278348               | -1.949765 | 2.165355  |
| 16               | 6                | 0              | -2.921324               | 1.069036  | 2.187666  |
| 17               | 6                | 0              | -0.494158               | -4.503992 | 1.651396  |
| 18               | 6                | 0              | -3.164697               | -2.448070 | -0.091154 |
| 19               | 6                | 0              | -3.609387               | -3.319932 | 1.996256  |
| 20               | 6                | 0              | 3.762046                | -1.622992 | -3.071654 |
| 21               | 6                | 0              | -3.548159               | -3.624218 | 0.608482  |
| 22               | 6                | 0              | -1.930970               | 1.167513  | 3.170267  |

|    |    |   |           |           |           |
|----|----|---|-----------|-----------|-----------|
| 23 | 6  | 0 | 0.079196  | -2.578915 | 0.507688  |
| 24 | 6  | 0 | -4.235567 | 1.426873  | 2.499597  |
| 25 | 6  | 0 | -0.298005 | -3.471537 | 2.610147  |
| 26 | 6  | 0 | -0.255583 | -3.966245 | 0.357955  |
| 27 | 6  | 0 | 0.062617  | -2.287101 | 1.915269  |
| 28 | 6  | 0 | -3.786752 | 0.955711  | -0.581193 |
| 29 | 6  | 0 | -4.936141 | 0.217289  | -0.881401 |
| 30 | 6  | 0 | -4.551966 | 1.871723  | 3.779291  |
| 31 | 6  | 0 | -2.251021 | 1.605177  | 4.450776  |
| 32 | 6  | 0 | -3.563430 | 1.957144  | 4.755216  |
| 33 | 6  | 0 | 4.697642  | -2.170749 | -2.197616 |
| 34 | 6  | 0 | -4.576245 | 2.731374  | -2.026063 |
| 35 | 6  | 0 | -3.619726 | 2.220607  | -1.156883 |
| 36 | 6  | 0 | -5.711838 | 1.984757  | -2.329791 |
| 37 | 6  | 0 | -5.891689 | 0.732185  | -1.752379 |
| 38 | 1  | 0 | 0.253141  | -1.311999 | 2.354544  |
| 39 | 1  | 0 | -0.450567 | -3.559416 | 3.680399  |
| 40 | 1  | 0 | -0.831507 | -5.513150 | 1.863424  |
| 41 | 1  | 0 | -0.387618 | -4.494897 | -0.579984 |
| 42 | 1  | 0 | -3.009645 | -2.367132 | -1.162872 |
| 43 | 1  | 0 | -3.704400 | -4.600585 | 0.161727  |
| 44 | 1  | 0 | -3.819624 | -4.023071 | 2.795104  |
| 45 | 1  | 0 | -3.209313 | -1.423572 | 3.112138  |
| 46 | 1  | 0 | -1.633274 | 0.156113  | -2.214635 |
| 47 | 1  | 0 | -3.113052 | -0.407813 | -4.105045 |
| 48 | 1  | 0 | -2.940909 | -2.644867 | -5.190713 |
| 49 | 1  | 0 | -1.236892 | -4.269616 | -4.406189 |
| 50 | 1  | 0 | 0.270960  | -3.690171 | -2.539616 |
| 51 | 1  | 0 | 2.764236  | -2.471660 | 0.578842  |
| 52 | 1  | 0 | 5.073247  | -2.880351 | -0.197280 |
| 53 | 1  | 0 | 5.711187  | -2.372255 | -2.541543 |
| 54 | 1  | 0 | 4.040609  | -1.392241 | -4.098211 |
| 55 | 1  | 0 | 1.736472  | -0.946492 | -3.324183 |
| 56 | 1  | 0 | -5.017064 | 1.350543  | 1.743641  |
| 57 | 1  | 0 | -5.577097 | 2.150585  | 4.015057  |
| 58 | 1  | 0 | -3.815277 | 2.303146  | 5.755722  |
| 59 | 1  | 0 | -1.474957 | 1.678839  | 5.210282  |
| 60 | 1  | 0 | -0.899033 | 0.906221  | 2.925518  |
| 61 | 1  | 0 | -2.733270 | 2.810056  | -0.918384 |
| 62 | 1  | 0 | -4.435598 | 3.716067  | -2.468935 |
| 63 | 1  | 0 | -6.458335 | 2.382198  | -3.014725 |
| 64 | 1  | 0 | -6.782028 | 0.148843  | -1.979451 |
| 65 | 1  | 0 | -5.092327 | -0.761713 | -0.431149 |
| 66 | 6  | 0 | 4.737911  | 0.736619  | 0.705113  |
| 67 | 6  | 0 | 4.246879  | 1.130278  | -0.543128 |
| 68 | 6  | 0 | 2.885070  | 1.324858  | -0.759937 |
| 69 | 6  | 0 | 1.976883  | 1.134872  | 0.276427  |
| 70 | 6  | 0 | 2.453965  | 0.755920  | 1.534191  |
| 71 | 6  | 0 | 3.812166  | 0.551076  | 1.741040  |
| 72 | 1  | 0 | 4.944681  | 1.304720  | -1.362118 |
| 73 | 1  | 0 | 2.551722  | 1.614666  | -1.755715 |
| 74 | 1  | 0 | 1.765596  | 0.630197  | 2.373379  |
| 75 | 1  | 0 | 4.160665  | 0.221474  | 2.719889  |
| 76 | 46 | 0 | -0.154217 | 0.876353  | 0.071499  |
| 77 | 6  | 0 | 6.179261  | 0.514383  | 0.927456  |
| 78 | 6  | 0 | 6.978716  | -0.056015 | -0.070949 |
| 79 | 6  | 0 | 6.779644  | 0.865459  | 2.142135  |
| 80 | 6  | 0 | 8.334552  | -0.272867 | 0.141561  |
| 81 | 1  | 0 | 6.518986  | -0.357433 | -1.013163 |
| 82 | 6  | 0 | 8.135741  | 0.651238  | 2.353928  |
| 83 | 1  | 0 | 6.181220  | 1.341240  | 2.919007  |
| 84 | 6  | 0 | 8.918025  | 0.079297  | 1.354929  |
| 85 | 1  | 0 | 8.939006  | -0.724971 | -0.643001 |
| 86 | 1  | 0 | 8.586569  | 0.941119  | 3.301369  |
| 87 | 1  | 0 | 9.980334  | -0.089365 | 1.520763  |
| 88 | 6  | 0 | -0.705266 | 2.912886  | 0.592206  |
| 89 | 6  | 0 | 0.674112  | 2.936922  | 0.702978  |



|     |   |   |           |          |           |
|-----|---|---|-----------|----------|-----------|
| 90  | 6 | 0 | 0.048741  | 3.924305 | -0.238654 |
| 91  | 1 | 0 | -1.488625 | 3.039025 | 1.337467  |
| 92  | 1 | 0 | 1.367597  | 3.076701 | 1.523769  |
| 93  | 6 | 0 | 0.000609  | 5.307311 | 0.407321  |
| 94  | 6 | 0 | 0.175655  | 3.967332 | -1.776603 |
| 95  | 6 | 0 | -0.847170 | 4.966813 | -2.334829 |
| 96  | 1 | 0 | -1.869237 | 4.720377 | -2.007954 |
| 97  | 1 | 0 | -0.637680 | 6.000824 | -2.035442 |
| 98  | 1 | 0 | -0.833391 | 4.939649 | -3.432794 |
| 99  | 6 | 0 | 1.585670  | 4.439722 | -2.148012 |
| 100 | 1 | 0 | 1.698287  | 4.480021 | -3.240370 |
| 101 | 1 | 0 | 1.799428  | 5.445760 | -1.766021 |
| 102 | 1 | 0 | 2.353158  | 3.764168 | -1.748411 |
| 103 | 6 | 0 | -0.100467 | 2.637051 | -2.472185 |
| 104 | 1 | 0 | 0.070599  | 2.749397 | -3.552006 |
| 105 | 1 | 0 | 0.547843  | 1.819348 | -2.128043 |
| 106 | 1 | 0 | -1.147175 | 2.329279 | -2.341930 |
| 107 | 1 | 0 | 0.742037  | 5.993665 | -0.018534 |
| 108 | 1 | 0 | -0.990497 | 5.763739 | 0.280049  |
| 109 | 1 | 0 | 0.188834  | 5.245383 | 1.486331  |

-----

Zero-point correction= 0.890249 (Hartree/Particle)  
Thermal correction to Energy= 0.942253  
Thermal correction to Enthalpy= 0.943197  
Thermal correction to Gibbs Free Energy= 0.807373  
Sum of electronic and zero-point Energies= -3018.518845  
Sum of electronic and thermal Energies= -3018.466842  
Sum of electronic and thermal Enthalpies= -3018.465897  
Sum of electronic and thermal Free Energies= -3018.601722  
M06/6-311++G(d,p)-SDD/SMD//m06/6-31G(d)-LANL2DZ energy in acetonitrile solvent = -3021.7405424

## TS2c''

-----

| Center<br>Number | Atomic<br>Number | Atomic<br>Type | Coordinates (Angstroms) |           |           |
|------------------|------------------|----------------|-------------------------|-----------|-----------|
|                  |                  |                | X                       | Y         | Z         |
| 1                | 26               | 0              | 2.637564                | -2.209892 | -1.782610 |
| 2                | 15               | 0              | 0.057584                | -1.812143 | 0.347329  |
| 3                | 15               | 0              | 2.530131                | 0.791364  | -0.199258 |
| 4                | 6                | 0              | -1.934725               | -3.147259 | 1.828514  |
| 5                | 6                | 0              | 1.099977                | -2.332391 | 1.750506  |
| 6                | 6                | 0              | 2.528899                | -1.700132 | 3.603179  |
| 7                | 6                | 0              | -1.511355               | -2.711601 | 0.570256  |
| 8                | 6                | 0              | 2.819307                | -3.039942 | 3.836765  |
| 9                | 6                | 0              | 1.364603                | -3.681072 | 2.020758  |
| 10               | 6                | 0              | 1.666315                | -1.350580 | 2.567712  |
| 11               | 6                | 0              | 2.226552                | -4.029879 | 3.053103  |
| 12               | 6                | 0              | -2.359275               | -2.855154 | -0.533032 |
| 13               | 6                | 0              | -3.617547               | -3.419540 | -0.376234 |
| 14               | 6                | 0              | 3.477560                | -0.602125 | -0.890996 |
| 15               | 6                | 0              | 3.955821                | -0.721974 | -2.237348 |
| 16               | 6                | 0              | 2.792090                | 2.091920  | -1.467865 |
| 17               | 6                | 0              | 1.833965                | -3.834750 | -2.736483 |
| 18               | 6                | 0              | 3.832424                | -1.813374 | -0.202084 |
| 19               | 6                | 0              | 4.585347                | -1.988136 | -2.373630 |
| 20               | 6                | 0              | -3.189200               | -3.731074 | 1.977311  |
| 21               | 6                | 0              | 4.517352                | -2.655783 | -1.119661 |
| 22               | 6                | 0              | 2.013829                | 2.053551  | -2.632209 |
| 23               | 6                | 0              | 0.757476                | -2.527198 | -1.162454 |
| 24               | 6                | 0              | 3.711147                | 3.128809  | -1.298871 |
| 25               | 6                | 0              | 1.420113                | -2.634755 | -3.378910 |
| 26               | 6                | 0              | 1.425571                | -3.778978 | -1.376294 |
| 27               | 6                | 0              | 0.751054                | -1.830742 | -2.418922 |
| 28               | 6                | 0              | 3.555059                | 1.345325  | 1.214332  |
| 29               | 6                | 0              | 4.854421                | 0.880464  | 1.436670  |
| 30               | 6                | 0              | 3.846718                | 4.111277  | -2.277258 |
| 31               | 6                | 0              | 2.157633                | 3.028685  | -3.612011 |

|    |    |   |            |           |           |
|----|----|---|------------|-----------|-----------|
| 32 | 6  | 0 | 3.073015   | 4.063769  | -3.431606 |
| 33 | 6  | 0 | -4.031731  | -3.863075 | 0.878296  |
| 34 | 6  | 0 | 3.747187   | 2.755304  | 3.176258  |
| 35 | 6  | 0 | 3.012309   | 2.290872  | 2.092221  |
| 36 | 6  | 0 | 5.035442   | 2.275045  | 3.398803  |
| 37 | 6  | 0 | 5.587058   | 1.342577  | 2.526519  |
| 38 | 1  | 0 | 0.327910   | -0.841353 | -2.577605 |
| 39 | 1  | 0 | 1.625882   | -2.360259 | -4.407926 |
| 40 | 1  | 0 | 2.418298   | -4.629189 | -3.188803 |
| 41 | 1  | 0 | 1.643166   | -4.527137 | -0.621574 |
| 42 | 1  | 0 | 3.596466   | -2.050739 | 0.831990  |
| 43 | 1  | 0 | 4.869674   | -3.660915 | -0.912745 |
| 44 | 1  | 0 | 4.998785   | -2.393719 | -3.291017 |
| 45 | 1  | 0 | 3.821586   | 0.013798  | -3.024086 |
| 46 | 1  | 0 | 1.439602   | -0.299448 | 2.379372  |
| 47 | 1  | 0 | 2.972408   | -0.922906 | 4.223678  |
| 48 | 1  | 0 | 3.495950   | -3.319084 | 4.642083  |
| 49 | 1  | 0 | 2.432979   | -5.079427 | 3.254067  |
| 50 | 1  | 0 | 0.878987   | -4.462367 | 1.436323  |
| 51 | 1  | 0 | -2.043575  | -2.501942 | -1.515450 |
| 52 | 1  | 0 | -4.281992  | -3.508954 | -1.233820 |
| 53 | 1  | 0 | -5.015708  | -4.314191 | 0.997032  |
| 54 | 1  | 0 | -3.509475  | -4.080284 | 2.957179  |
| 55 | 1  | 0 | -1.286751  | -3.031035 | 2.697114  |
| 56 | 1  | 0 | 4.324329   | 3.172333  | -0.399395 |
| 57 | 1  | 0 | 4.566783   | 4.915047  | -2.135634 |
| 58 | 1  | 0 | 3.183961   | 4.831930  | -4.194507 |
| 59 | 1  | 0 | 1.552693   | 2.984988  | -4.515992 |
| 60 | 1  | 0 | 1.289181   | 1.248238  | -2.774051 |
| 61 | 1  | 0 | 2.011224   | 2.683060  | 1.910740  |
| 62 | 1  | 0 | 3.314925   | 3.492783  | 3.850060  |
| 63 | 1  | 0 | 5.611306   | 2.632146  | 4.250388  |
| 64 | 1  | 0 | 6.597417   | 0.972399  | 2.689989  |
| 65 | 1  | 0 | 5.301683   | 0.157518  | 0.756685  |
| 66 | 6  | 0 | -4.793458  | 0.132359  | -0.278840 |
| 67 | 6  | 0 | -4.175145  | -0.071501 | 0.960871  |
| 68 | 6  | 0 | -2.798261  | 0.064524  | 1.111360  |
| 69 | 6  | 0 | -1.996883  | 0.408973  | 0.024517  |
| 70 | 6  | 0 | -2.603123  | 0.635457  | -1.211505 |
| 71 | 6  | 0 | -3.983098  | 0.497682  | -1.359780 |
| 72 | 1  | 0 | -4.784573  | -0.335985 | 1.825546  |
| 73 | 1  | 0 | -2.352652  | -0.137780 | 2.088217  |
| 74 | 1  | 0 | -2.004254  | 0.906406  | -2.085516 |
| 75 | 1  | 0 | -4.433430  | 0.641291  | -2.342513 |
| 76 | 46 | 0 | 0.048929   | 0.549806  | 0.118412  |
| 77 | 6  | 0 | -6.247824  | -0.061681 | -0.441864 |
| 78 | 6  | 0 | -6.909890  | -1.083809 | 0.249124  |
| 79 | 6  | 0 | -6.997481  | 0.760957  | -1.290178 |
| 80 | 6  | 0 | -8.277771  | -1.275086 | 0.099148  |
| 81 | 1  | 0 | -6.336233  | -1.751709 | 0.892708  |
| 82 | 6  | 0 | -8.365491  | 0.569877  | -1.441292 |
| 83 | 1  | 0 | -6.504563  | 1.578802  | -1.816127 |
| 84 | 6  | 0 | -9.011149  | -0.448752 | -0.746786 |
| 85 | 1  | 0 | -8.773836  | -2.079553 | 0.639765  |
| 86 | 1  | 0 | -8.933548  | 1.226184  | -2.098342 |
| 87 | 1  | 0 | -10.082834 | -0.597594 | -0.864328 |
| 88 | 6  | 0 | -0.119795  | 2.661485  | -0.214175 |
| 89 | 6  | 0 | 0.066585   | 3.919593  | 0.243964  |
| 90 | 6  | 0 | -1.042703  | 3.566189  | 1.044224  |
| 91 | 1  | 0 | -0.161812  | 2.622051  | -1.315025 |
| 92 | 1  | 0 | 0.314504   | 4.845057  | -0.279349 |
| 93 | 6  | 0 | -2.339874  | 4.363005  | 0.823611  |
| 94 | 6  | 0 | -2.125931  | 5.750759  | 1.442988  |
| 95 | 1  | 0 | -3.036519  | 6.351684  | 1.318908  |
| 96 | 1  | 0 | -1.914300  | 5.691522  | 2.519278  |
| 97 | 6  | 0 | -0.928878  | 2.799388  | 2.328628  |
| 98 | 1  | 0 | 0.052088   | 2.327735  | 2.440790  |

|     |   |   |           |          |           |
|-----|---|---|-----------|----------|-----------|
| 99  | 1 | 0 | -1.700848 | 2.028682 | 2.414425  |
| 100 | 1 | 0 | -1.071052 | 3.508184 | 3.159776  |
| 101 | 1 | 0 | -1.301992 | 6.295629 | 0.961891  |
| 102 | 6 | 0 | -3.545953 | 3.690984 | 1.481886  |
| 103 | 1 | 0 | -3.452775 | 3.633864 | 2.573743  |
| 104 | 1 | 0 | -4.446631 | 4.280031 | 1.264534  |
| 105 | 1 | 0 | -3.708750 | 2.676003 | 1.092833  |
| 106 | 6 | 0 | -2.635815 | 4.504682 | -0.670684 |
| 107 | 1 | 0 | -1.846578 | 5.044251 | -1.211558 |
| 108 | 1 | 0 | -2.766091 | 3.517209 | -1.138712 |
| 109 | 1 | 0 | -3.568990 | 5.065518 | -0.808537 |

-----  
Zero-point correction= 0.887077 (Hartree/Particle)  
Thermal correction to Energy= 0.940332  
Thermal correction to Enthalpy= 0.941276  
Thermal correction to Gibbs Free Energy= 0.800081  
Sum of electronic and zero-point Energies= -3018.511888  
Sum of electronic and thermal Energies= -3018.458634  
Sum of electronic and thermal Enthalpies= -3018.457690  
Sum of electronic and thermal Free Energies= -3018.598884  
M06/6-311++G(d,p)-SDD/SMD//m06/6-31G(d)-LANL2DZ energy in acetonitrile solvent = -3021.7321124

### INT5c

-----

| Center<br>Number | Atomic<br>Number | Atomic<br>Type | Coordinates (Angstroms) |           |           |
|------------------|------------------|----------------|-------------------------|-----------|-----------|
|                  |                  |                | X                       | Y         | Z         |
| 1                | 26               | 0              | -1.099599               | -3.178370 | 1.455913  |
| 2                | 15               | 0              | 0.921615                | -1.409852 | -0.517090 |
| 3                | 15               | 0              | -2.399343               | -0.149226 | 0.382533  |
| 4                | 6                | 0              | 3.161222                | -0.499892 | -1.855635 |
| 5                | 6                | 0              | 0.294465                | -2.186080 | -2.048502 |
| 6                | 6                | 0              | -1.278463               | -2.134592 | -3.891054 |
| 7                | 6                | 0              | 2.716873                | -1.343238 | -0.830342 |
| 8                | 6                | 0              | -0.788327               | -3.355795 | -4.341876 |
| 9                | 6                | 0              | 0.812443                | -3.391780 | -2.535202 |
| 10               | 6                | 0              | -0.727954               | -1.549763 | -2.754238 |
| 11               | 6                | 0              | 0.265980                | -3.975815 | -3.671678 |
| 12               | 6                | 0              | 3.640037                | -2.102584 | -0.110736 |
| 13               | 6                | 0              | 4.995270                | -2.031681 | -0.426908 |
| 14               | 6                | 0              | -2.551031               | -1.893331 | 0.870940  |
| 15               | 6                | 0              | -2.831389               | -2.394121 | 2.186961  |
| 16               | 6                | 0              | -3.255448               | 0.729082  | 1.734653  |
| 17               | 6                | 0              | 0.312374                | -4.538398 | 2.046259  |
| 18               | 6                | 0              | -2.479975               | -3.025207 | -0.013302 |
| 19               | 6                | 0              | -2.934979               | -3.808259 | 2.107131  |
| 20               | 6                | 0              | 4.510065                | -0.445048 | -2.177142 |
| 21               | 6                | 0              | -2.725577               | -4.195139 | 0.754298  |
| 22               | 6                | 0              | -2.602474               | 0.857896  | 2.967160  |
| 23               | 6                | 0              | 0.717519                | -2.636390 | 0.795170  |
| 24               | 6                | 0              | -4.499741               | 1.332250  | 1.548548  |
| 25               | 6                | 0              | 0.302431                | -3.426275 | 2.933457  |
| 26               | 6                | 0              | 0.575167                | -4.061478 | 0.732815  |
| 27               | 6                | 0              | 0.554791                | -2.254919 | 2.171847  |
| 28               | 6                | 0              | -3.489797               | -0.021592 | -1.070675 |
| 29               | 6                | 0              | -4.626484               | -0.828613 | -1.199542 |
| 30               | 6                | 0              | -5.090931               | 2.043137  | 2.591296  |
| 31               | 6                | 0              | -3.199778               | 1.558648  | 4.005902  |
| 32               | 6                | 0              | -4.445827               | 2.155107  | 3.817125  |
| 33               | 6                | 0              | 5.428093                | -1.214832 | -1.464445 |
| 34               | 6                | 0              | -4.023827               | 1.050026  | -3.172694 |
| 35               | 6                | 0              | -3.198414               | 0.918410  | -2.061062 |
| 36               | 6                | 0              | -5.145946               | 0.237172  | -3.301688 |
| 37               | 6                | 0              | -5.447429               | -0.698140 | -2.313979 |
| 38               | 1                | 0              | 0.578517                | -1.235731 | 2.549559  |
| 39               | 1                | 0              | 0.081431                | -3.460764 | 3.994795  |
| 40               | 1                | 0              | 0.092472                | -5.567090 | 2.312500  |

|     |    |   |           |           |           |
|-----|----|---|-----------|-----------|-----------|
| 41  | 1  | 0 | 0.580741  | -4.663685 | -0.169502 |
| 42  | 1  | 0 | -2.261727 | -2.991088 | -1.077212 |
| 43  | 1  | 0 | -2.693765 | -5.213146 | 0.380451  |
| 44  | 1  | 0 | -3.092964 | -4.479497 | 2.944561  |
| 45  | 1  | 0 | -2.927198 | -1.796502 | 3.087545  |
| 46  | 1  | 0 | -1.102231 | -0.587777 | -2.403115 |
| 47  | 1  | 0 | -2.087596 | -1.630196 | -4.418031 |
| 48  | 1  | 0 | -1.214269 | -3.820684 | -5.229050 |
| 49  | 1  | 0 | 0.667409  | -4.916753 | -4.043510 |
| 50  | 1  | 0 | 1.655569  | -3.867996 | -2.032479 |
| 51  | 1  | 0 | 3.302557  | -2.759054 | 0.692026  |
| 52  | 1  | 0 | 5.714154  | -2.623194 | 0.137207  |
| 53  | 1  | 0 | 6.487209  | -1.165962 | -1.709300 |
| 54  | 1  | 0 | 4.850468  | 0.202834  | -2.983539 |
| 55  | 1  | 0 | 2.442116  | 0.103460  | -2.416331 |
| 56  | 1  | 0 | -5.008677 | 1.255515  | 0.588257  |
| 57  | 1  | 0 | -6.061177 | 2.512151  | 2.439703  |
| 58  | 1  | 0 | -4.910144 | 2.712575  | 4.628019  |
| 59  | 1  | 0 | -2.688560 | 1.652747  | 4.962041  |
| 60  | 1  | 0 | -1.609598 | 0.423477  | 3.106088  |
| 61  | 1  | 0 | -2.315297 | 1.547861  | -1.955542 |
| 62  | 1  | 0 | -3.788799 | 1.789679  | -3.936541 |
| 63  | 1  | 0 | -5.790932 | 0.332665  | -4.172971 |
| 64  | 1  | 0 | -6.328214 | -1.329687 | -2.410504 |
| 65  | 1  | 0 | -4.871468 | -1.559719 | -0.429436 |
| 66  | 6  | 0 | 4.132997  | 1.928319  | 0.669941  |
| 67  | 6  | 0 | 3.826544  | 3.127270  | -0.001798 |
| 68  | 6  | 0 | 2.537106  | 3.626881  | -0.049904 |
| 69  | 6  | 0 | 1.486442  | 2.966075  | 0.597071  |
| 70  | 6  | 0 | 1.786835  | 1.779566  | 1.284150  |
| 71  | 6  | 0 | 3.085110  | 1.262345  | 1.303063  |
| 72  | 1  | 0 | 4.630631  | 3.695524  | -0.467236 |
| 73  | 1  | 0 | 2.336886  | 4.565738  | -0.567274 |
| 74  | 1  | 0 | 1.024456  | 1.341173  | 1.940318  |
| 75  | 1  | 0 | 3.279477  | 0.324623  | 1.823419  |
| 76  | 46 | 0 | -0.237501 | 0.669703  | 0.074703  |
| 77  | 6  | 0 | 5.518376  | 1.421890  | 0.727283  |
| 78  | 6  | 0 | 6.431631  | 1.705982  | -0.295212 |
| 79  | 6  | 0 | 5.954669  | 0.642555  | 1.805249  |
| 80  | 6  | 0 | 7.734005  | 1.225058  | -0.245236 |
| 81  | 1  | 0 | 6.109829  | 2.285473  | -1.160467 |
| 82  | 6  | 0 | 7.253981  | 0.153054  | 1.853416  |
| 83  | 1  | 0 | 5.278152  | 0.440658  | 2.635006  |
| 84  | 6  | 0 | 8.148948  | 0.440692  | 0.827189  |
| 85  | 1  | 0 | 8.426819  | 1.458392  | -1.052020 |
| 86  | 1  | 0 | 7.573625  | -0.443162 | 2.706314  |
| 87  | 1  | 0 | 9.169333  | 0.064445  | 0.868545  |
| 88  | 6  | 0 | -1.032804 | 2.562783  | 0.416334  |
| 89  | 6  | 0 | 0.104611  | 3.517637  | 0.627532  |
| 90  | 6  | 0 | -0.749609 | 3.590828  | -0.637574 |
| 91  | 1  | 0 | -1.921797 | 2.668025  | 1.035763  |
| 92  | 1  | 0 | -0.031071 | 4.327192  | 1.349129  |
| 93  | 6  | 0 | -1.714639 | 4.793942  | -0.787316 |
| 94  | 6  | 0 | -2.885264 | 4.421200  | -1.700039 |
| 95  | 1  | 0 | -3.573774 | 5.271479  | -1.797202 |
| 96  | 1  | 0 | -2.564212 | 4.150846  | -2.715442 |
| 97  | 6  | 0 | -0.092789 | 3.141699  | -1.931561 |
| 98  | 1  | 0 | -0.839806 | 2.902534  | -2.700325 |
| 99  | 1  | 0 | 0.517996  | 2.235916  | -1.797620 |
| 100 | 1  | 0 | 0.569527  | 3.911716  | -2.348562 |
| 101 | 1  | 0 | -3.455252 | 3.577219  | -1.282593 |
| 102 | 6  | 0 | -0.948761 | 5.976148  | -1.389951 |
| 103 | 1  | 0 | -0.631986 | 5.787887  | -2.423873 |
| 104 | 1  | 0 | -1.583433 | 6.872870  | -1.405622 |
| 105 | 1  | 0 | -0.054140 | 6.214011  | -0.794548 |
| 106 | 6  | 0 | -2.320151 | 5.261978  | 0.540655  |
| 107 | 1  | 0 | -2.902830 | 4.477280  | 1.043699  |

|     |   |   |           |          |          |
|-----|---|---|-----------|----------|----------|
| 108 | 1 | 0 | -1.568382 | 5.642883 | 1.243832 |
| 109 | 1 | 0 | -3.010592 | 6.092314 | 0.342440 |

-----

Zero-point correction= 0.891654 (Hartree/Particle)  
Thermal correction to Energy= 0.944054  
Thermal correction to Enthalpy= 0.944998  
Thermal correction to Gibbs Free Energy= 0.806015  
Sum of electronic and zero-point Energies= -3018.594461  
Sum of electronic and thermal Energies= -3018.542061  
Sum of electronic and thermal Enthalpies= -3018.541117  
Sum of electronic and thermal Free Energies= -3018.680100  
M06/6-311++G(d,p)-SDD/SMD//m06/6-31G(d)-LANL2DZ energy in acetonitrile solvent = -3021.8142319

**INT5c'**

-----

| Center<br>Number | Atomic<br>Number | Atomic<br>Type | Coordinates (Angstroms) |           |           |
|------------------|------------------|----------------|-------------------------|-----------|-----------|
|                  |                  |                | X                       | Y         | Z         |
| 1                | 26               | 0              | -2.275137               | -2.848481 | 1.053765  |
| 2                | 15               | 0              | 0.301227                | -1.614148 | -0.659845 |
| 3                | 15               | 0              | -2.488087               | 0.555979  | 0.510977  |
| 4                | 6                | 0              | 2.883961                | -1.315803 | -1.659773 |
| 5                | 6                | 0              | -0.251919               | -2.156876 | -2.311414 |
| 6                | 6                | 0              | -1.530723               | -1.733651 | -4.321727 |
| 7                | 6                | 0              | 2.099922                | -1.938088 | -0.681280 |
| 8                | 6                | 0              | -1.114567               | -2.955370 | -4.841617 |
| 9                | 6                | 0              | 0.181460                | -3.372822 | -2.852262 |
| 10               | 6                | 0              | -1.097323               | -1.333149 | -3.060714 |
| 11               | 6                | 0              | -0.256210               | -3.772935 | -4.108887 |
| 12               | 6                | 0              | 2.716305                | -2.729150 | 0.292146  |
| 13               | 6                | 0              | 4.100253                | -2.885030 | 0.289698  |
| 14               | 6                | 0              | -3.192580               | -1.104516 | 0.666898  |
| 15               | 6                | 0              | -3.732300               | -1.691700 | 1.862800  |
| 16               | 6                | 0              | -2.755503               | 1.246434  | 2.179245  |
| 17               | 6                | 0              | -1.378443               | -4.630754 | 1.516263  |
| 18               | 6                | 0              | -3.409275               | -2.034142 | -0.406953 |
| 19               | 6                | 0              | -4.265042               | -2.964160 | 1.522091  |
| 20               | 6                | 0              | 4.263172                | -1.479134 | -1.661296 |
| 21               | 6                | 0              | -4.070915               | -3.171938 | 0.127754  |
| 22               | 6                | 0              | -1.720739               | 1.182671  | 3.116209  |
| 23               | 6                | 0              | -0.347883               | -2.824055 | 0.511382  |
| 24               | 6                | 0              | -4.002988               | 1.747414  | 2.561335  |
| 25               | 6                | 0              | -1.109749               | -3.666483 | 2.527755  |
| 26               | 6                | 0              | -0.903905               | -4.123476 | 0.275486  |
| 27               | 6                | 0              | -0.474935               | -2.552107 | 1.916659  |
| 28               | 6                | 0              | -3.682619               | 1.374909  | -0.602023 |
| 29               | 6                | 0              | -5.009399               | 0.928889  | -0.675271 |
| 30               | 6                | 0              | -4.210519               | 2.168768  | 3.870515  |
| 31               | 6                | 0              | -1.932878               | 1.599624  | 4.425083  |
| 32               | 6                | 0              | -3.179454               | 2.091434  | 4.802665  |
| 33               | 6                | 0              | 4.874762                | -2.256257 | -0.679290 |
| 34               | 6                | 0              | -4.198503               | 3.120369  | -2.195025 |
| 35               | 6                | 0              | -3.286961               | 2.472441  | -1.369830 |
| 36               | 6                | 0              | -5.515639               | 2.677228  | -2.259184 |
| 37               | 6                | 0              | -5.919071               | 1.582924  | -1.498427 |
| 38               | 1                | 0              | -0.176496               | -1.629498 | 2.408934  |
| 39               | 1                | 0              | -1.395572               | -3.741392 | 3.571435  |
| 40               | 1                | 0              | -1.909150               | -5.566736 | 1.655573  |
| 41               | 1                | 0              | -1.015310               | -4.598922 | -0.694292 |
| 42               | 1                | 0              | -3.091726               | -1.905065 | -1.438828 |
| 43               | 1                | 0              | -4.325218               | -4.071156 | -0.423503 |
| 44               | 1                | 0              | -4.693125               | -3.676928 | 2.219042  |
| 45               | 1                | 0              | -3.697438               | -1.251578 | 2.855052  |
| 46               | 1                | 0              | -1.416732               | -0.369865 | -2.652512 |
| 47               | 1                | 0              | -2.187369               | -1.087754 | -4.901385 |
| 48               | 1                | 0              | -1.451204               | -3.269130 | -5.827849 |
| 49               | 1                | 0              | 0.081229                | -4.720822 | -4.523722 |

|     |    |   |           |           |           |
|-----|----|---|-----------|-----------|-----------|
| 50  | 1  | 0 | 0.874803  | -3.999640 | -2.289395 |
| 51  | 1  | 0 | 2.117068  | -3.228400 | 1.053532  |
| 52  | 1  | 0 | 4.576952  | -3.498423 | 1.052812  |
| 53  | 1  | 0 | 5.958540  | -2.360679 | -0.661887 |
| 54  | 1  | 0 | 4.867832  | -0.987632 | -2.421452 |
| 55  | 1  | 0 | 2.410289  | -0.705389 | -2.431029 |
| 56  | 1  | 0 | -4.814946 | 1.809608  | 1.836992  |
| 57  | 1  | 0 | -5.182157 | 2.561762  | 4.163046  |
| 58  | 1  | 0 | -3.345770 | 2.423309  | 5.825584  |
| 59  | 1  | 0 | -1.122037 | 1.548197  | 5.149007  |
| 60  | 1  | 0 | -0.739268 | 0.816994  | 2.810450  |
| 61  | 1  | 0 | -2.255562 | 2.812732  | -1.322338 |
| 62  | 1  | 0 | -3.875398 | 3.971751  | -2.792664 |
| 63  | 1  | 0 | -6.230164 | 3.181357  | -2.906858 |
| 64  | 1  | 0 | -6.947731 | 1.231582  | -1.549174 |
| 65  | 1  | 0 | -5.333375 | 0.068218  | -0.090083 |
| 66  | 6  | 0 | 4.575440  | 1.311825  | 1.069457  |
| 67  | 6  | 0 | 4.523562  | 2.681365  | 0.763582  |
| 68  | 6  | 0 | 3.315457  | 3.354888  | 0.685019  |
| 69  | 6  | 0 | 2.100187  | 2.688127  | 0.887986  |
| 70  | 6  | 0 | 2.161077  | 1.346866  | 1.279973  |
| 71  | 6  | 0 | 3.372409  | 0.664953  | 1.354748  |
| 72  | 1  | 0 | 5.454002  | 3.224069  | 0.599176  |
| 73  | 1  | 0 | 3.302655  | 4.418900  | 0.446474  |
| 74  | 1  | 0 | 1.240862  | 0.827859  | 1.576817  |
| 75  | 1  | 0 | 3.376987  | -0.395859 | 1.606465  |
| 76  | 46 | 0 | -0.261948 | 0.712354  | -0.130742 |
| 77  | 6  | 0 | 5.854602  | 0.576508  | 1.078629  |
| 78  | 6  | 0 | 6.835013  | 0.852433  | 0.118566  |
| 79  | 6  | 0 | 6.103352  | -0.432866 | 2.015617  |
| 80  | 6  | 0 | 8.024834  | 0.134621  | 0.089521  |
| 81  | 1  | 0 | 6.648423  | 1.619606  | -0.633144 |
| 82  | 6  | 0 | 7.294190  | -1.148789 | 1.990236  |
| 83  | 1  | 0 | 5.362191  | -0.641313 | 2.787345  |
| 84  | 6  | 0 | 8.258351  | -0.869860 | 1.024923  |
| 85  | 1  | 0 | 8.772774  | 0.357815  | -0.669320 |
| 86  | 1  | 0 | 7.475675  | -1.920996 | 2.736120  |
| 87  | 1  | 0 | 9.191983  | -1.428977 | 1.006472  |
| 88  | 6  | 0 | -0.456748 | 2.733031  | 0.262826  |
| 89  | 6  | 0 | 0.812348  | 3.406584  | 0.703905  |
| 90  | 6  | 0 | 0.181869  | 3.731456  | -0.669859 |
| 91  | 1  | 0 | -1.362435 | 3.086943  | 0.761921  |
| 92  | 1  | 0 | 0.683882  | 4.219374  | 1.427876  |
| 93  | 6  | 0 | -0.523194 | 5.079168  | -0.664418 |
| 94  | 6  | 0 | 0.838410  | 3.374573  | -2.027701 |
| 95  | 6  | 0 | -0.230815 | 3.338454  | -3.129942 |
| 96  | 1  | 0 | -0.959230 | 2.531053  | -2.965175 |
| 97  | 1  | 0 | -0.778042 | 4.284271  | -3.224213 |
| 98  | 1  | 0 | 0.250040  | 3.151557  | -4.100312 |
| 99  | 6  | 0 | 1.876314  | 4.438485  | -2.406363 |
| 100 | 1  | 0 | 2.366976  | 4.167871  | -3.351318 |
| 101 | 1  | 0 | 1.421037  | 5.426043  | -2.551480 |
| 102 | 1  | 0 | 2.657128  | 4.528989  | -1.640620 |
| 103 | 6  | 0 | 1.545961  | 2.018088  | -2.084315 |
| 104 | 1  | 0 | 1.897283  | 1.841870  | -3.112148 |
| 105 | 1  | 0 | 2.411665  | 1.926941  | -1.420923 |
| 106 | 1  | 0 | 0.845879  | 1.175309  | -1.879943 |
| 107 | 1  | 0 | 0.173739  | 5.902239  | -0.872753 |
| 108 | 1  | 0 | -1.336150 | 5.138850  | -1.400084 |
| 109 | 1  | 0 | -0.966718 | 5.277323  | 0.319165  |

---

Zero-point correction= 0.892129 (Hartree/Particle)  
Thermal correction to Energy= 0.944478  
Thermal correction to Enthalpy= 0.945422  
Thermal correction to Gibbs Free Energy= 0.805946  
Sum of electronic and zero-point Energies= -3018.589235  
Sum of electronic and thermal Energies= -3018.536887

Sum of electronic and thermal Enthalpies= -3018.535942  
 Sum of electronic and thermal Free Energies= -3018.675419  
 M06/6-311++G(d,p)-SDD/SMD//m06/6-31G(d)-LANL2DZ energy in acetonitrile solvent = -3021.8094869

**INT6c**

| Center Number | Atomic Number | Atomic Type | Coordinates (Angstroms) |           |           |
|---------------|---------------|-------------|-------------------------|-----------|-----------|
|               |               |             | X                       | Y         | Z         |
| 1             | 26            | 0           | 2.375850                | -3.061735 | -1.310663 |
| 2             | 15            | 0           | -0.506829               | -1.896341 | 0.100422  |
| 3             | 15            | 0           | 2.561256                | 0.118762  | -0.185560 |
| 4             | 6             | 0           | -3.308659               | -1.966672 | 0.435690  |
| 5             | 6             | 0           | -0.371382               | -2.938527 | 1.598896  |
| 6             | 6             | 0           | 0.583040                | -3.285718 | 3.794054  |
| 7             | 6             | 0           | -2.243519               | -2.158455 | -0.454342 |
| 8             | 6             | 0           | -0.038996               | -4.528287 | 3.870649  |
| 9             | 6             | 0           | -1.009825               | -4.179172 | 1.691833  |
| 10            | 6             | 0           | 0.410858                | -2.490171 | 2.665981  |
| 11            | 6             | 0           | -0.840560               | -4.972125 | 2.821955  |
| 12            | 6             | 0           | -2.524847               | -2.515519 | -1.777005 |
| 13            | 6             | 0           | -3.840763               | -2.686608 | -2.199780 |
| 14            | 6             | 0           | 3.312422                | -1.519545 | -0.430459 |
| 15            | 6             | 0           | 4.070815                | -1.978935 | -1.558866 |
| 16            | 6             | 0           | 3.302223                | 1.035116  | -1.598026 |
| 17            | 6             | 0           | 1.448726                | -4.563488 | -2.338126 |
| 18            | 6             | 0           | 3.195271                | -2.619111 | 0.483440  |
| 19            | 6             | 0           | 4.396600                | -3.347302 | -1.343492 |
| 20            | 6             | 0           | -4.620635               | -2.132854 | 0.008104  |
| 21            | 6             | 0           | 3.860134                | -3.739724 | -0.084231 |
| 22            | 6             | 0           | 2.547335                | 1.168732  | -2.768014 |
| 23            | 6             | 0           | 0.380808                | -2.884546 | -1.152396 |
| 24            | 6             | 0           | 4.595033                | 1.561436  | -1.558489 |
| 25            | 6             | 0           | 1.498614                | -3.377828 | -3.124518 |
| 26            | 6             | 0           | 0.756248                | -4.267592 | -1.130435 |
| 27            | 6             | 0           | 0.841306                | -2.345291 | -2.399668 |
| 28            | 6             | 0           | 3.451803                | 0.681955  | 1.318266  |
| 29            | 6             | 0           | 4.766390                | 0.271620  | 1.581973  |
| 30            | 6             | 0           | 5.130732                | 2.190901  | -2.678491 |
| 31            | 6             | 0           | 3.084886                | 1.791786  | -3.888370 |
| 32            | 6             | 0           | 4.380775                | 2.300517  | -3.845091 |
| 33            | 6             | 0           | -4.890450               | -2.499191 | -1.308004 |
| 34            | 6             | 0           | 3.462411                | 1.950001  | 3.378693  |
| 35            | 6             | 0           | 2.800516                | 1.513719  | 2.234548  |
| 36            | 6             | 0           | 4.773242                | 1.556156  | 3.621666  |
| 37            | 6             | 0           | 5.423918                | 0.712690  | 2.723583  |
| 38            | 1             | 0           | 0.743807                | -1.306099 | -2.702358 |
| 39            | 1             | 0           | 2.002856                | -3.264017 | -4.078573 |
| 40            | 1             | 0           | 1.914916                | -5.511928 | -2.585206 |
| 41            | 1             | 0           | 0.607135                | -4.947930 | -0.297712 |
| 42            | 1             | 0           | 2.645240                | -2.610079 | 1.420744  |
| 43            | 1             | 0           | 3.899004                | -4.735745 | 0.344297  |
| 44            | 1             | 0           | 4.918501                | -3.991735 | -2.043395 |
| 45            | 1             | 0           | 4.302565                | -1.394649 | -2.444576 |
| 46            | 1             | 0           | 0.863910                | -1.497968 | 2.616251  |
| 47            | 1             | 0           | 1.189358                | -2.924369 | 4.622724  |
| 48            | 1             | 0           | 0.088150                | -5.147126 | 4.757481  |
| 49            | 1             | 0           | -1.342719               | -5.936075 | 2.888056  |
| 50            | 1             | 0           | -1.652691               | -4.519611 | 0.878792  |
| 51            | 1             | 0           | -1.717041               | -2.675240 | -2.489484 |
| 52            | 1             | 0           | -4.040975               | -2.973219 | -3.231336 |
| 53            | 1             | 0           | -5.920721               | -2.626432 | -1.636251 |
| 54            | 1             | 0           | -5.440016               | -1.967941 | 0.706263  |
| 55            | 1             | 0           | -3.107854               | -1.673167 | 1.465142  |
| 56            | 1             | 0           | 5.184633                | 1.489382  | -0.645053 |
| 57            | 1             | 0           | 6.137922                | 2.601952  | -2.635617 |
| 58            | 1             | 0           | 4.801229                | 2.795271  | -4.718964 |

|     |    |   |           |           |           |
|-----|----|---|-----------|-----------|-----------|
| 59  | 1  | 0 | 2.485905  | 1.892953  | -4.791665 |
| 60  | 1  | 0 | 1.514747  | 0.814716  | -2.782201 |
| 61  | 1  | 0 | 1.766682  | 1.810746  | 2.047862  |
| 62  | 1  | 0 | 2.941619  | 2.597538  | 4.082433  |
| 63  | 1  | 0 | 5.288730  | 1.896652  | 4.518361  |
| 64  | 1  | 0 | 6.445771  | 0.390511  | 2.917522  |
| 65  | 1  | 0 | 5.276366  | -0.405339 | 0.895303  |
| 66  | 6  | 0 | -4.407866 | 1.770213  | -1.013097 |
| 67  | 6  | 0 | -4.110987 | 3.038383  | -0.506262 |
| 68  | 6  | 0 | -2.815620 | 3.539153  | -0.543215 |
| 69  | 6  | 0 | -1.764769 | 2.769531  | -1.041201 |
| 70  | 6  | 0 | -2.077194 | 1.526005  | -1.603939 |
| 71  | 6  | 0 | -3.373342 | 1.034381  | -1.599661 |
| 72  | 1  | 0 | -4.913576 | 3.645823  | -0.087064 |
| 73  | 1  | 0 | -2.611943 | 4.535286  | -0.152116 |
| 74  | 1  | 0 | -1.271935 | 0.921175  | -2.032923 |
| 75  | 1  | 0 | -3.577476 | 0.039310  | -1.998452 |
| 76  | 46 | 0 | 0.256300  | 0.440770  | 0.233255  |
| 77  | 6  | 0 | -5.764534 | 1.202561  | -0.900330 |
| 78  | 6  | 0 | -6.478483 | 1.316134  | 0.298365  |
| 79  | 6  | 0 | -6.354409 | 0.510285  | -1.963207 |
| 80  | 6  | 0 | -7.739831 | 0.747524  | 0.433009  |
| 81  | 1  | 0 | -6.014121 | 1.827595  | 1.141605  |
| 82  | 6  | 0 | -7.617534 | -0.054934 | -1.831529 |
| 83  | 1  | 0 | -5.813565 | 0.425550  | -2.906305 |
| 84  | 6  | 0 | -8.314239 | 0.057423  | -0.631242 |
| 85  | 1  | 0 | -8.273353 | 0.835938  | 1.378514  |
| 86  | 1  | 0 | -8.064658 | -0.582055 | -2.674051 |
| 87  | 1  | 0 | -9.302663 | -0.387692 | -0.526533 |
| 88  | 6  | 0 | 0.707838  | 2.468094  | -0.237442 |
| 89  | 6  | 0 | -0.342090 | 3.220506  | -1.025877 |
| 90  | 6  | 0 | 0.343072  | 3.866944  | 0.174862  |
| 91  | 1  | 0 | 1.667034  | 2.472135  | -0.750038 |
| 92  | 1  | 0 | -0.005753 | 3.560239  | -2.011151 |
| 93  | 6  | 0 | 1.418320  | 4.958971  | -0.108455 |
| 94  | 6  | 0 | 2.598784  | 4.769880  | 0.847210  |
| 95  | 1  | 0 | 3.329593  | 5.582820  | 0.722703  |
| 96  | 1  | 0 | 2.283436  | 4.768996  | 1.899766  |
| 97  | 6  | 0 | -0.447561 | 4.110487  | 1.437912  |
| 98  | 1  | 0 | 0.212422  | 4.092614  | 2.319056  |
| 99  | 1  | 0 | -1.198590 | 3.335659  | 1.594354  |
| 100 | 1  | 0 | -0.960841 | 5.080900  | 1.429166  |
| 101 | 1  | 0 | 3.119236  | 3.819755  | 0.653715  |
| 102 | 6  | 0 | 0.817983  | 6.353849  | 0.099808  |
| 103 | 1  | 0 | 0.601911  | 6.565979  | 1.154234  |
| 104 | 1  | 0 | 1.519007  | 7.124498  | -0.252014 |
| 105 | 1  | 0 | -0.117403 | 6.465190  | -0.470510 |
| 106 | 6  | 0 | 1.973745  | 4.942538  | -1.538250 |
| 107 | 1  | 0 | 2.371548  | 3.965490  | -1.847194 |
| 108 | 1  | 0 | 1.220725  | 5.257776  | -2.273570 |
| 109 | 1  | 0 | 2.804878  | 5.658975  | -1.604951 |
| 110 | 53 | 0 | -1.573466 | 0.745000  | 2.317086  |

-----  
Zero-point correction= 0.892420 (Hartree/Particle)  
Thermal correction to Energy= 0.946911  
Thermal correction to Enthalpy= 0.947855  
Thermal correction to Gibbs Free Energy= 0.804171  
Sum of electronic and zero-point Energies= -3030.164180  
Sum of electronic and thermal Energies= -3030.109689  
Sum of electronic and thermal Enthalpies= -3030.108744  
Sum of electronic and thermal Free Energies= -3030.252429  
M06/6-311++G(d,p)-SDD/SMD//m06/6-31G(d)-LANL2DZ energy in acetonitrile solvent = -3033.3944547

### TS3c

-----  
Center Atomic Atomic Coordinates (Angstroms)  
Number Number Type X Y Z



|    |    |   |           |           |           |
|----|----|---|-----------|-----------|-----------|
| 1  | 26 | 0 | 4.595738  | -1.046174 | -1.742117 |
| 2  | 15 | 0 | 1.956546  | -2.160194 | 0.077831  |
| 3  | 15 | 0 | 3.043259  | 1.436816  | -0.026471 |
| 4  | 6  | 0 | -0.552073 | -3.395378 | 0.356275  |
| 5  | 6  | 0 | 2.902687  | -3.265999 | 1.196143  |
| 6  | 6  | 0 | 4.294684  | -3.490299 | 3.161353  |
| 7  | 6  | 0 | 0.568860  | -3.257465 | -0.474585 |
| 8  | 6  | 0 | 4.430010  | -4.852422 | 2.913036  |
| 9  | 6  | 0 | 3.027381  | -4.639043 | 0.964354  |
| 10 | 6  | 0 | 3.526943  | -2.700679 | 2.311220  |
| 11 | 6  | 0 | 3.790900  | -5.428171 | 1.817548  |
| 12 | 6  | 0 | 0.583202  | -3.934018 | -1.702714 |
| 13 | 6  | 0 | -0.504409 | -4.710506 | -2.100568 |
| 14 | 6  | 0 | 4.561546  | 0.631485  | -0.632324 |
| 15 | 6  | 0 | 5.271050  | 0.859333  | -1.858132 |
| 16 | 6  | 0 | 2.658525  | 2.570893  | -1.423481 |
| 17 | 6  | 0 | 4.572276  | -2.603573 | -3.062686 |
| 18 | 6  | 0 | 5.250819  | -0.411517 | 0.068157  |
| 19 | 6  | 0 | 6.366274  | -0.048214 | -1.913877 |
| 20 | 6  | 0 | -1.631199 | -4.181477 | -0.039336 |
| 21 | 6  | 0 | 6.354279  | -0.830256 | -0.723868 |
| 22 | 6  | 0 | 1.534002  | 2.311456  | -2.212081 |
| 23 | 6  | 0 | 2.969726  | -2.184753 | -1.439509 |
| 24 | 6  | 0 | 3.438500  | 3.696376  | -1.709915 |
| 25 | 6  | 0 | 3.750387  | -1.538335 | -3.530047 |
| 26 | 6  | 0 | 4.091666  | -3.008806 | -1.785098 |
| 27 | 6  | 0 | 2.762295  | -1.279329 | -2.537690 |
| 28 | 6  | 0 | 3.745182  | 2.513201  | 1.286884  |
| 29 | 6  | 0 | 5.071993  | 2.961466  | 1.256204  |
| 30 | 6  | 0 | 3.114106  | 4.522180  | -2.780384 |
| 31 | 6  | 0 | 1.195368  | 3.148185  | -3.270555 |
| 32 | 6  | 0 | 1.992698  | 4.249219  | -3.561602 |
| 33 | 6  | 0 | -1.617166 | -4.832826 | -1.271403 |
| 34 | 6  | 0 | 3.420331  | 3.695003  | 3.372904  |
| 35 | 6  | 0 | 2.928788  | 2.874587  | 2.361869  |
| 36 | 6  | 0 | 4.734055  | 4.148170  | 3.327829  |
| 37 | 6  | 0 | 5.560954  | 3.777231  | 2.270249  |
| 38 | 1  | 0 | 2.042011  | -0.462686 | -2.560851 |
| 39 | 1  | 0 | 3.894053  | -0.975467 | -4.446859 |
| 40 | 1  | 0 | 5.451424  | -2.995355 | -3.564182 |
| 41 | 1  | 0 | 4.536943  | -3.759998 | -1.139708 |
| 42 | 1  | 0 | 4.944423  | -0.846210 | 1.015767  |
| 43 | 1  | 0 | 7.030805  | -1.645081 | -0.487452 |
| 44 | 1  | 0 | 7.057875  | -0.159363 | -2.742942 |
| 45 | 1  | 0 | 4.974156  | 1.558980  | -2.633734 |
| 46 | 1  | 0 | 3.373167  | -1.642668 | 2.530550  |
| 47 | 1  | 0 | 4.770043  | -3.040951 | 4.031430  |
| 48 | 1  | 0 | 5.024114  | -5.472199 | 3.582973  |
| 49 | 1  | 0 | 3.881261  | -6.497454 | 1.631892  |
| 50 | 1  | 0 | 2.520034  | -5.098677 | 0.114597  |
| 51 | 1  | 0 | 1.453343  | -3.861030 | -2.356163 |
| 52 | 1  | 0 | -0.470933 | -5.238877 | -3.053280 |
| 53 | 1  | 0 | -2.462311 | -5.449028 | -1.575554 |
| 54 | 1  | 0 | -2.485161 | -4.289324 | 0.628604  |
| 55 | 1  | 0 | -0.577395 | -2.874720 | 1.317893  |
| 56 | 1  | 0 | 4.300071  | 3.935554  | -1.086026 |
| 57 | 1  | 0 | 3.729044  | 5.394860  | -2.995370 |
| 58 | 1  | 0 | 1.726846  | 4.913745  | -4.382210 |
| 59 | 1  | 0 | 0.276642  | 2.957322  | -3.822382 |
| 60 | 1  | 0 | 0.857835  | 1.495643  | -1.952447 |
| 61 | 1  | 0 | 1.905719  | 2.497300  | 2.405642  |
| 62 | 1  | 0 | 2.769160  | 3.970517  | 4.201744  |
| 63 | 1  | 0 | 5.119952  | 4.784498  | 4.122808  |
| 64 | 1  | 0 | 6.594426  | 4.119183  | 2.237948  |
| 65 | 1  | 0 | 5.731432  | 2.661837  | 0.440350  |
| 66 | 6  | 0 | -4.799795 | -0.673789 | 1.385552  |

|     |    |   |           |           |           |
|-----|----|---|-----------|-----------|-----------|
| 67  | 6  | 0 | -4.763401 | 0.644013  | 1.874303  |
| 68  | 6  | 0 | -3.643187 | 1.442886  | 1.727550  |
| 69  | 6  | 0 | -2.469491 | 0.964034  | 1.111505  |
| 70  | 6  | 0 | -2.483658 | -0.384918 | 0.705588  |
| 71  | 6  | 0 | -3.619213 | -1.170909 | 0.810673  |
| 72  | 1  | 0 | -5.659048 | 1.068851  | 2.333930  |
| 73  | 1  | 0 | -3.674626 | 2.481709  | 2.052961  |
| 74  | 1  | 0 | -1.551628 | -0.816910 | 0.334545  |
| 75  | 1  | 0 | -3.580532 | -2.212866 | 0.483506  |
| 76  | 46 | 0 | 1.236975  | 0.116686  | 0.867178  |
| 77  | 6  | 0 | -6.044036 | -1.459885 | 1.412722  |
| 78  | 6  | 0 | -6.976263 | -1.319827 | 2.452646  |
| 79  | 6  | 0 | -6.366479 | -2.340548 | 0.366454  |
| 80  | 6  | 0 | -8.173693 | -2.023587 | 2.444568  |
| 81  | 1  | 0 | -6.736710 | -0.672832 | 3.296067  |
| 82  | 6  | 0 | -7.561736 | -3.051325 | 0.361869  |
| 83  | 1  | 0 | -5.664985 | -2.460904 | -0.462016 |
| 84  | 6  | 0 | -8.476235 | -2.892720 | 1.399348  |
| 85  | 1  | 0 | -8.873223 | -1.902369 | 3.270618  |
| 86  | 1  | 0 | -7.783180 | -3.729248 | -0.461993 |
| 87  | 1  | 0 | -9.412691 | -3.447691 | 1.397598  |
| 88  | 6  | 0 | 0.064312  | 1.887425  | 0.818173  |
| 89  | 6  | 0 | -1.396855 | 1.864794  | 0.756557  |
| 90  | 6  | 0 | -0.721420 | 2.880759  | 1.653251  |
| 91  | 1  | 0 | 0.522713  | 2.336300  | -0.061429 |
| 92  | 1  | 0 | -1.564346 | 2.065621  | -0.514189 |
| 93  | 6  | 0 | -0.797919 | 4.371978  | 1.231133  |
| 94  | 6  | 0 | 0.009096  | 5.258458  | 2.182997  |
| 95  | 1  | 0 | -0.028398 | 6.304169  | 1.843528  |
| 96  | 1  | 0 | -0.373674 | 5.234616  | 3.212319  |
| 97  | 6  | 0 | -0.826363 | 2.641016  | 3.145279  |
| 98  | 1  | 0 | 0.096890  | 2.920327  | 3.676804  |
| 99  | 1  | 0 | -1.017810 | 1.586164  | 3.365407  |
| 100 | 1  | 0 | -1.642649 | 3.229979  | 3.589552  |
| 101 | 1  | 0 | 1.068128  | 4.957793  | 2.205011  |
| 102 | 6  | 0 | -2.270952 | 4.798136  | 1.248384  |
| 103 | 1  | 0 | -2.736180 | 4.641411  | 2.234310  |
| 104 | 1  | 0 | -2.358597 | 5.871327  | 1.017767  |
| 105 | 1  | 0 | -2.835295 | 4.238351  | 0.485926  |
| 106 | 6  | 0 | -0.279893 | 4.625573  | -0.185699 |
| 107 | 1  | 0 | 0.806049  | 4.456604  | -0.264446 |
| 108 | 1  | 0 | -0.794351 | 4.005022  | -0.932957 |
| 109 | 1  | 0 | -0.459993 | 5.678210  | -0.450952 |
| 110 | 53 | 0 | 0.292380  | -0.961277 | 3.249167  |
| 111 | 6  | 0 | -2.934065 | 1.917033  | -2.073908 |
| 112 | 8  | 0 | -3.432492 | 1.047768  | -2.877746 |
| 113 | 8  | 0 | -3.613325 | 2.786706  | -1.462297 |
| 114 | 8  | 0 | -1.622509 | 1.834163  | -1.820526 |
| 115 | 55 | 0 | -5.983465 | 1.174367  | -1.324882 |
| 116 | 55 | 0 | -1.272024 | -0.948869 | -2.678398 |

-----  
Zero-point correction= 0.903834 (Hartree/Particle)  
Thermal correction to Energy= 0.967241  
Thermal correction to Enthalpy= 0.968185  
Thermal correction to Gibbs Free Energy= 0.800431  
Sum of electronic and zero-point Energies= -3333.609440  
Sum of electronic and thermal Energies= -3333.546033  
Sum of electronic and thermal Enthalpies= -3333.545089  
Sum of electronic and thermal Free Energies= -3333.712843  
M06/6-311++G(d,p)-SDD/SMD//m06/6-31G(d)-LANL2DZ energy in acetonitrile solvent = -3337.5601546

### TS3c'

-----

| Center<br>Number | Atomic<br>Number | Atomic<br>Type | Coordinates (Angstroms) |          |          |
|------------------|------------------|----------------|-------------------------|----------|----------|
|                  |                  |                | X                       | Y        | Z        |
| 1                | 26               | 0              | 4.243615                | 1.263684 | 2.509773 |

-----

|    |    |   |           |           |           |
|----|----|---|-----------|-----------|-----------|
| 2  | 15 | 0 | 2.509429  | 1.848517  | -0.345131 |
| 3  | 15 | 0 | 3.114154  | -1.667445 | 1.055177  |
| 4  | 6  | 0 | 0.429522  | 2.846118  | -1.904842 |
| 5  | 6  | 0 | 3.868208  | 2.540068  | -1.366531 |
| 6  | 6  | 0 | 5.800176  | 2.130964  | -2.762013 |
| 7  | 6  | 0 | 1.121134  | 3.014173  | -0.695754 |
| 8  | 6  | 0 | 6.013440  | 3.500774  | -2.872608 |
| 9  | 6  | 0 | 4.078919  | 3.916555  | -1.496733 |
| 10 | 6  | 0 | 4.727475  | 1.650616  | -2.015897 |
| 11 | 6  | 0 | 5.149157  | 4.395247  | -2.243832 |
| 12 | 6  | 0 | 0.685369  | 3.992601  | 0.203044  |
| 13 | 6  | 0 | -0.423638 | 4.784713  | -0.091133 |
| 14 | 6  | 0 | 4.346524  | -0.711151 | 2.001356  |
| 15 | 6  | 0 | 4.525591  | -0.546376 | 3.411117  |
| 16 | 6  | 0 | 2.174566  | -2.546103 | 2.358447  |
| 17 | 6  | 0 | 4.148432  | 3.181457  | 3.180567  |
| 18 | 6  | 0 | 5.376865  | 0.043503  | 1.351640  |
| 19 | 6  | 0 | 5.649929  | 0.301913  | 3.623045  |
| 20 | 6  | 0 | -0.665362 | 3.649969  | -2.203101 |
| 21 | 6  | 0 | 6.179659  | 0.660076  | 2.350307  |
| 22 | 6  | 0 | 1.417551  | -1.792056 | 3.266469  |
| 23 | 6  | 0 | 3.008630  | 2.370977  | 1.331725  |
| 24 | 6  | 0 | 2.031170  | -3.936908 | 2.362735  |
| 25 | 6  | 0 | 3.027027  | 2.439891  | 3.651267  |
| 26 | 6  | 0 | 4.136512  | 3.146391  | 1.756878  |
| 27 | 6  | 0 | 2.328804  | 1.937209  | 2.518649  |
| 28 | 6  | 0 | 4.190477  | -2.971295 | 0.339497  |
| 29 | 6  | 0 | 5.179799  | -3.620939 | 1.088264  |
| 30 | 6  | 0 | 1.170140  | -4.557353 | 3.264344  |
| 31 | 6  | 0 | 0.571195  | -2.412489 | 4.177385  |
| 32 | 6  | 0 | 0.441414  | -3.799143 | 4.175829  |
| 33 | 6  | 0 | -1.101441 | 4.617491  | -1.294773 |
| 34 | 6  | 0 | 4.817322  | -4.280925 | -1.594169 |
| 35 | 6  | 0 | 4.017150  | -3.303407 | -1.005625 |
| 36 | 6  | 0 | 5.792718  | -4.926483 | -0.843343 |
| 37 | 6  | 0 | 5.975015  | -4.595464 | 0.499467  |
| 38 | 1  | 0 | 1.437316  | 1.314848  | 2.537051  |
| 39 | 1  | 0 | 2.782409  | 2.241000  | 4.689943  |
| 40 | 1  | 0 | 4.914130  | 3.640221  | 3.798471  |
| 41 | 1  | 0 | 4.890840  | 3.567776  | 1.099276  |
| 42 | 1  | 0 | 5.493912  | 0.153116  | 0.276157  |
| 43 | 1  | 0 | 7.006173  | 1.339856  | 2.169867  |
| 44 | 1  | 0 | 6.004484  | 0.659834  | 4.584767  |
| 45 | 1  | 0 | 3.882610  | -0.962769 | 4.180597  |
| 46 | 1  | 0 | 4.525235  | 0.578842  | -1.963944 |
| 47 | 1  | 0 | 6.458503  | 1.430250  | -3.272459 |
| 48 | 1  | 0 | 6.848871  | 3.875811  | -3.462235 |
| 49 | 1  | 0 | 5.306868  | 5.468555  | -2.341668 |
| 50 | 1  | 0 | 3.398203  | 4.617109  | -1.009559 |
| 51 | 1  | 0 | 1.214107  | 4.136286  | 1.146127  |
| 52 | 1  | 0 | -0.755274 | 5.539908  | 0.621288  |
| 53 | 1  | 0 | -1.953795 | 5.254566  | -1.534110 |
| 54 | 1  | 0 | -1.168877 | 3.530998  | -3.164769 |
| 55 | 1  | 0 | 0.756797  | 2.074755  | -2.609402 |
| 56 | 1  | 0 | 2.598656  | -4.541301 | 1.655031  |
| 57 | 1  | 0 | 1.071556  | -5.641924 | 3.253883  |
| 58 | 1  | 0 | -0.231050 | -4.286568 | 4.879997  |
| 59 | 1  | 0 | -0.006653 | -1.807923 | 4.874966  |
| 60 | 1  | 0 | 1.491559  | -0.703369 | 3.256532  |
| 61 | 1  | 0 | 3.263387  | -2.773557 | -1.594958 |
| 62 | 1  | 0 | 4.677741  | -4.526031 | -2.645818 |
| 63 | 1  | 0 | 6.421146  | -5.687492 | -1.304153 |
| 64 | 1  | 0 | 6.743937  | -5.097145 | 1.085539  |
| 65 | 1  | 0 | 5.323345  | -3.358788 | 2.138148  |
| 66 | 6  | 0 | -3.139399 | 1.429981  | 1.696416  |
| 67 | 6  | 0 | -3.588281 | 0.101766  | 1.701714  |
| 68 | 6  | 0 | -2.732963 | -0.953578 | 1.434584  |

|     |    |   |           |           |           |
|-----|----|---|-----------|-----------|-----------|
| 69  | 6  | 0 | -1.387228 | -0.722732 | 1.105081  |
| 70  | 6  | 0 | -0.929130 | 0.607156  | 1.124225  |
| 71  | 6  | 0 | -1.783656 | 1.659749  | 1.410428  |
| 72  | 1  | 0 | -4.646093 | -0.115161 | 1.834242  |
| 73  | 1  | 0 | -3.161354 | -1.950337 | 1.328154  |
| 74  | 1  | 0 | 0.115037  | 0.795152  | 0.861940  |
| 75  | 1  | 0 | -1.394806 | 2.678702  | 1.353043  |
| 76  | 46 | 0 | 1.810032  | -0.507144 | -0.568691 |
| 77  | 6  | 0 | -4.087323 | 2.547561  | 1.869240  |
| 78  | 6  | 0 | -5.419810 | 2.409670  | 1.440085  |
| 79  | 6  | 0 | -3.681541 | 3.780562  | 2.397907  |
| 80  | 6  | 0 | -6.306004 | 3.476966  | 1.545936  |
| 81  | 1  | 0 | -5.734631 | 1.470469  | 0.967835  |
| 82  | 6  | 0 | -4.573635 | 4.841442  | 2.503632  |
| 83  | 1  | 0 | -2.658225 | 3.899509  | 2.754663  |
| 84  | 6  | 0 | -5.891076 | 4.695777  | 2.078245  |
| 85  | 1  | 0 | -7.332172 | 3.357530  | 1.197872  |
| 86  | 1  | 0 | -4.238050 | 5.787063  | 2.927772  |
| 87  | 1  | 0 | -6.590218 | 5.526559  | 2.161680  |
| 88  | 6  | 0 | 0.285118  | -2.068453 | -0.412819 |
| 89  | 6  | 0 | -0.561334 | -1.850373 | 0.725779  |
| 90  | 6  | 0 | -0.649467 | -1.942366 | -1.493336 |
| 91  | 1  | 0 | 0.764245  | -3.049913 | -0.362463 |
| 92  | 1  | 0 | -0.709873 | -2.738059 | 1.350018  |
| 93  | 6  | 0 | -1.081035 | -3.192071 | -2.249390 |
| 94  | 6  | 0 | 0.105162  | -4.096138 | -2.600920 |
| 95  | 1  | 0 | -0.265316 | -4.949376 | -3.185255 |
| 96  | 1  | 0 | 0.848159  | -3.555860 | -3.205082 |
| 97  | 6  | 0 | -1.363614 | -0.697138 | -1.815504 |
| 98  | 1  | 0 | -1.205926 | -0.500095 | -2.886297 |
| 99  | 1  | 0 | -0.975640 | 0.164215  | -1.267533 |
| 100 | 1  | 0 | -2.463421 | -0.851160 | -1.685476 |
| 101 | 1  | 0 | 0.609987  | -4.509728 | -1.717065 |
| 102 | 6  | 0 | -1.850556 | -2.857793 | -3.532774 |
| 103 | 1  | 0 | -1.232773 | -2.280295 | -4.235572 |
| 104 | 1  | 0 | -2.121840 | -3.800409 | -4.027947 |
| 105 | 1  | 0 | -2.781895 | -2.317334 | -3.309833 |
| 106 | 6  | 0 | -2.060025 | -3.938511 | -1.314452 |
| 107 | 1  | 0 | -1.554843 | -4.273622 | -0.397185 |
| 108 | 1  | 0 | -2.939786 | -3.325001 | -1.046791 |
| 109 | 1  | 0 | -2.419778 | -4.832784 | -1.845567 |
| 110 | 53 | 0 | 1.943602  | -0.611107 | -3.480273 |
| 111 | 6  | 0 | -5.001520 | -1.211613 | -0.864691 |
| 112 | 8  | 0 | -5.809652 | -0.269332 | -0.437461 |
| 113 | 8  | 0 | -4.339171 | -1.024457 | -1.951828 |
| 114 | 8  | 0 | -4.875263 | -2.296019 | -0.182464 |
| 115 | 55 | 0 | -3.914706 | 1.816073  | -1.655297 |
| 116 | 55 | 0 | -7.503969 | -2.191453 | 0.905250  |

-----  
Zero-point correction= 0.907942 (Hartree/Particle)  
Thermal correction to Energy= 0.971220  
Thermal correction to Enthalpy= 0.972165  
Thermal correction to Gibbs Free Energy= 0.804697  
Sum of electronic and zero-point Energies= -3333.596025  
Sum of electronic and thermal Energies= -3333.532746  
Sum of electronic and thermal Enthalpies= -3333.531802  
Sum of electronic and thermal Free Energies= -3333.699270  
M06/6-311++G(d,p)-SDD/SMD//m06/6-31G(d)-LANL2DZ energy in acetonitrile solvent = -3337.5604321

### INT7c

| Center Number | Atomic Number | Atomic Type | Coordinates (Angstroms) |           |           |
|---------------|---------------|-------------|-------------------------|-----------|-----------|
|               |               |             | X                       | Y         | Z         |
| 1             | 26            | 0           | -3.207532               | -1.751880 | -1.187219 |
| 2             | 15            | 0           | -1.925252               | 1.121641  | 0.134929  |
| 3             | 15            | 0           | -0.113940               | -2.190789 | 0.141084  |

|    |   |   |           |           |           |
|----|---|---|-----------|-----------|-----------|
| 4  | 6 | 0 | -1.471089 | 3.851235  | 0.381902  |
| 5  | 6 | 0 | -2.997214 | 1.133403  | 1.624398  |
| 6  | 6 | 0 | -3.352907 | 0.401974  | 3.905841  |
| 7  | 6 | 0 | -2.049986 | 2.864793  | -0.425484 |
| 8  | 6 | 0 | -4.562248 | 1.088933  | 3.939102  |
| 9  | 6 | 0 | -4.204459 | 1.837924  | 1.674617  |
| 10 | 6 | 0 | -2.571179 | 0.431284  | 2.754243  |
| 11 | 6 | 0 | -4.984648 | 1.811571  | 2.825020  |
| 12 | 6 | 0 | -2.623103 | 3.233917  | -1.644662 |
| 13 | 6 | 0 | -2.609481 | 4.565891  | -2.053005 |
| 14 | 6 | 0 | -1.791270 | -2.824841 | -0.210206 |
| 15 | 6 | 0 | -2.325374 | -3.588592 | -1.297198 |
| 16 | 6 | 0 | 0.963255  | -3.001511 | -1.100111 |
| 17 | 6 | 0 | -4.572266 | -0.792505 | -2.354017 |
| 18 | 6 | 0 | -2.887164 | -2.509565 | 0.660499  |
| 19 | 6 | 0 | -3.729551 | -3.722740 | -1.102916 |
| 20 | 6 | 0 | -1.463479 | 5.179501  | -0.025553 |
| 21 | 6 | 0 | -4.074822 | -3.061656 | 0.109133  |
| 22 | 6 | 0 | 0.645187  | -2.966705 | -2.464295 |
| 23 | 6 | 0 | -2.919898 | 0.250726  | -1.113677 |
| 24 | 6 | 0 | 2.206110  | -3.513676 | -0.712755 |
| 25 | 6 | 0 | -3.340183 | -0.934928 | -3.056471 |
| 26 | 6 | 0 | -4.318771 | -0.058117 | -1.159890 |
| 27 | 6 | 0 | -2.323236 | -0.293639 | -2.297591 |
| 28 | 6 | 0 | 0.252316  | -3.120797 | 1.681996  |
| 29 | 6 | 0 | 0.094413  | -4.509025 | 1.764314  |
| 30 | 6 | 0 | 3.093129  | -4.010034 | -1.662957 |
| 31 | 6 | 0 | 1.526858  | -3.479834 | -3.409032 |
| 32 | 6 | 0 | 2.753863  | -4.004618 | -3.011820 |
| 33 | 6 | 0 | -2.028711 | 5.539325  | -1.247271 |
| 34 | 6 | 0 | 0.937611  | -3.080053 | 4.002892  |
| 35 | 6 | 0 | 0.670844  | -2.414281 | 2.808581  |
| 36 | 6 | 0 | 0.780483  | -4.458887 | 4.075128  |
| 37 | 6 | 0 | 0.358363  | -5.173756 | 2.954295  |
| 38 | 1 | 0 | -1.262862 | -0.237827 | -2.538423 |
| 39 | 1 | 0 | -3.192842 | -1.485580 | -3.980362 |
| 40 | 1 | 0 | -5.525329 | -1.222948 | -2.645330 |
| 41 | 1 | 0 | -5.039286 | 0.163083  | -0.377535 |
| 42 | 1 | 0 | -2.824199 | -1.906379 | 1.562487  |
| 43 | 1 | 0 | -5.075264 | -2.943919 | 0.512746  |
| 44 | 1 | 0 | -4.421175 | -4.200433 | -1.789634 |
| 45 | 1 | 0 | -1.766468 | -3.965721 | -2.146878 |
| 46 | 1 | 0 | -1.611001 | -0.089531 | 2.719716  |
| 47 | 1 | 0 | -3.012874 | -0.151139 | 4.779955  |
| 48 | 1 | 0 | -5.173578 | 1.073203  | 4.840134  |
| 49 | 1 | 0 | -5.922745 | 2.363832  | 2.856823  |
| 50 | 1 | 0 | -4.522652 | 2.424307  | 0.811049  |
| 51 | 1 | 0 | -3.077132 | 2.478153  | -2.285866 |
| 52 | 1 | 0 | -3.057412 | 4.841591  | -3.007135 |
| 53 | 1 | 0 | -2.016014 | 6.579388  | -1.569762 |
| 54 | 1 | 0 | -1.000604 | 5.931248  | 0.612445  |
| 55 | 1 | 0 | -1.004843 | 3.575152  | 1.330383  |
| 56 | 1 | 0 | 2.492220  | -3.518167 | 0.339979  |
| 57 | 1 | 0 | 4.056636  | -4.401798 | -1.339330 |
| 58 | 1 | 0 | 3.446105  | -4.400785 | -3.753035 |
| 59 | 1 | 0 | 1.256191  | -3.461308 | -4.464422 |
| 60 | 1 | 0 | -0.293502 | -2.520898 | -2.796804 |
| 61 | 1 | 0 | 0.792797  | -1.331563 | 2.732625  |
| 62 | 1 | 0 | 1.271144  | -2.518334 | 4.874696  |
| 63 | 1 | 0 | 0.987752  | -4.983111 | 5.006956  |
| 64 | 1 | 0 | 0.235092  | -6.254168 | 3.012047  |
| 65 | 1 | 0 | -0.231644 | -5.069426 | 0.886653  |
| 66 | 6 | 0 | 1.315826  | 4.950684  | 3.263673  |
| 67 | 6 | 0 | 1.109793  | 3.638307  | 3.687926  |
| 68 | 6 | 0 | 1.280552  | 2.583043  | 2.802954  |
| 69 | 6 | 0 | 1.660849  | 2.814859  | 1.472062  |
| 70 | 6 | 0 | 1.856512  | 4.136630  | 1.056256  |

|     |    |   |           |           |           |
|-----|----|---|-----------|-----------|-----------|
| 71  | 6  | 0 | 1.694102  | 5.191911  | 1.946095  |
| 72  | 1  | 0 | 0.810714  | 3.437421  | 4.715850  |
| 73  | 1  | 0 | 1.090821  | 1.557086  | 3.125170  |
| 74  | 1  | 0 | 2.135674  | 4.332151  | 0.021046  |
| 75  | 1  | 0 | 1.858815  | 6.213124  | 1.603620  |
| 76  | 46 | 0 | 0.266653  | 0.161549  | 0.299289  |
| 77  | 6  | 0 | 1.783387  | 1.709280  | 0.537423  |
| 78  | 6  | 0 | 2.399299  | 0.489217  | 0.349316  |
| 79  | 6  | 0 | 2.482711  | 1.500506  | -0.785654 |
| 80  | 1  | 0 | 1.181621  | 5.778122  | 3.958375  |
| 81  | 6  | 0 | 3.845778  | 2.122091  | -0.892784 |
| 82  | 8  | 0 | 4.531004  | 2.453092  | 0.047671  |
| 83  | 8  | 0 | 4.253079  | 2.236503  | -2.172040 |
| 84  | 6  | 0 | 5.564126  | 2.759650  | -2.330665 |
| 85  | 1  | 0 | 5.743944  | 2.801250  | -3.407199 |
| 86  | 1  | 0 | 5.642492  | 3.760076  | -1.890419 |
| 87  | 1  | 0 | 6.300197  | 2.109709  | -1.843452 |
| 88  | 6  | 0 | 1.701796  | 1.351852  | -2.059305 |
| 89  | 6  | 0 | 1.846199  | 0.226183  | -2.873259 |
| 90  | 6  | 0 | 0.830625  | 2.366033  | -2.465808 |
| 91  | 6  | 0 | 1.147751  | 0.122995  | -4.072126 |
| 92  | 1  | 0 | 2.507385  | -0.583016 | -2.554851 |
| 93  | 6  | 0 | 0.126626  | 2.263661  | -3.661332 |
| 94  | 1  | 0 | 0.693308  | 3.239033  | -1.824610 |
| 95  | 6  | 0 | 0.288293  | 1.143715  | -4.472835 |
| 96  | 1  | 0 | 1.278704  | -0.760220 | -4.697115 |
| 97  | 1  | 0 | -0.554455 | 3.062686  | -3.953411 |
| 98  | 1  | 0 | -0.257178 | 1.064300  | -5.412517 |
| 99  | 6  | 0 | 3.402127  | -0.401006 | 0.912873  |
| 100 | 6  | 0 | 3.485599  | -0.625240 | 2.293808  |
| 101 | 6  | 0 | 4.299612  | -1.071158 | 0.071903  |
| 102 | 6  | 0 | 4.418751  | -1.511620 | 2.812278  |
| 103 | 1  | 0 | 2.815034  | -0.080442 | 2.959493  |
| 104 | 6  | 0 | 5.245033  | -1.945658 | 0.594184  |
| 105 | 1  | 0 | 4.246654  | -0.895835 | -1.004167 |
| 106 | 6  | 0 | 5.300885  | -2.180408 | 1.964857  |
| 107 | 1  | 0 | 4.466600  | -1.675754 | 3.888291  |
| 108 | 1  | 0 | 5.938764  | -2.451943 | -0.076601 |
| 109 | 1  | 0 | 6.033685  | -2.874043 | 2.374113  |

-----

Zero-point correction= 0.877350 (Hartree/Particle)  
Thermal correction to Energy= 0.930258  
Thermal correction to Enthalpy= 0.931202  
Thermal correction to Gibbs Free Energy= 0.789957  
Sum of electronic and zero-point Energies= -3018.179805  
Sum of electronic and thermal Energies= -3018.126897  
Sum of electronic and thermal Enthalpies= -3018.125953  
Sum of electronic and thermal Free Energies= -3018.267197  
M06/6-311++G(d,p)-SDD/SMD//m06/6-31G(d)-LANL2DZ energy in acetonitrile solvent = -3021.3485601

### Cs<sub>2</sub>CO<sub>3</sub>

-----

| Center<br>Number | Atomic<br>Number | Atomic<br>Type | Coordinates (Angstroms) |           |           |
|------------------|------------------|----------------|-------------------------|-----------|-----------|
|                  |                  |                | X                       | Y         | Z         |
| 1                | 6                | 0              | 0.000000                | -1.217357 | -0.000795 |
| 2                | 8                | 0              | -0.000001               | 0.112214  | -0.001171 |
| 3                | 8                | 0              | -1.118309               | -1.842261 | -0.000076 |
| 4                | 8                | 0              | 1.118313                | -1.842257 | -0.000138 |
| 5                | 55               | 0              | -2.854397               | 0.326205  | 0.000137  |
| 6                | 55               | 0              | 2.854397                | 0.326205  | 0.000151  |

-----

Zero-point correction= 0.016375 (Hartree/Particle)  
Thermal correction to Energy= 0.023451  
Thermal correction to Enthalpy= 0.024395  
Thermal correction to Gibbs Free Energy= -0.020998  
Sum of electronic and zero-point Energies= -303.402709

Sum of electronic and thermal Energies= -303.395632  
 Sum of electronic and thermal Enthalpies= -303.394688  
 Sum of electronic and thermal Free Energies= -303.440081  
 M06/6-311++G(d,p)-SDD/SMD//m06/6-31G(d)-LANL2DZ energy in acetonitrile solvent = -304.1833035

### Cs<sub>2</sub>HCO<sub>3</sub><sup>+</sup>

| Center Number | Atomic Number | Atomic Type | Coordinates (Angstroms) |           |           |
|---------------|---------------|-------------|-------------------------|-----------|-----------|
|               |               |             | X                       | Y         | Z         |
| 1             | 6             | 0           | 0.094749                | 1.182734  | 0.000056  |
| 2             | 8             | 0           | -0.061932               | -0.060551 | 0.000151  |
| 3             | 8             | 0           | -1.107151               | 1.905966  | -0.000230 |
| 4             | 8             | 0           | 1.133017                | 1.857826  | 0.000243  |
| 5             | 1             | 0           | -0.830445               | 2.835529  | -0.000319 |
| 6             | 55            | 0           | -3.031319               | -0.365283 | 0.000001  |
| 7             | 55            | 0           | 3.041328                | -0.353951 | -0.000025 |

Zero-point correction= 0.028937 (Hartree/Particle)  
 Thermal correction to Energy= 0.036653  
 Thermal correction to Enthalpy= 0.037597  
 Thermal correction to Gibbs Free Energy= -0.009146  
 Sum of electronic and zero-point Energies= -303.901216  
 Sum of electronic and thermal Energies= -303.893499  
 Sum of electronic and thermal Enthalpies= -303.892555  
 Sum of electronic and thermal Free Energies= -303.939299  
 M06/6-311++G(d,p)-SDD/SMD//m06/6-31G(d)-LANL2DZ energy in acetonitrile solvent = -304.6942572

### F

| Center Number | Atomic Number | Atomic Type | Coordinates (Angstroms) |          |          |
|---------------|---------------|-------------|-------------------------|----------|----------|
|               |               |             | X                       | Y        | Z        |
| 1             | 53            | 0           | 0.000000                | 0.000000 | 0.000000 |

Zero-point correction= 0.000000 (Hartree/Particle)  
 Thermal correction to Energy= 0.001416  
 Thermal correction to Enthalpy= 0.002360  
 Thermal correction to Gibbs Free Energy= -0.016848  
 Sum of electronic and zero-point Energies= -11.435014  
 Sum of electronic and thermal Energies= -11.433598  
 Sum of electronic and thermal Enthalpies= -11.432654  
 Sum of electronic and thermal Free Energies= -11.451862  
 M06/6-311++G(d,p)-SDD/SMD//m06/6-31G(d)-LANL2DZ energy in acetonitrile solvent = -11.5728444

### TS4c

| Center Number | Atomic Number | Atomic Type | Coordinates (Angstroms) |           |           |
|---------------|---------------|-------------|-------------------------|-----------|-----------|
|               |               |             | X                       | Y         | Z         |
| 1             | 26            | 0           | -1.194775               | 0.783179  | -3.033663 |
| 2             | 15            | 0           | -0.939513               | 2.046067  | 0.115450  |
| 3             | 15            | 0           | -0.920222               | -1.738832 | -0.749997 |
| 4             | 6             | 0           | -0.222200               | 3.885532  | 2.080486  |
| 5             | 6             | 0           | -2.673148               | 2.670210  | 0.165325  |
| 6             | 6             | 0           | -5.024307               | 2.199444  | 0.527741  |
| 7             | 6             | 0           | -0.024598               | 3.516974  | 0.743354  |
| 8             | 6             | 0           | -5.337739               | 3.526126  | 0.249066  |
| 9             | 6             | 0           | -2.999414               | 4.004107  | -0.101118 |
| 10            | 6             | 0           | -3.698170               | 1.777977  | 0.490846  |
| 11            | 6             | 0           | -4.323418               | 4.428515  | -0.062315 |
| 12            | 6             | 0           | 0.958996                | 4.177465  | 0.002330  |
| 13            | 6             | 0           | 1.734224                | 5.175395  | 0.589943  |
| 14            | 6             | 0           | -1.648109               | -1.054223 | -2.286567 |
| 15            | 6             | 0           | -1.184932               | -1.157437 | -3.639611 |
| 16            | 6             | 0           | 0.675796                | -2.388394 | -1.402852 |
| 17            | 6             | 0           | -0.561695               | 2.491826  | -3.950054 |

|    |    |   |           |           |           |
|----|----|---|-----------|-----------|-----------|
| 18 | 6  | 0 | -2.806312 | -0.208339 | -2.307331 |
| 19 | 6  | 0 | -2.045371 | -0.386681 | -4.471210 |
| 20 | 6  | 0 | 0.541418  | 4.889126  | 2.661063  |
| 21 | 6  | 0 | -3.049880 | 0.197078  | -3.648573 |
| 22 | 6  | 0 | 1.867444  | -1.782633 | -1.000932 |
| 23 | 6  | 0 | -0.554859 | 2.130651  | -1.663342 |
| 24 | 6  | 0 | 0.730221  | -3.445075 | -2.320850 |
| 25 | 6  | 0 | 0.550200  | 1.655113  | -3.643292 |
| 26 | 6  | 0 | -1.238644 | 2.793254  | -2.734317 |
| 27 | 6  | 0 | 0.558373  | 1.432177  | -2.239346 |
| 28 | 6  | 0 | -1.898070 | -3.293227 | -0.561546 |
| 29 | 6  | 0 | -3.255941 | -3.341179 | -0.890714 |
| 30 | 6  | 0 | 1.949130  | -3.870011 | -2.835884 |
| 31 | 6  | 0 | 3.090204  | -2.202788 | -1.521601 |
| 32 | 6  | 0 | 3.130611  | -3.244373 | -2.441440 |
| 33 | 6  | 0 | 1.529870  | 5.532365  | 1.917923  |
| 34 | 6  | 0 | -2.091795 | -5.517934 | 0.385527  |
| 35 | 6  | 0 | -1.327808 | -4.396677 | 0.084157  |
| 36 | 6  | 0 | -3.443923 | -5.554044 | 0.054294  |
| 37 | 6  | 0 | -4.021900 | -4.462484 | -0.585732 |
| 38 | 1  | 0 | 1.252464  | 0.797875  | -1.693068 |
| 39 | 1  | 0 | 1.232774  | 1.211316  | -4.360814 |
| 40 | 1  | 0 | -0.875425 | 2.794382  | -4.944421 |
| 41 | 1  | 0 | -2.158593 | 3.362265  | -2.637757 |
| 42 | 1  | 0 | -3.367905 | 0.114524  | -1.435357 |
| 43 | 1  | 0 | -3.826021 | 0.882404  | -3.973694 |
| 44 | 1  | 0 | -1.918094 | -0.220929 | -5.536472 |
| 45 | 1  | 0 | -0.287850 | -1.677619 | -3.960250 |
| 46 | 1  | 0 | -3.439137 | 0.741463  | 0.724486  |
| 47 | 1  | 0 | -5.811928 | 1.492647  | 0.784713  |
| 48 | 1  | 0 | -6.373353 | 3.861054  | 0.283448  |
| 49 | 1  | 0 | -4.564936 | 5.469838  | -0.271030 |
| 50 | 1  | 0 | -2.206494 | 4.716841  | -0.333097 |
| 51 | 1  | 0 | 1.129119  | 3.906665  | -1.039926 |
| 52 | 1  | 0 | 2.500729  | 5.678270  | 0.001557  |
| 53 | 1  | 0 | 2.139619  | 6.309263  | 2.376209  |
| 54 | 1  | 0 | 0.373805  | 5.163902  | 3.701388  |
| 55 | 1  | 0 | -0.979528 | 3.368961  | 2.673736  |
| 56 | 1  | 0 | -0.191257 | -3.940256 | -2.630030 |
| 57 | 1  | 0 | 1.978419  | -4.694164 | -3.547488 |
| 58 | 1  | 0 | 4.085205  | -3.577419 | -2.846273 |
| 59 | 1  | 0 | 4.010942  | -1.717915 | -1.195994 |
| 60 | 1  | 0 | 1.833398  | -0.979543 | -0.261654 |
| 61 | 1  | 0 | -0.270150 | -4.380654 | 0.350878  |
| 62 | 1  | 0 | -1.627345 | -6.368321 | 0.883549  |
| 63 | 1  | 0 | -4.043690 | -6.431010 | 0.292619  |
| 64 | 1  | 0 | -5.077091 | -4.483106 | -0.855184 |
| 65 | 1  | 0 | -3.723254 | -2.494982 | -1.394797 |
| 66 | 6  | 0 | 4.427894  | 0.010800  | 1.041262  |
| 67 | 6  | 0 | 3.600218  | 1.141127  | 1.029882  |
| 68 | 6  | 0 | 2.358710  | 1.128255  | 1.647908  |
| 69 | 6  | 0 | 1.891893  | -0.024054 | 2.299053  |
| 70 | 6  | 0 | 2.735805  | -1.144635 | 2.344126  |
| 71 | 6  | 0 | 3.977270  | -1.124700 | 1.726865  |
| 72 | 1  | 0 | 3.944608  | 2.057073  | 0.547943  |
| 73 | 1  | 0 | 1.744704  | 2.026302  | 1.652612  |
| 74 | 1  | 0 | 2.388084  | -2.046685 | 2.846802  |
| 75 | 1  | 0 | 4.595025  | -2.023428 | 1.736290  |
| 76 | 46 | 0 | -0.619615 | -0.183292 | 1.119544  |
| 77 | 6  | 0 | 5.721697  | 0.007747  | 0.332643  |
| 78 | 6  | 0 | 5.855065  | 0.647701  | -0.906491 |
| 79 | 6  | 0 | 6.840659  | -0.642962 | 0.866460  |
| 80 | 6  | 0 | 7.067610  | 0.643595  | -1.585265 |
| 81 | 1  | 0 | 4.982979  | 1.129734  | -1.350502 |
| 82 | 6  | 0 | 8.053226  | -0.647806 | 0.188034  |
| 83 | 1  | 0 | 6.761074  | -1.126130 | 1.840196  |
| 84 | 6  | 0 | 8.172629  | -0.003387 | -1.040018 |



|     |   |   |           |           |           |
|-----|---|---|-----------|-----------|-----------|
| 85  | 1 | 0 | 7.147253  | 1.141301  | -2.550695 |
| 86  | 1 | 0 | 8.913990  | -1.151265 | 0.625883  |
| 87  | 1 | 0 | 9.123169  | -0.006974 | -1.570891 |
| 88  | 6 | 0 | 0.126160  | -0.292331 | 4.154370  |
| 89  | 6 | 0 | 0.575101  | -0.077198 | 2.942980  |
| 90  | 6 | 0 | -1.129474 | -0.640624 | 3.474324  |
| 91  | 1 | 0 | 0.513757  | -0.367566 | 5.170322  |
| 92  | 6 | 0 | -1.574884 | -2.109975 | 3.602663  |
| 93  | 6 | 0 | -2.222598 | 0.402023  | 3.581606  |
| 94  | 1 | 0 | -3.038929 | 0.278384  | 2.860964  |
| 95  | 1 | 0 | -2.665257 | 0.359375  | 4.594197  |
| 96  | 1 | 0 | -1.804774 | 1.407253  | 3.455953  |
| 97  | 6 | 0 | -1.918971 | -2.363959 | 5.081240  |
| 98  | 1 | 0 | -2.742551 | -1.725226 | 5.428660  |
| 99  | 1 | 0 | -2.234630 | -3.408488 | 5.217296  |
| 100 | 1 | 0 | -1.053646 | -2.192530 | 5.736964  |
| 101 | 6 | 0 | -0.452394 | -3.071690 | 3.219548  |
| 102 | 1 | 0 | -0.802404 | -4.111879 | 3.291152  |
| 103 | 1 | 0 | -0.114864 | -2.885562 | 2.189277  |
| 104 | 1 | 0 | 0.413937  | -2.962262 | 3.887015  |
| 105 | 6 | 0 | -2.819783 | -2.408810 | 2.767248  |
| 106 | 1 | 0 | -3.701507 | -1.875342 | 3.149169  |
| 107 | 1 | 0 | -2.671709 | -2.119435 | 1.717792  |
| 108 | 1 | 0 | -3.050789 | -3.483856 | 2.791536  |

-----

Zero-point correction= 0.872796 (Hartree/Particle)  
Thermal correction to Energy= 0.926510  
Thermal correction to Enthalpy= 0.927455  
Thermal correction to Gibbs Free Energy= 0.783079  
Sum of electronic and zero-point Energies= -3018.136549  
Sum of electronic and thermal Energies= -3018.082834  
Sum of electronic and thermal Enthalpies= -3018.081890  
Sum of electronic and thermal Free Energies= -3018.226265  
M06/6-311++G(d,p)-SDD/SMD//m06/6-31G(d)-LANL2DZ energy in acetonitrile solvent = -3021.2990583

#### TS4c'

-----

| Center<br>Number | Atomic<br>Number | Atomic<br>Type | Coordinates (Angstroms) |           |           |
|------------------|------------------|----------------|-------------------------|-----------|-----------|
|                  |                  |                | X                       | Y         | Z         |
| 1                | 26               | 0              | 4.201823                | 0.985445  | -1.275744 |
| 2                | 15               | 0              | 1.322923                | 1.948364  | 0.267530  |
| 3                | 15               | 0              | 2.275596                | -1.658299 | -0.304487 |
| 4                | 6                | 0              | -0.170168               | 2.915314  | 2.382551  |
| 5                | 6                | 0              | 0.585479                | 2.996506  | -1.057781 |
| 6                | 6                | 0              | -0.473480               | 3.100478  | -3.238512 |
| 7                | 6                | 0              | 1.075374                | 3.004871  | 1.750575  |
| 8                | 6                | 0              | -0.495005               | 4.489349  | -3.166819 |
| 9                | 6                | 0              | 0.549346                | 4.393000  | -0.993150 |
| 10               | 6                | 0              | 0.059249                | 2.360117  | -2.186702 |
| 11               | 6                | 0              | 0.014218                | 5.133754  | -2.041570 |
| 12               | 6                | 0              | 2.036807                | 3.880109  | 2.262913  |
| 13               | 6                | 0              | 1.754534                | 4.652986  | 3.386247  |
| 14               | 6                | 0              | 3.434027                | -0.885322 | -1.486785 |
| 15               | 6                | 0              | 4.866817                | -0.914900 | -1.522799 |
| 16               | 6                | 0              | 3.399481                | -2.128282 | 1.073671  |
| 17               | 6                | 0              | 5.130465                | 2.778206  | -1.012731 |
| 18               | 6                | 0              | 3.007946                | -0.032395 | -2.558559 |
| 19               | 6                | 0              | 5.307473                | -0.096444 | -2.600561 |
| 20               | 6                | 0              | -0.454252               | 3.695360  | 3.496893  |
| 21               | 6                | 0              | 4.158773                | 0.447484  | -3.242430 |
| 22               | 6                | 0              | 3.211110                | -1.508539 | 2.312426  |
| 23               | 6                | 0              | 3.098242                | 2.193809  | -0.069546 |
| 24               | 6                | 0              | 4.430076                | -3.065613 | 0.937901  |
| 25               | 6                | 0              | 5.392866                | 1.916704  | 0.090977  |
| 26               | 6                | 0              | 3.721394                | 2.957534  | -1.108598 |
| 27               | 6                | 0              | 4.146102                | 1.550448  | 0.669537  |

|    |    |   |           |           |           |
|----|----|---|-----------|-----------|-----------|
| 28 | 6  | 0 | 1.919997  | -3.271812 | -1.116631 |
| 29 | 6  | 0 | 1.575171  | -3.286781 | -2.473190 |
| 30 | 6  | 0 | 5.262346  | -3.360717 | 2.012254  |
| 31 | 6  | 0 | 4.045235  | -1.800030 | 3.388356  |
| 32 | 6  | 0 | 5.072744  | -2.725670 | 3.237666  |
| 33 | 6  | 0 | 0.510266  | 4.563857  | 4.002550  |
| 34 | 6  | 0 | 1.311931  | -5.615410 | -0.982189 |
| 35 | 6  | 0 | 1.775668  | -4.450889 | -0.376920 |
| 36 | 6  | 0 | 0.979600  | -5.619611 | -2.332871 |
| 37 | 6  | 0 | 1.113851  | -4.450110 | -3.076717 |
| 38 | 1  | 0 | 4.006670  | 0.858243  | 1.495986  |
| 39 | 1  | 0 | 6.366663  | 1.548441  | 0.397733  |
| 40 | 1  | 0 | 5.870250  | 3.179595  | -1.698348 |
| 41 | 1  | 0 | 3.195858  | 3.520128  | -1.874614 |
| 42 | 1  | 0 | 1.977943  | 0.243162  | -2.766727 |
| 43 | 1  | 0 | 4.161084  | 1.152772  | -4.067083 |
| 44 | 1  | 0 | 6.340883  | 0.127956  | -2.846054 |
| 45 | 1  | 0 | 5.505082  | -1.416465 | -0.801943 |
| 46 | 1  | 0 | 0.059071  | 1.268343  | -2.226353 |
| 47 | 1  | 0 | -0.881406 | 2.590330  | -4.109834 |
| 48 | 1  | 0 | -0.916722 | 5.071818  | -3.984515 |
| 49 | 1  | 0 | -0.006945 | 6.220868  | -1.979620 |
| 50 | 1  | 0 | 0.947464  | 4.903905  | -0.115436 |
| 51 | 1  | 0 | 3.009420  | 3.964081  | 1.776626  |
| 52 | 1  | 0 | 2.510108  | 5.332339  | 3.778819  |
| 53 | 1  | 0 | 0.291441  | 5.169515  | 4.880731  |
| 54 | 1  | 0 | -1.428255 | 3.618387  | 3.977967  |
| 55 | 1  | 0 | -0.915432 | 2.220786  | 1.987381  |
| 56 | 1  | 0 | 4.571133  | -3.577173 | -0.015140 |
| 57 | 1  | 0 | 6.059237  | -4.093722 | 1.894743  |
| 58 | 1  | 0 | 5.722666  | -2.961331 | 4.079001  |
| 59 | 1  | 0 | 3.885436  | -1.310219 | 4.347589  |
| 60 | 1  | 0 | 2.394637  | -0.790064 | 2.426152  |
| 61 | 1  | 0 | 2.022458  | -4.461066 | 0.684949  |
| 62 | 1  | 0 | 1.210779  | -6.524986 | -0.391621 |
| 63 | 1  | 0 | 0.614424  | -6.530461 | -2.804489 |
| 64 | 1  | 0 | 0.855132  | -4.443067 | -4.134629 |
| 65 | 1  | 0 | 1.662149  | -2.374789 | -3.065051 |
| 66 | 46 | 0 | 0.368913  | -0.295592 | 0.239441  |
| 67 | 6  | 0 | -1.736563 | 0.127632  | 0.055585  |
| 68 | 6  | 0 | -2.823903 | -0.535547 | 0.399653  |
| 69 | 6  | 0 | -1.761931 | -1.541247 | 0.613445  |
| 70 | 1  | 0 | -1.622320 | 0.949187  | -0.667646 |
| 71 | 6  | 0 | -1.509627 | -1.976594 | 2.084538  |
| 72 | 6  | 0 | -2.790693 | -2.656660 | 2.594347  |
| 73 | 1  | 0 | -2.648000 | -2.999131 | 3.629713  |
| 74 | 1  | 0 | -3.643865 | -1.965144 | 2.583339  |
| 75 | 6  | 0 | -1.731550 | -2.652600 | -0.424929 |
| 76 | 1  | 0 | -0.780673 | -3.196933 | -0.456845 |
| 77 | 1  | 0 | -1.906336 | -2.234539 | -1.424389 |
| 78 | 1  | 0 | -2.527498 | -3.394225 | -0.236779 |
| 79 | 1  | 0 | -3.056758 | -3.539840 | 1.995455  |
| 80 | 6  | 0 | -0.368625 | -2.984380 | 2.216572  |
| 81 | 1  | 0 | -0.202346 | -3.225582 | 3.276814  |
| 82 | 1  | 0 | -0.587962 | -3.926389 | 1.694958  |
| 83 | 1  | 0 | 0.569795  | -2.579951 | 1.812408  |
| 84 | 6  | 0 | -1.230354 | -0.786438 | 2.999544  |
| 85 | 1  | 0 | -0.305753 | -0.260695 | 2.709678  |
| 86 | 1  | 0 | -2.050218 | -0.056205 | 2.969763  |
| 87 | 1  | 0 | -1.121470 | -1.131111 | 4.038259  |
| 88 | 6  | 0 | -4.254987 | -0.433768 | 0.223529  |
| 89 | 6  | 0 | -4.834661 | 0.827488  | 0.016385  |
| 90 | 6  | 0 | -5.099505 | -1.552623 | 0.233369  |
| 91 | 6  | 0 | -6.198162 | 0.961822  | -0.177795 |
| 92 | 1  | 0 | -4.193242 | 1.709242  | 0.028970  |
| 93 | 6  | 0 | -6.464124 | -1.414157 | 0.028346  |
| 94 | 1  | 0 | -4.671253 | -2.542315 | 0.388188  |

|     |   |   |            |           |           |
|-----|---|---|------------|-----------|-----------|
| 95  | 6 | 0 | -7.044195  | -0.156601 | -0.178184 |
| 96  | 1 | 0 | -6.628598  | 1.955477  | -0.302603 |
| 97  | 1 | 0 | -7.093663  | -2.303607 | 0.004064  |
| 98  | 6 | 0 | -8.496889  | -0.010640 | -0.386788 |
| 99  | 6 | 0 | -9.003671  | 0.954291  | -1.266523 |
| 100 | 6 | 0 | -9.409334  | -0.831807 | 0.287764  |
| 101 | 6 | 0 | -10.371664 | 1.094471  | -1.463321 |
| 102 | 1 | 0 | -8.310805  | 1.583640  | -1.824821 |
| 103 | 6 | 0 | -10.777487 | -0.694227 | 0.090046  |
| 104 | 1 | 0 | -9.037429  | -1.568202 | 0.999893  |
| 105 | 6 | 0 | -11.265801 | 0.270289  | -0.786460 |
| 106 | 1 | 0 | -10.742089 | 1.846122  | -2.159079 |
| 107 | 1 | 0 | -11.467628 | -1.338444 | 0.633040  |
| 108 | 1 | 0 | -12.338032 | 0.379628  | -0.940669 |

-----

Zero-point correction= 0.874557 (Hartree/Particle)  
Thermal correction to Energy= 0.927815  
Thermal correction to Enthalpy= 0.928759  
Thermal correction to Gibbs Free Energy= 0.784830  
Sum of electronic and zero-point Energies= -3018.132326  
Sum of electronic and thermal Energies= -3018.079068  
Sum of electronic and thermal Enthalpies= -3018.078124  
Sum of electronic and thermal Free Energies= -3018.222053  
M06/6-311++G(d,p)-SDD/SMD//m06/6-31G(d)-LANL2DZ energy in acetonitrile solvent = -3021.2979675

#### INT8c

-----

| Center<br>Number | Atomic<br>Number | Atomic<br>Type | Coordinates (Angstroms) |           |           |
|------------------|------------------|----------------|-------------------------|-----------|-----------|
|                  |                  |                | X                       | Y         | Z         |
| 1                | 26               | 0              | 2.213693                | -2.707172 | -1.307720 |
| 2                | 15               | 0              | -0.600868               | -0.937798 | -0.717291 |
| 3                | 15               | 0              | 2.764577                | 0.021637  | 0.615652  |
| 4                | 6                | 0              | -3.332056               | -0.766927 | -1.579538 |
| 5                | 6                | 0              | -1.330923               | -2.212169 | 0.384042  |
| 6                | 6                | 0              | -1.664940               | -3.003472 | 2.653251  |
| 7                | 6                | 0              | -1.993124               | -0.457531 | -1.824199 |
| 8                | 6                | 0              | -2.423315               | -4.067745 | 2.176283  |
| 9                | 6                | 0              | -2.094056               | -3.289099 | -0.082844 |
| 10               | 6                | 0              | -1.125283               | -2.082439 | 1.760164  |
| 11               | 6                | 0              | -2.636560               | -4.210012 | 0.807361  |
| 12               | 6                | 0              | -1.678715               | 0.346146  | -2.926318 |
| 13               | 6                | 0              | -2.676580               | 0.807987  | -3.774692 |
| 14               | 6                | 0              | 3.072221                | -1.748802 | 0.245173  |
| 15               | 6                | 0              | 4.077719                | -2.374135 | -0.562643 |
| 16               | 6                | 0              | 4.352914                | 0.779605  | 0.089248  |
| 17               | 6                | 0              | 1.570607                | -3.552223 | -3.047805 |
| 18               | 6                | 0              | 2.204612                | -2.789707 | 0.713505  |
| 19               | 6                | 0              | 3.810225                | -3.771472 | -0.608474 |
| 20               | 6                | 0              | -4.332636               | -0.300721 | -2.428115 |
| 21               | 6                | 0              | 2.656205                | -4.028186 | 0.183184  |
| 22               | 6                | 0              | 4.732100                | 0.680142  | -1.256850 |
| 23               | 6                | 0              | 0.447803                | -1.904358 | -1.863196 |
| 24               | 6                | 0              | 5.124974                | 1.566942  | 0.946435  |
| 25               | 6                | 0              | 2.215778                | -2.310580 | -3.310968 |
| 26               | 6                | 0              | 0.482382                | -3.307609 | -2.162582 |
| 27               | 6                | 0              | 1.527472                | -1.297970 | -2.587806 |
| 28               | 6                | 0              | 2.889832                | -0.056157 | 2.450421  |
| 29               | 6                | 0              | 3.956368                | -0.704562 | 3.084559  |
| 30               | 6                | 0              | 6.253361                | 2.231060  | 0.472074  |
| 31               | 6                | 0              | 5.866729                | 1.330275  | -1.725061 |
| 32               | 6                | 0              | 6.629490                | 2.112004  | -0.860792 |
| 33               | 6                | 0              | -4.008400               | 0.482923  | -3.528831 |
| 34               | 6                | 0              | 1.892183                | 0.366328  | 4.616346  |
| 35               | 6                | 0              | 1.856526                | 0.472049  | 3.227723  |
| 36               | 6                | 0              | 2.961057                | -0.269905 | 5.236777  |
| 37               | 6                | 0              | 3.993766                | -0.806442 | 4.469252  |

|     |    |   |            |           |           |
|-----|----|---|------------|-----------|-----------|
| 38  | 1  | 0 | 1.798338   | -0.245110 | -2.531948 |
| 39  | 1  | 0 | 3.109032   | -2.168116 | -3.911145 |
| 40  | 1  | 0 | 1.891466   | -4.525140 | -3.406142 |
| 41  | 1  | 0 | -0.161727  | -4.066304 | -1.729995 |
| 42  | 1  | 0 | 1.322664   | -2.650503 | 1.331386  |
| 43  | 1  | 0 | 2.171291   | -4.989479 | 0.319116  |
| 44  | 1  | 0 | 4.365374   | -4.504123 | -1.185524 |
| 45  | 1  | 0 | 4.880862   | -1.866895 | -1.085917 |
| 46  | 1  | 0 | -0.529092  | -1.244900 | 2.129409  |
| 47  | 1  | 0 | -1.494387  | -2.886343 | 3.722058  |
| 48  | 1  | 0 | -2.851376  | -4.787521 | 2.872192  |
| 49  | 1  | 0 | -3.232517  | -5.040191 | 0.431281  |
| 50  | 1  | 0 | -2.285779  | -3.396063 | -1.150938 |
| 51  | 1  | 0 | -0.642588  | 0.627459  | -3.118185 |
| 52  | 1  | 0 | -2.412012  | 1.429346  | -4.629133 |
| 53  | 1  | 0 | -4.791906  | 0.849960  | -4.190008 |
| 54  | 1  | 0 | -5.373044  | -0.539605 | -2.208691 |
| 55  | 1  | 0 | -3.609313  | -1.355396 | -0.705807 |
| 56  | 1  | 0 | 4.843755   | 1.666442  | 1.994504  |
| 57  | 1  | 0 | 6.841987   | 2.844656  | 1.152268  |
| 58  | 1  | 0 | 7.512421   | 2.631537  | -1.229012 |
| 59  | 1  | 0 | 6.147610   | 1.240403  | -2.773240 |
| 60  | 1  | 0 | 4.119160   | 0.103083  | -1.952590 |
| 61  | 1  | 0 | 1.016828   | 0.963840  | 2.728163  |
| 62  | 1  | 0 | 1.081967   | 0.784595  | 5.211427  |
| 63  | 1  | 0 | 2.991295   | -0.353139 | 6.322111  |
| 64  | 1  | 0 | 4.828358   | -1.311050 | 4.953740  |
| 65  | 1  | 0 | 4.761401   | -1.133946 | 2.486157  |
| 66  | 6  | 0 | -5.169053  | 1.154706  | 0.768802  |
| 67  | 6  | 0 | -4.179401  | 0.539787  | 1.547263  |
| 68  | 6  | 0 | -2.852536  | 0.922422  | 1.443039  |
| 69  | 6  | 0 | -2.451162  | 1.933284  | 0.557784  |
| 70  | 6  | 0 | -3.446954  | 2.570772  | -0.196954 |
| 71  | 6  | 0 | -4.776657  | 2.189904  | -0.089327 |
| 72  | 1  | 0 | -4.456207  | -0.249365 | 2.248372  |
| 73  | 1  | 0 | -2.092856  | 0.429692  | 2.050324  |
| 74  | 1  | 0 | -3.150973  | 3.344894  | -0.906194 |
| 75  | 1  | 0 | -5.523623  | 2.664295  | -0.727239 |
| 76  | 46 | 0 | 0.592248   | 1.075719  | 0.092542  |
| 77  | 6  | 0 | -6.568221  | 0.692327  | 0.816059  |
| 78  | 6  | 0 | -6.863947  | -0.670600 | 0.952417  |
| 79  | 6  | 0 | -7.637047  | 1.591115  | 0.710763  |
| 80  | 6  | 0 | -8.178753  | -1.118565 | 0.987030  |
| 81  | 1  | 0 | -6.044859  | -1.388967 | 1.008623  |
| 82  | 6  | 0 | -8.952254  | 1.144142  | 0.742673  |
| 83  | 1  | 0 | -7.427753  | 2.657618  | 0.628529  |
| 84  | 6  | 0 | -9.230102  | -0.212736 | 0.881789  |
| 85  | 1  | 0 | -8.383497  | -2.183743 | 1.087489  |
| 86  | 1  | 0 | -9.767034  | 1.863073  | 0.667079  |
| 87  | 1  | 0 | -10.261044 | -0.561993 | 0.907194  |
| 88  | 6  | 0 | -0.440720  | 3.460085  | 0.585353  |
| 89  | 6  | 0 | -1.052454  | 2.292438  | 0.403495  |
| 90  | 6  | 0 | 1.006574   | 3.233219  | 0.275710  |
| 91  | 1  | 0 | -0.877794  | 4.410510  | 0.942222  |
| 92  | 6  | 0 | 1.438067   | 3.885599  | -1.067235 |
| 93  | 6  | 0 | 1.907064   | 3.573108  | 1.445442  |
| 94  | 1  | 0 | 2.930295   | 3.186121  | 1.335475  |
| 95  | 1  | 0 | 1.987579   | 4.669151  | 1.582180  |
| 96  | 1  | 0 | 1.496980   | 3.173850  | 2.381716  |
| 97  | 6  | 0 | 1.123058   | 5.390588  | -1.016589 |
| 98  | 1  | 0 | 1.625315   | 5.891241  | -0.176741 |
| 99  | 1  | 0 | 1.466672   | 5.878759  | -1.940750 |
| 100 | 1  | 0 | 0.044099   | 5.575796  | -0.926596 |
| 101 | 6  | 0 | 0.685594   | 3.299164  | -2.261875 |
| 102 | 1  | 0 | 0.964840   | 3.833947  | -3.183170 |
| 103 | 1  | 0 | 0.935972   | 2.234222  | -2.392555 |
| 104 | 1  | 0 | -0.403543  | 3.367664  | -2.137591 |

|     |   |   |          |          |           |
|-----|---|---|----------|----------|-----------|
| 105 | 6 | 0 | 2.931625 | 3.721605 | -1.334087 |
| 106 | 1 | 0 | 3.556030 | 4.203432 | -0.569053 |
| 107 | 1 | 0 | 3.209227 | 2.661320 | -1.373569 |
| 108 | 1 | 0 | 3.194309 | 4.173175 | -2.302709 |

-----  
Zero-point correction= 0.877055 (Hartree/Particle)  
Thermal correction to Energy= 0.929890  
Thermal correction to Enthalpy= 0.930834  
Thermal correction to Gibbs Free Energy= 0.791368  
Sum of electronic and zero-point Energies= -3018.158121  
Sum of electronic and thermal Energies= -3018.105286  
Sum of electronic and thermal Enthalpies= -3018.104342  
Sum of electronic and thermal Free Energies= -3018.243809  
M06/6-311++G(d,p)-SDD/SMD//m06/6-31G(d)-LANL2DZ energy in acetonitrile solvent = -3021.3314067

### TS5c

-----

| Center<br>Number | Atomic<br>Number | Atomic<br>Type | Coordinates (Angstroms) |           |           |
|------------------|------------------|----------------|-------------------------|-----------|-----------|
|                  |                  |                | X                       | Y         | Z         |
| 1                | 26               | 0              | -0.913376               | -2.301386 | 2.203876  |
| 2                | 15               | 0              | 0.575441                | -1.303492 | -0.649986 |
| 3                | 15               | 0              | -2.544805               | 0.301117  | 0.507551  |
| 4                | 6                | 0              | 2.474735                | -1.487385 | -2.688055 |
| 5                | 6                | 0              | -0.330032               | -2.556597 | -1.650358 |
| 6                | 6                | 0              | -2.269160               | -3.123907 | -2.991762 |
| 7                | 6                | 0              | 2.272366                | -1.540855 | -1.303978 |
| 8                | 6                | 0              | -1.795964               | -4.423886 | -3.133715 |
| 9                | 6                | 0              | 0.155538                | -3.856654 | -1.832963 |
| 10               | 6                | 0              | -1.533268               | -2.195537 | -2.259432 |
| 11               | 6                | 0              | -0.577732               | -4.786109 | -2.561463 |
| 12               | 6                | 0              | 3.362773                | -1.767131 | -0.463640 |
| 13               | 6                | 0              | 4.633575                | -1.960067 | -0.997464 |
| 14               | 6                | 0              | -2.493660               | -1.181160 | 1.593748  |
| 15               | 6                | 0              | -2.456568               | -1.250095 | 3.024379  |
| 16               | 6                | 0              | -2.776764               | 1.604801  | 1.782882  |
| 17               | 6                | 0              | 0.628735                | -3.480186 | 2.831717  |
| 18               | 6                | 0              | -2.602206               | -2.526965 | 1.109244  |
| 19               | 6                | 0              | -2.526141               | -2.617815 | 3.409154  |
| 20               | 6                | 0              | 3.742807                | -1.686489 | -3.219017 |
| 21               | 6                | 0              | -2.623376               | -3.404923 | 2.227154  |
| 22               | 6                | 0              | -1.670610               | 1.898352  | 2.590804  |
| 23               | 6                | 0              | 0.685095                | -2.067678 | 0.997464  |
| 24               | 6                | 0              | -3.945660               | 2.349214  | 1.942949  |
| 25               | 6                | 0              | 0.802541                | -2.150767 | 3.310852  |
| 26               | 6                | 0              | 0.563075                | -3.434721 | 1.411110  |
| 27               | 6                | 0              | 0.844536                | -1.281950 | 2.187738  |
| 28               | 6                | 0              | -4.229315               | 0.029824  | -0.188157 |
| 29               | 6                | 0              | -5.294500               | -0.398008 | 0.614519  |
| 30               | 6                | 0              | -4.007194               | 3.365144  | 2.894683  |
| 31               | 6                | 0              | -1.738253               | 2.899776  | 3.550495  |
| 32               | 6                | 0              | -2.909006               | 3.640341  | 3.700820  |
| 33               | 6                | 0              | 4.824175                | -1.927895 | -2.374648 |
| 34               | 6                | 0              | -5.688039               | -0.058424 | -2.120878 |
| 35               | 6                | 0              | -4.439106               | 0.191167  | -1.557981 |
| 36               | 6                | 0              | -6.741188               | -0.470751 | -1.312984 |
| 37               | 6                | 0              | -6.543262               | -0.639237 | 0.056478  |
| 38               | 1                | 0              | 0.952300                | -0.200565 | 2.210804  |
| 39               | 1                | 0              | 0.842014                | -1.848382 | 4.352122  |
| 40               | 1                | 0              | 0.500618                | -4.366701 | 3.444859  |
| 41               | 1                | 0              | 0.365642                | -4.278586 | 0.757996  |
| 42               | 1                | 0              | -2.629041               | -2.821214 | 0.062917  |
| 43               | 1                | 0              | -2.641845               | -4.489106 | 2.180527  |
| 44               | 1                | 0              | -2.459207               | -2.995820 | 4.424410  |
| 45               | 1                | 0              | -2.349971               | -0.405598 | 3.697149  |
| 46               | 1                | 0              | -1.889077               | -1.169101 | -2.149306 |
| 47               | 1                | 0              | -3.211144               | -2.825691 | -3.450535 |

|     |    |   |           |           |           |
|-----|----|---|-----------|-----------|-----------|
| 48  | 1  | 0 | -2.367351 | -5.154276 | -3.704486 |
| 49  | 1  | 0 | -0.191914 | -5.795901 | -2.693632 |
| 50  | 1  | 0 | 1.125482  | -4.134433 | -1.418489 |
| 51  | 1  | 0 | 3.225138  | -1.783887 | 0.617902  |
| 52  | 1  | 0 | 5.477911  | -2.126514 | -0.328926 |
| 53  | 1  | 0 | 5.818732  | -2.082497 | -2.792358 |
| 54  | 1  | 0 | 3.888583  | -1.648422 | -4.297635 |
| 55  | 1  | 0 | 1.632075  | -1.284876 | -3.350845 |
| 56  | 1  | 0 | -4.814374 | 2.144102  | 1.318225  |
| 57  | 1  | 0 | -4.923339 | 3.943499  | 3.003493  |
| 58  | 1  | 0 | -2.961710 | 4.434306  | 4.443771  |
| 59  | 1  | 0 | -0.870034 | 3.116022  | 4.170827  |
| 60  | 1  | 0 | -0.743872 | 1.338856  | 2.451733  |
| 61  | 1  | 0 | -3.611074 | 0.522487  | -2.184904 |
| 62  | 1  | 0 | -5.835791 | 0.072238  | -3.191686 |
| 63  | 1  | 0 | -7.719756 | -0.664765 | -1.749467 |
| 64  | 1  | 0 | -7.365922 | -0.966510 | 0.690348  |
| 65  | 1  | 0 | -5.139534 | -0.547328 | 1.684026  |
| 66  | 6  | 0 | 5.002679  | 1.418848  | 0.096460  |
| 67  | 6  | 0 | 4.857654  | 1.490089  | -1.295807 |
| 68  | 6  | 0 | 3.610688  | 1.597357  | -1.889194 |
| 69  | 6  | 0 | 2.440799  | 1.665927  | -1.117750 |
| 70  | 6  | 0 | 2.594155  | 1.642928  | 0.280923  |
| 71  | 6  | 0 | 3.841566  | 1.508313  | 0.873525  |
| 72  | 1  | 0 | 5.746704  | 1.454868  | -1.926631 |
| 73  | 1  | 0 | 3.520507  | 1.608915  | -2.975568 |
| 74  | 1  | 0 | 1.695781  | 1.719148  | 0.898951  |
| 75  | 1  | 0 | 3.916523  | 1.444735  | 1.960422  |
| 76  | 46 | 0 | -0.587113 | 0.829016  | -0.852700 |
| 77  | 6  | 0 | 6.329298  | 1.228325  | 0.710992  |
| 78  | 6  | 0 | 7.300152  | 0.433892  | 0.085174  |
| 79  | 6  | 0 | 6.661301  | 1.827024  | 1.933455  |
| 80  | 6  | 0 | 8.554138  | 0.250103  | 0.654328  |
| 81  | 1  | 0 | 7.051341  | -0.064556 | -0.852717 |
| 82  | 6  | 0 | 7.913454  | 1.640514  | 2.506077  |
| 83  | 1  | 0 | 5.932979  | 2.472444  | 2.424398  |
| 84  | 6  | 0 | 8.867788  | 0.852353  | 1.869300  |
| 85  | 1  | 0 | 9.289256  | -0.375556 | 0.149479  |
| 86  | 1  | 0 | 8.149811  | 2.124800  | 3.452873  |
| 87  | 1  | 0 | 9.850048  | 0.709337  | 2.317083  |
| 88  | 6  | 0 | 0.422082  | 2.905863  | -1.741945 |
| 89  | 6  | 0 | 1.125166  | 1.734508  | -1.741610 |
| 90  | 6  | 0 | -1.002474 | 2.770201  | -1.965773 |
| 91  | 1  | 0 | 0.851930  | 3.862790  | -1.395102 |
| 92  | 6  | 0 | -1.873352 | 3.943676  | -1.486216 |
| 93  | 6  | 0 | -1.424698 | 2.154025  | -3.288512 |
| 94  | 1  | 0 | -2.383385 | 1.621134  | -3.242211 |
| 95  | 1  | 0 | -1.545747 | 2.943823  | -4.053333 |
| 96  | 1  | 0 | -0.665132 | 1.453984  | -3.649634 |
| 97  | 6  | 0 | -1.665263 | 5.136102  | -2.437362 |
| 98  | 1  | 0 | -2.014153 | 4.920127  | -3.456067 |
| 99  | 1  | 0 | -2.228791 | 6.008173  | -2.074155 |
| 100 | 1  | 0 | -0.606386 | 5.423440  | -2.495777 |
| 101 | 6  | 0 | -1.486970 | 4.402142  | -0.077912 |
| 102 | 1  | 0 | -2.187598 | 5.174107  | 0.274461  |
| 103 | 1  | 0 | -1.512347 | 3.571115  | 0.636530  |
| 104 | 1  | 0 | -0.479004 | 4.835180  | -0.045776 |
| 105 | 6  | 0 | -3.358315 | 3.585762  | -1.487914 |
| 106 | 1  | 0 | -3.730485 | 3.354136  | -2.495746 |
| 107 | 1  | 0 | -3.560233 | 2.717222  | -0.847001 |
| 108 | 1  | 0 | -3.952487 | 4.427999  | -1.102992 |

-----  
Zero-point correction= 0.874834 (Hartree/Particle)  
Thermal correction to Energy= 0.927704  
Thermal correction to Enthalpy= 0.928649  
Thermal correction to Gibbs Free Energy= 0.788678  
Sum of electronic and zero-point Energies= -3018.152779

Sum of electronic and thermal Energies= -3018.099909  
 Sum of electronic and thermal Enthalpies= -3018.098964  
 Sum of electronic and thermal Free Energies= -3018.238935  
 M06/6-311++G(d,p)-SDD/SMD//m06/6-31G(d)-LANL2DZ energy in acetonitrile solvent = -3021.3256137

INT9c

| Center Number | Atomic Number | Atomic Type | Coordinates (Angstroms) |           |           |
|---------------|---------------|-------------|-------------------------|-----------|-----------|
|               |               |             | X                       | Y         | Z         |
| 1             | 26            | 0           | -0.843356               | -2.220134 | 2.266347  |
| 2             | 15            | 0           | 0.578665                | -1.324172 | -0.674390 |
| 3             | 15            | 0           | -2.526152               | 0.303586  | 0.517145  |
| 4             | 6             | 0           | 2.465872                | -1.583440 | -2.717100 |
| 5             | 6             | 0           | -0.340529               | -2.621346 | -1.603181 |
| 6             | 6             | 0           | -2.327683               | -3.272878 | -2.830999 |
| 7             | 6             | 0           | 2.270609                | -1.585732 | -1.330972 |
| 8             | 6             | 0           | -1.832114               | -4.566406 | -2.955256 |
| 9             | 6             | 0           | 0.164335                | -3.916571 | -1.766434 |
| 10            | 6             | 0           | -1.579532               | -2.305787 | -2.164346 |
| 11            | 6             | 0           | -0.580611               | -4.884209 | -2.430436 |
| 12            | 6             | 0           | 3.366498                | -1.776044 | -0.488557 |
| 13            | 6             | 0           | 4.635913                | -1.981238 | -1.020856 |
| 14            | 6             | 0           | -2.447123               | -1.133555 | 1.660414  |
| 15            | 6             | 0           | -2.360383               | -1.135664 | 3.090788  |
| 16            | 6             | 0           | -2.756570               | 1.652298  | 1.746986  |
| 17            | 6             | 0           | 0.726320                | -3.366516 | 2.885592  |
| 18            | 6             | 0           | -2.567757               | -2.500487 | 1.242874  |
| 19            | 6             | 0           | -2.412247               | -2.484276 | 3.540858  |
| 20            | 6             | 0           | 3.732810                | -1.795558 | -3.246015 |
| 21            | 6             | 0           | -2.547594               | -3.325425 | 2.400437  |
| 22            | 6             | 0           | -1.645218               | 1.989933  | 2.530039  |
| 23            | 6             | 0           | 0.714471                | -2.020111 | 1.001664  |
| 24            | 6             | 0           | -3.934525               | 2.384416  | 1.897565  |
| 25            | 6             | 0           | 0.904198                | -2.019718 | 3.311641  |
| 26            | 6             | 0           | 0.616713                | -3.372244 | 1.467074  |
| 27            | 6             | 0           | 0.903211                | -1.191107 | 2.157792  |
| 28            | 6             | 0           | -4.218235               | -0.002160 | -0.145591 |
| 29            | 6             | 0           | -5.265498               | -0.433923 | 0.678500  |
| 30            | 6             | 0           | -4.000299               | 3.430439  | 2.816007  |
| 31            | 6             | 0           | -1.716227               | 3.022361  | 3.456387  |
| 32            | 6             | 0           | -2.896462               | 3.749544  | 3.597702  |
| 33            | 6             | 0           | 4.820030                | -1.998476 | -2.399002 |
| 34            | 6             | 0           | -5.709231               | -0.121998 | -2.052767 |
| 35            | 6             | 0           | -4.453654               | 0.144985  | -1.512915 |
| 36            | 6             | 0           | -6.743845               | -0.539349 | -1.223809 |
| 37            | 6             | 0           | -6.520602               | -0.694114 | 0.143308  |
| 38            | 1             | 0           | 0.999682                | -0.108610 | 2.138772  |
| 39            | 1             | 0           | 0.972531                | -1.679987 | 4.339844  |
| 40            | 1             | 0           | 0.625751                | -4.231409 | 3.533734  |
| 41            | 1             | 0           | 0.405382                | -4.240563 | 0.851365  |
| 42            | 1             | 0           | -2.633788               | -2.844840 | 0.214092  |
| 43            | 1             | 0           | -2.565135               | -4.410594 | 2.405020  |
| 44            | 1             | 0           | -2.310408               | -2.814674 | 4.569731  |
| 45            | 1             | 0           | -2.233548               | -0.258357 | 3.716908  |
| 46            | 1             | 0           | -1.954120               | -1.284472 | -2.069982 |
| 47            | 1             | 0           | -3.296698               | -3.009988 | -3.253593 |
| 48            | 1             | 0           | -2.412516               | -5.326727 | -3.475633 |
| 49            | 1             | 0           | -0.178746               | -5.889441 | -2.548956 |
| 50            | 1             | 0           | 1.157240                | -4.161627 | -1.387234 |
| 51            | 1             | 0           | 3.235660                | -1.756171 | 0.593392  |
| 52            | 1             | 0           | 5.483159                | -2.119827 | -0.349715 |
| 53            | 1             | 0           | 5.813383                | -2.162036 | -2.816065 |
| 54            | 1             | 0           | 3.873103                | -1.796965 | -4.326029 |
| 55            | 1             | 0           | 1.619915                | -1.408938 | -3.383051 |
| 56            | 1             | 0           | -4.808684               | 2.144214  | 1.293117  |
| 57            | 1             | 0           | -4.924418               | 3.997265  | 2.918307  |

|     |    |   |           |           |           |
|-----|----|---|-----------|-----------|-----------|
| 58  | 1  | 0 | -2.951942 | 4.566797  | 4.314775  |
| 59  | 1  | 0 | -0.843989 | 3.271135  | 4.058733  |
| 60  | 1  | 0 | -0.712908 | 1.437112  | 2.401700  |
| 61  | 1  | 0 | -3.640178 | 0.478761  | -2.157221 |
| 62  | 1  | 0 | -5.876150 | -0.002085 | -3.122006 |
| 63  | 1  | 0 | -7.727337 | -0.748152 | -1.641946 |
| 64  | 1  | 0 | -7.328440 | -1.025405 | 0.793958  |
| 65  | 1  | 0 | -5.092537 | -0.571184 | 1.746897  |
| 66  | 6  | 0 | 4.964018  | 1.438792  | 0.044562  |
| 67  | 6  | 0 | 4.848954  | 1.450515  | -1.352446 |
| 68  | 6  | 0 | 3.613140  | 1.516257  | -1.974698 |
| 69  | 6  | 0 | 2.423837  | 1.612040  | -1.234752 |
| 70  | 6  | 0 | 2.551428  | 1.658248  | 0.166487  |
| 71  | 6  | 0 | 3.785979  | 1.552513  | 0.792167  |
| 72  | 1  | 0 | 5.751471  | 1.396407  | -1.962491 |
| 73  | 1  | 0 | 3.543364  | 1.479163  | -3.061935 |
| 74  | 1  | 0 | 1.642559  | 1.760474  | 0.765167  |
| 75  | 1  | 0 | 3.837572  | 1.533208  | 1.882225  |
| 76  | 46 | 0 | -0.600744 | 0.789756  | -0.883334 |
| 77  | 6  | 0 | 6.277759  | 1.284424  | 0.696081  |
| 78  | 6  | 0 | 7.269766  | 0.473806  | 0.126718  |
| 79  | 6  | 0 | 6.574976  | 1.934589  | 1.901132  |
| 80  | 6  | 0 | 8.509931  | 0.321935  | 0.734478  |
| 81  | 1  | 0 | 7.048963  | -0.062865 | -0.797003 |
| 82  | 6  | 0 | 7.813196  | 1.780360  | 2.512152  |
| 83  | 1  | 0 | 5.830997  | 2.594506  | 2.347189  |
| 84  | 6  | 0 | 8.788147  | 0.973847  | 1.932253  |
| 85  | 1  | 0 | 9.261434  | -0.318348 | 0.274018  |
| 86  | 1  | 0 | 8.022791  | 2.303959  | 3.444247  |
| 87  | 1  | 0 | 9.759490  | 0.855154  | 2.409943  |
| 88  | 6  | 0 | 0.357367  | 2.782497  | -1.726694 |
| 89  | 6  | 0 | 1.128471  | 1.642182  | -1.915342 |
| 90  | 6  | 0 | -1.032478 | 2.739169  | -2.047752 |
| 91  | 1  | 0 | 0.741970  | 3.652984  | -1.167515 |
| 92  | 6  | 0 | -1.913800 | 3.912009  | -1.595707 |
| 93  | 6  | 0 | -1.441881 | 2.072546  | -3.345584 |
| 94  | 1  | 0 | -2.366054 | 1.484274  | -3.279196 |
| 95  | 1  | 0 | -1.622016 | 2.843096  | -4.116233 |
| 96  | 1  | 0 | -0.642836 | 1.415028  | -3.701087 |
| 97  | 6  | 0 | -1.717122 | 5.076479  | -2.583501 |
| 98  | 1  | 0 | -2.071692 | 4.832807  | -3.593565 |
| 99  | 1  | 0 | -2.281552 | 5.955701  | -2.239742 |
| 100 | 1  | 0 | -0.658264 | 5.361843  | -2.653484 |
| 101 | 6  | 0 | -1.542600 | 4.428113  | -0.202612 |
| 102 | 1  | 0 | -2.302584 | 5.142930  | 0.146214  |
| 103 | 1  | 0 | -1.481245 | 3.614173  | 0.529578  |
| 104 | 1  | 0 | -0.579330 | 4.954013  | -0.198876 |
| 105 | 6  | 0 | -3.393269 | 3.529059  | -1.591821 |
| 106 | 1  | 0 | -3.746637 | 3.222744  | -2.586192 |
| 107 | 1  | 0 | -3.588976 | 2.703042  | -0.894826 |
| 108 | 1  | 0 | -4.005073 | 4.385863  | -1.273357 |

-----  
Zero-point correction= 0.876214 (Hartree/Particle)  
Thermal correction to Energy= 0.929404  
Thermal correction to Enthalpy= 0.930348  
Thermal correction to Gibbs Free Energy= 0.790396  
Sum of electronic and zero-point Energies= -3018.151856  
Sum of electronic and thermal Energies= -3018.098667  
Sum of electronic and thermal Enthalpies= -3018.097723  
Sum of electronic and thermal Free Energies= -3018.237675  
M06/6-311++G(d,p)-SDD/SMD//m06/6-31G(d)-LANL2DZ energy in acetonitrile solvent = -3021.327666

#### TS6c

-----  
Center Atomic Atomic Coordinates (Angstroms)  
Number Number Type X Y Z  
-----



|    |    |   |           |           |           |
|----|----|---|-----------|-----------|-----------|
| 1  | 26 | 0 | 2.842797  | 1.928043  | -2.582562 |
| 2  | 15 | 0 | 0.166949  | 0.253811  | -1.276361 |
| 3  | 15 | 0 | 3.573543  | 0.230186  | 0.334364  |
| 4  | 6  | 0 | -2.506906 | -0.569502 | -1.380756 |
| 5  | 6  | 0 | 0.518686  | -1.240619 | -2.306556 |
| 6  | 6  | 0 | 1.712386  | -3.345096 | -2.542243 |
| 7  | 6  | 0 | -1.625391 | 0.482146  | -1.652235 |
| 8  | 6  | 0 | 1.179587  | -3.511562 | -3.819451 |
| 9  | 6  | 0 | -0.031210 | -1.432541 | -3.580569 |
| 10 | 6  | 0 | 1.372598  | -2.220527 | -1.790846 |
| 11 | 6  | 0 | 0.299488  | -2.557461 | -4.333043 |
| 12 | 6  | 0 | -2.127486 | 1.652212  | -2.225983 |
| 13 | 6  | 0 | -3.478381 | 1.751982  | -2.554415 |
| 14 | 6  | 0 | 4.029883  | 0.894833  | -1.309958 |
| 15 | 6  | 0 | 4.632087  | 2.154864  | -1.629235 |
| 16 | 6  | 0 | 4.392715  | 1.456578  | 1.429969  |
| 17 | 6  | 0 | 1.709175  | 3.013167  | -3.890833 |
| 18 | 6  | 0 | 3.862861  | 0.181304  | -2.544043 |
| 19 | 6  | 0 | 4.813526  | 2.219378  | -3.037916 |
| 20 | 6  | 0 | -3.849727 | -0.477490 | -1.727372 |
| 21 | 6  | 0 | 4.345252  | 1.000057  | -3.601437 |
| 22 | 6  | 0 | 3.841647  | 2.743798  | 1.488645  |
| 23 | 6  | 0 | 0.889033  | 1.611605  | -2.240818 |
| 24 | 6  | 0 | 5.472659  | 1.147336  | 2.257715  |
| 25 | 6  | 0 | 1.811639  | 3.697737  | -2.647112 |
| 26 | 6  | 0 | 1.136976  | 1.733702  | -3.649026 |
| 27 | 6  | 0 | 1.302204  | 2.844354  | -1.632254 |
| 28 | 6  | 0 | 4.674208  | -1.239536 | 0.371403  |
| 29 | 6  | 0 | 5.992658  | -1.195391 | -0.097988 |
| 30 | 6  | 0 | 5.986603  | 2.103044  | 3.131612  |
| 31 | 6  | 0 | 4.367163  | 3.701732  | 2.346427  |
| 32 | 6  | 0 | 5.438479  | 3.379453  | 3.177410  |
| 33 | 6  | 0 | -4.339128 | 0.683278  | -2.324431 |
| 34 | 6  | 0 | 4.955404  | -3.593236 | 0.873532  |
| 35 | 6  | 0 | 4.164312  | -2.447939 | 0.848083  |
| 36 | 6  | 0 | 6.266951  | -3.536246 | 0.415155  |
| 37 | 6  | 0 | 6.784277  | -2.336770 | -0.071710 |
| 38 | 1  | 0 | 1.247434  | 3.061962  | -0.568697 |
| 39 | 1  | 0 | 2.252703  | 4.677156  | -2.494361 |
| 40 | 1  | 0 | 2.070197  | 3.376314  | -4.847798 |
| 41 | 1  | 0 | 0.990090  | 0.958387  | -4.394624 |
| 42 | 1  | 0 | 3.415986  | -0.803531 | -2.654259 |
| 43 | 1  | 0 | 4.305943  | 0.759639  | -4.658867 |
| 44 | 1  | 0 | 5.192717  | 3.073588  | -3.589286 |
| 45 | 1  | 0 | 4.864696  | 2.943316  | -0.920812 |
| 46 | 1  | 0 | 1.778757  | -2.086886 | -0.785086 |
| 47 | 1  | 0 | 2.409355  | -4.076908 | -2.133214 |
| 48 | 1  | 0 | 1.456821  | -4.376738 | -4.420620 |
| 49 | 1  | 0 | -0.120000 | -2.684161 | -5.330205 |
| 50 | 1  | 0 | -0.730046 | -0.698234 | -3.983582 |
| 51 | 1  | 0 | -1.465848 | 2.493465  | -2.429764 |
| 52 | 1  | 0 | -3.854948 | 2.672975  | -2.997658 |
| 53 | 1  | 0 | -5.387938 | 0.759408  | -2.612780 |
| 54 | 1  | 0 | -4.499481 | -1.329822 | -1.517129 |
| 55 | 1  | 0 | -2.151634 | -1.447737 | -0.842311 |
| 56 | 1  | 0 | 5.915420  | 0.152205  | 2.229905  |
| 57 | 1  | 0 | 6.824847  | 1.844932  | 3.776520  |
| 58 | 1  | 0 | 5.842610  | 4.123764  | 3.860909  |
| 59 | 1  | 0 | 3.931103  | 4.698724  | 2.378245  |
| 60 | 1  | 0 | 2.985991  | 2.993688  | 0.858697  |
| 61 | 1  | 0 | 3.133610  | -2.477891 | 1.204285  |
| 62 | 1  | 0 | 4.549350  | -4.528226 | 1.256978  |
| 63 | 1  | 0 | 6.890721  | -4.428233 | 0.434360  |
| 64 | 1  | 0 | 7.809926  | -2.292832 | -0.433563 |
| 65 | 1  | 0 | 6.399335  | -0.259762 | -0.484344 |
| 66 | 6  | 0 | -3.219229 | 3.346518  | 0.734507  |
| 67 | 6  | 0 | -3.781642 | 2.092875  | 1.005574  |

|     |    |   |           |           |           |
|-----|----|---|-----------|-----------|-----------|
| 68  | 6  | 0 | -2.999120 | 1.014550  | 1.389093  |
| 69  | 6  | 0 | -1.611291 | 1.136396  | 1.548410  |
| 70  | 6  | 0 | -1.058991 | 2.410267  | 1.326790  |
| 71  | 6  | 0 | -1.835969 | 3.481664  | 0.909694  |
| 72  | 1  | 0 | -4.863741 | 1.973100  | 0.907848  |
| 73  | 1  | 0 | -3.429063 | 0.034331  | 1.597350  |
| 74  | 1  | 0 | 0.019830  | 2.543000  | 1.446177  |
| 75  | 1  | 0 | -1.358213 | 4.436487  | 0.685902  |
| 76  | 46 | 0 | 1.227434  | -0.015549 | 0.922899  |
| 77  | 6  | 0 | -4.045617 | 4.474192  | 0.264331  |
| 78  | 6  | 0 | -5.141665 | 4.260850  | -0.582695 |
| 79  | 6  | 0 | -3.756250 | 5.789855  | 0.647612  |
| 80  | 6  | 0 | -5.919687 | 5.322612  | -1.028362 |
| 81  | 1  | 0 | -5.363140 | 3.247309  | -0.920300 |
| 82  | 6  | 0 | -4.531795 | 6.852355  | 0.201226  |
| 83  | 1  | 0 | -2.928697 | 5.977235  | 1.331302  |
| 84  | 6  | 0 | -5.617500 | 6.624085  | -0.639166 |
| 85  | 1  | 0 | -6.761625 | 5.134575  | -1.693382 |
| 86  | 1  | 0 | -4.292293 | 7.865709  | 0.519236  |
| 87  | 1  | 0 | -6.225666 | 7.456673  | -0.987906 |
| 88  | 6  | 0 | 0.128577  | 0.164176  | 2.926385  |
| 89  | 6  | 0 | -0.805467 | -0.055068 | 1.888827  |
| 90  | 6  | 0 | 1.140896  | -0.749494 | 3.266369  |
| 91  | 1  | 0 | 0.169572  | 1.144990  | 3.419252  |
| 92  | 6  | 0 | 2.149925  | -0.378934 | 4.357973  |
| 93  | 6  | 0 | 0.961073  | -2.224111 | 3.020694  |
| 94  | 1  | 0 | 1.904581  | -2.732053 | 2.790174  |
| 95  | 1  | 0 | 0.578651  | -2.689811 | 3.943668  |
| 96  | 1  | 0 | 0.232507  | -2.441161 | 2.236824  |
| 97  | 6  | 0 | 1.540286  | -0.798115 | 5.710309  |
| 98  | 1  | 0 | 1.415861  | -1.885060 | 5.796959  |
| 99  | 1  | 0 | 2.203512  | -0.476853 | 6.525829  |
| 100 | 1  | 0 | 0.559825  | -0.326806 | 5.865771  |
| 101 | 6  | 0 | 2.430382  | 1.124204  | 4.431679  |
| 102 | 1  | 0 | 3.281400  | 1.310517  | 5.101099  |
| 103 | 1  | 0 | 2.678758  | 1.544355  | 3.449279  |
| 104 | 1  | 0 | 1.577296  | 1.684460  | 4.835855  |
| 105 | 6  | 0 | 3.474763  | -1.123818 | 4.175646  |
| 106 | 1  | 0 | 3.360341  | -2.210639 | 4.282166  |
| 107 | 1  | 0 | 3.919341  | -0.925826 | 3.190655  |
| 108 | 1  | 0 | 4.195147  | -0.796134 | 4.937896  |
| 109 | 6  | 0 | -3.028730 | -2.573998 | 1.238178  |
| 110 | 8  | 0 | -3.726676 | -3.167348 | 0.360385  |
| 111 | 8  | 0 | -1.695420 | -2.451872 | 0.946019  |
| 112 | 8  | 0 | -3.443451 | -2.062780 | 2.298772  |
| 113 | 1  | 0 | -1.339313 | -1.542489 | 1.399656  |
| 114 | 55 | 0 | -1.625498 | -4.429024 | -1.304861 |
| 115 | 55 | 0 | -6.119109 | -1.466985 | 1.416911  |

-----  
Zero-point correction= 0.907346 (Hartree/Particle)  
Thermal correction to Energy= 0.968133  
Thermal correction to Enthalpy= 0.969077  
Thermal correction to Gibbs Free Energy= 0.809870  
Sum of electronic and zero-point Energies= -3322.097139  
Sum of electronic and thermal Energies= -3322.036352  
Sum of electronic and thermal Enthalpies= -3322.035408  
Sum of electronic and thermal Free Energies= -3322.194615  
M06/6-311++G(d,p)-SDD/SMD//m06/6-31G(d)-LANL2DZ energy in acetonitrile solvent = -3326.0353435

### INT10c

| Center Number | Atomic Number | Atomic Type | Coordinates (Angstroms) |           |           |
|---------------|---------------|-------------|-------------------------|-----------|-----------|
|               |               |             | X                       | Y         | Z         |
| 1             | 26            | 0           | -4.921803               | 0.398045  | -0.453883 |
| 2             | 15            | 0           | -2.267813               | 0.673842  | 1.636303  |
| 3             | 15            | 0           | -2.515128               | -2.027161 | -0.900361 |

|    |   |   |           |           |           |
|----|---|---|-----------|-----------|-----------|
| 4  | 6 | 0 | -0.630196 | 1.896355  | 3.531500  |
| 5  | 6 | 0 | -3.108270 | -0.182947 | 3.023743  |
| 6  | 6 | 0 | -3.682165 | -2.281055 | 4.091839  |
| 7  | 6 | 0 | -1.546432 | 2.127624  | 2.497818  |
| 8  | 6 | 0 | -4.381207 | -1.590510 | 5.076625  |
| 9  | 6 | 0 | -3.797085 | 0.503391  | 4.029715  |
| 10 | 6 | 0 | -3.042639 | -1.577506 | 3.075415  |
| 11 | 6 | 0 | -4.433323 | -0.198048 | 5.047863  |
| 12 | 6 | 0 | -1.843348 | 3.443428  | 2.139226  |
| 13 | 6 | 0 | -1.250498 | 4.507941  | 2.815747  |
| 14 | 6 | 0 | -4.261080 | -1.467759 | -0.912365 |
| 15 | 6 | 0 | -5.017971 | -0.927538 | -2.001206 |
| 16 | 6 | 0 | -2.192877 | -2.137350 | -2.707811 |
| 17 | 6 | 0 | -5.638434 | 2.269026  | -0.061610 |
| 18 | 6 | 0 | -5.126134 | -1.496895 | 0.231755  |
| 19 | 6 | 0 | -6.324405 | -0.619942 | -1.528383 |
| 20 | 6 | 0 | -0.044183 | 2.958182  | 4.208851  |
| 21 | 6 | 0 | -6.392960 | -0.977904 | -0.152455 |
| 22 | 6 | 0 | -1.892722 | -0.941351 | -3.372785 |
| 23 | 6 | 0 | -3.617088 | 1.428286  | 0.687513  |
| 24 | 6 | 0 | -2.159334 | -3.332868 | -3.426103 |
| 25 | 6 | 0 | -4.720012 | 2.310700  | -1.149110 |
| 26 | 6 | 0 | -4.963111 | 1.735667  | 1.071383  |
| 27 | 6 | 0 | -3.476090 | 1.795890  | -0.693089 |
| 28 | 6 | 0 | -2.752657 | -3.764388 | -0.356932 |
| 29 | 6 | 0 | -3.833986 | -4.543459 | -0.787285 |
| 30 | 6 | 0 | -1.826563 | -3.334536 | -4.778826 |
| 31 | 6 | 0 | -1.572968 | -0.941537 | -4.725132 |
| 32 | 6 | 0 | -1.531844 | -2.142772 | -5.430716 |
| 33 | 6 | 0 | -0.356239 | 4.270214  | 3.853521  |
| 34 | 6 | 0 | -2.007884 | -5.609905 | 1.026443  |
| 35 | 6 | 0 | -1.848509 | -4.308095 | 0.557979  |
| 36 | 6 | 0 | -3.078133 | -6.378810 | 0.582448  |
| 37 | 6 | 0 | -3.991338 | -5.843998 | -0.324215 |
| 38 | 1 | 0 | -2.572473 | 1.663427  | -1.282916 |
| 39 | 1 | 0 | -4.948901 | 2.621033  | -2.163381 |
| 40 | 1 | 0 | -6.689484 | 2.536073  | -0.105784 |
| 41 | 1 | 0 | -5.410006 | 1.523408  | 2.037901  |
| 42 | 1 | 0 | -4.848069 | -1.826471 | 1.229384  |
| 43 | 1 | 0 | -7.239715 | -0.820907 | 0.507610  |
| 44 | 1 | 0 | -7.111985 | -0.143709 | -2.103400 |
| 45 | 1 | 0 | -4.641755 | -0.742436 | -3.002701 |
| 46 | 1 | 0 | -2.486332 | -2.112376 | 2.302651  |
| 47 | 1 | 0 | -3.626794 | -3.368374 | 4.114005  |
| 48 | 1 | 0 | -4.880129 | -2.135685 | 5.876099  |
| 49 | 1 | 0 | -4.968151 | 0.342821  | 5.826894  |
| 50 | 1 | 0 | -3.822181 | 1.594252  | 4.021056  |
| 51 | 1 | 0 | -2.551423 | 3.645150  | 1.335669  |
| 52 | 1 | 0 | -1.507819 | 5.529656  | 2.537903  |
| 53 | 1 | 0 | 0.094507  | 5.103629  | 4.390422  |
| 54 | 1 | 0 | 0.651582  | 2.763780  | 5.024054  |
| 55 | 1 | 0 | -0.387637 | 0.869597  | 3.815366  |
| 56 | 1 | 0 | -2.371628 | -4.276740 | -2.925134 |
| 57 | 1 | 0 | -1.796305 | -4.276564 | -5.323954 |
| 58 | 1 | 0 | -1.271494 | -2.146964 | -6.487685 |
| 59 | 1 | 0 | -1.352744 | -0.002608 | -5.231744 |
| 60 | 1 | 0 | -1.913170 | -0.000814 | -2.817003 |
| 61 | 1 | 0 | -1.021903 | -3.689951 | 0.914024  |
| 62 | 1 | 0 | -1.296728 | -6.020478 | 1.741400  |
| 63 | 1 | 0 | -3.207724 | -7.395723 | 0.948892  |
| 64 | 1 | 0 | -4.834787 | -6.442023 | -0.665058 |
| 65 | 1 | 0 | -4.560041 | -4.125675 | -1.486416 |
| 66 | 6 | 0 | 0.846364  | 4.505910  | -0.732980 |
| 67 | 6 | 0 | 1.372586  | 4.055636  | 0.484727  |
| 68 | 6 | 0 | 1.405826  | 2.705002  | 0.803031  |
| 69 | 6 | 0 | 0.925836  | 1.725337  | -0.081093 |
| 70 | 6 | 0 | 0.404179  | 2.178654  | -1.307078 |

|     |    |   |           |           |           |
|-----|----|---|-----------|-----------|-----------|
| 71  | 6  | 0 | 0.360863  | 3.530749  | -1.618592 |
| 72  | 1  | 0 | 1.776463  | 4.776954  | 1.195401  |
| 73  | 1  | 0 | 1.809291  | 2.390363  | 1.767014  |
| 74  | 1  | 0 | 0.004923  | 1.454511  | -2.019373 |
| 75  | 1  | 0 | -0.092135 | 3.844665  | -2.559561 |
| 76  | 46 | 0 | -0.851243 | -0.652806 | 0.205210  |
| 77  | 6  | 0 | 0.792611  | 5.943883  | -1.057738 |
| 78  | 6  | 0 | 0.600788  | 6.895161  | -0.047690 |
| 79  | 6  | 0 | 0.930797  | 6.398962  | -2.375103 |
| 80  | 6  | 0 | 0.552841  | 8.251613  | -0.342537 |
| 81  | 1  | 0 | 0.458490  | 6.560161  | 0.979597  |
| 82  | 6  | 0 | 0.879391  | 7.755380  | -2.671987 |
| 83  | 1  | 0 | 1.100217  | 5.680385  | -3.177558 |
| 84  | 6  | 0 | 0.692212  | 8.688256  | -1.656502 |
| 85  | 1  | 0 | 0.394698  | 8.973082  | 0.457348  |
| 86  | 1  | 0 | 0.992866  | 8.086920  | -3.702861 |
| 87  | 1  | 0 | 0.652340  | 9.750685  | -1.888932 |
| 88  | 6  | 0 | 1.187736  | -0.750291 | -0.662048 |
| 89  | 6  | 0 | 1.070027  | 0.305570  | 0.273313  |
| 90  | 6  | 0 | 2.208581  | -1.866763 | -0.409968 |
| 91  | 1  | 0 | 1.067964  | -0.485314 | -1.718291 |
| 92  | 6  | 0 | 2.374593  | -2.787459 | -1.669163 |
| 93  | 6  | 0 | 1.884430  | -2.642082 | 0.857000  |
| 94  | 1  | 0 | 0.975317  | -3.233517 | 0.698892  |
| 95  | 1  | 0 | 2.707597  | -3.297704 | 1.146371  |
| 96  | 1  | 0 | 1.689975  | -1.953162 | 1.689121  |
| 97  | 6  | 0 | 3.214601  | -4.031954 | -1.367990 |
| 98  | 1  | 0 | 2.698222  | -4.711850 | -0.677726 |
| 99  | 1  | 0 | 3.386723  | -4.586692 | -2.301597 |
| 100 | 1  | 0 | 4.181803  | -3.779193 | -0.922661 |
| 101 | 6  | 0 | 3.073050  | -2.028582 | -2.805405 |
| 102 | 1  | 0 | 3.105746  | -2.661102 | -3.703213 |
| 103 | 1  | 0 | 2.537260  | -1.109044 | -3.087641 |
| 104 | 1  | 0 | 4.108730  | -1.769421 | -2.541586 |
| 105 | 6  | 0 | 1.016763  | -3.265245 | -2.185550 |
| 106 | 1  | 0 | 0.442437  | -3.797922 | -1.413499 |
| 107 | 1  | 0 | 0.390191  | -2.448212 | -2.562996 |
| 108 | 1  | 0 | 1.168428  | -3.970386 | -3.016333 |
| 109 | 6  | 0 | 4.652530  | -1.453168 | 0.308981  |
| 110 | 8  | 0 | 5.524745  | -0.557467 | 0.144383  |
| 111 | 8  | 0 | 4.783374  | -2.538449 | 0.899793  |
| 112 | 8  | 0 | 3.441845  | -1.084978 | -0.254935 |
| 113 | 1  | 0 | 1.545716  | 0.157525  | 1.249139  |
| 114 | 55 | 0 | 7.544495  | -2.173123 | 1.754711  |
| 115 | 55 | 0 | 4.050213  | 1.597071  | -1.448728 |

-----  
Zero-point correction= 0.911254 (Hartree/Particle)  
Thermal correction to Energy= 0.972297  
Thermal correction to Enthalpy= 0.973241  
Thermal correction to Gibbs Free Energy= 0.810096  
Sum of electronic and zero-point Energies= -3322.151448  
Sum of electronic and thermal Energies= -3322.090405  
Sum of electronic and thermal Enthalpies= -3322.089460  
Sum of electronic and thermal Free Energies= -3322.252605  
M06/6-311++G(d,p)-SDD/SMD//m06/6-31G(d)-LANL2DZ energy in acetonitrile solvent = -3326.0837798

### TS7c

-----

| Center Number | Atomic Number | Atomic Type | Coordinates (Angstroms) |           |           |
|---------------|---------------|-------------|-------------------------|-----------|-----------|
|               |               |             | X                       | Y         | Z         |
| 1             | 26            | 0           | -4.602150               | 2.006129  | -0.409523 |
| 2             | 15            | 0           | -1.929166               | 1.294314  | 1.573376  |
| 3             | 15            | 0           | -3.297887               | -1.134653 | -0.857903 |
| 4             | 6             | 0           | 0.111084                | 1.869085  | 3.391107  |
| 5             | 6             | 0           | -2.943750               | 0.827937  | 3.024130  |
| 6             | 6             | 0           | -4.226484               | -0.866051 | 4.185914  |

|    |   |   |           |           |           |
|----|---|---|-----------|-----------|-----------|
| 7  | 6 | 0 | -0.639282 | 2.364051  | 2.317682  |
| 8  | 6 | 0 | -4.549161 | 0.055329  | 5.176994  |
| 9  | 6 | 0 | -3.259446 | 1.743716  | 4.034362  |
| 10 | 6 | 0 | -3.420299 | -0.481397 | 3.118206  |
| 11 | 6 | 0 | -4.060485 | 1.358551  | 5.103271  |
| 12 | 6 | 0 | -0.322415 | 3.616734  | 1.788792  |
| 13 | 6 | 0 | 0.715910  | 4.367638  | 2.334168  |
| 14 | 6 | 0 | -4.712400 | 0.020948  | -0.852980 |
| 15 | 6 | 0 | -5.220916 | 0.803537  | -1.937648 |
| 16 | 6 | 0 | -3.125438 | -1.500808 | -2.649883 |
| 17 | 6 | 0 | -4.567516 | 4.004645  | 0.008251  |
| 18 | 6 | 0 | -5.497850 | 0.335737  | 0.305822  |
| 19 | 6 | 0 | -6.304543 | 1.587413  | -1.451525 |
| 20 | 6 | 0 | 1.138199  | 2.625633  | 3.942225  |
| 21 | 6 | 0 | -6.480025 | 1.293082  | -0.070131 |
| 22 | 6 | 0 | -2.465923 | -0.549436 | -3.439177 |
| 23 | 6 | 0 | -2.959129 | 2.478630  | 0.665270  |
| 24 | 6 | 0 | -3.554168 | -2.689427 | -3.242707 |
| 25 | 6 | 0 | -3.747638 | 3.723215  | -1.121179 |
| 26 | 6 | 0 | -4.084481 | 3.246210  | 1.110203  |
| 27 | 6 | 0 | -2.756831 | 2.785049  | -0.722305 |
| 28 | 6 | 0 | -4.055878 | -2.635320 | -0.131268 |
| 29 | 6 | 0 | -5.386170 | -2.999464 | -0.369768 |
| 30 | 6 | 0 | -3.323738 | -2.924138 | -4.596363 |
| 31 | 6 | 0 | -2.261375 | -0.772438 | -4.795371 |
| 32 | 6 | 0 | -2.683769 | -1.967097 | -5.375491 |
| 33 | 6 | 0 | 1.443156  | 3.878943  | 3.413950  |
| 34 | 6 | 0 | -3.802484 | -4.572690 | 1.299512  |
| 35 | 6 | 0 | -3.271586 | -3.428464 | 0.710801  |
| 36 | 6 | 0 | -5.124267 | -4.929199 | 1.052531  |
| 37 | 6 | 0 | -5.915704 | -4.142667 | 0.217920  |
| 38 | 1 | 0 | -1.991282 | 2.340096  | -1.353381 |
| 39 | 1 | 0 | -3.891156 | 4.112623  | -2.123765 |
| 40 | 1 | 0 | -5.449735 | 4.636800  | 0.011849  |
| 41 | 1 | 0 | -4.534653 | 3.195233  | 2.096853  |
| 42 | 1 | 0 | -5.346249 | -0.067732 | 1.304340  |
| 43 | 1 | 0 | -7.195979 | 1.761357  | 0.597371  |
| 44 | 1 | 0 | -6.863430 | 2.320626  | -2.023740 |
| 45 | 1 | 0 | -4.822240 | 0.822494  | -2.947213 |
| 46 | 1 | 0 | -3.153975 | -1.203559 | 2.344517  |
| 47 | 1 | 0 | -4.594318 | -1.889462 | 4.242617  |
| 48 | 1 | 0 | -5.174966 | -0.242815 | 6.016345  |
| 49 | 1 | 0 | -4.301309 | 2.076349  | 5.885511  |
| 50 | 1 | 0 | -2.864115 | 2.759517  | 3.988147  |
| 51 | 1 | 0 | -0.890829 | 4.015829  | 0.949069  |
| 52 | 1 | 0 | 0.947077  | 5.345355  | 1.912831  |
| 53 | 1 | 0 | 2.245357  | 4.474639  | 3.848002  |
| 54 | 1 | 0 | 1.699434  | 2.238799  | 4.791666  |
| 55 | 1 | 0 | -0.124761 | 0.888005  | 3.808784  |
| 56 | 1 | 0 | -4.061167 | -3.445812 | -2.644100 |
| 57 | 1 | 0 | -3.654396 | -3.860167 | -5.043154 |
| 58 | 1 | 0 | -2.510284 | -2.150921 | -6.434191 |
| 59 | 1 | 0 | -1.758687 | -0.019058 | -5.399901 |
| 60 | 1 | 0 | -2.106527 | 0.374399  | -2.979925 |
| 61 | 1 | 0 | -2.235044 | -3.140707 | 0.904119  |
| 62 | 1 | 0 | -3.182037 | -5.185334 | 1.951674  |
| 63 | 1 | 0 | -5.542709 | -5.822588 | 1.512975  |
| 64 | 1 | 0 | -6.950840 | -4.419856 | 0.026447  |
| 65 | 1 | 0 | -6.008909 | -2.380245 | -1.017209 |
| 66 | 6 | 0 | 2.794516  | 3.418389  | -0.720561 |
| 67 | 6 | 0 | 3.079726  | 2.734241  | 0.468540  |
| 68 | 6 | 0 | 2.453217  | 1.535475  | 0.778910  |
| 69 | 6 | 0 | 1.511221  | 0.954411  | -0.083093 |
| 70 | 6 | 0 | 1.202662  | 1.656566  | -1.261902 |
| 71 | 6 | 0 | 1.829953  | 2.854605  | -1.572123 |
| 72 | 1 | 0 | 3.822368  | 3.137312  | 1.157923  |
| 73 | 1 | 0 | 2.707571  | 1.018528  | 1.704718  |

|     |    |   |           |           |           |
|-----|----|---|-----------|-----------|-----------|
| 74  | 1  | 0 | 0.446376  | 1.258302  | -1.940367 |
| 75  | 1  | 0 | 1.543454  | 3.386396  | -2.479962 |
| 76  | 46 | 0 | -1.205644 | -0.456922 | 0.124322  |
| 77  | 6  | 0 | 3.503739  | 4.663083  | -1.073966 |
| 78  | 6  | 0 | 3.910652  | 5.569884  | -0.086226 |
| 79  | 6  | 0 | 3.811160  | 4.959933  | -2.408538 |
| 80  | 6  | 0 | 4.601409  | 6.727564  | -0.421258 |
| 81  | 1  | 0 | 3.660272  | 5.375351  | 0.956941  |
| 82  | 6  | 0 | 4.500343  | 6.118880  | -2.745136 |
| 83  | 1  | 0 | 3.513569  | 4.266121  | -3.196462 |
| 84  | 6  | 0 | 4.900420  | 7.007156  | -1.751561 |
| 85  | 1  | 0 | 4.900404  | 7.422162  | 0.361862  |
| 86  | 1  | 0 | 4.730397  | 6.327340  | -3.788775 |
| 87  | 1  | 0 | 5.440788  | 7.914801  | -2.013046 |
| 88  | 6  | 0 | 0.644619  | -1.313741 | -0.756254 |
| 89  | 6  | 0 | 0.942632  | -0.354364 | 0.252040  |
| 90  | 6  | 0 | 0.685810  | -2.721948 | -0.541031 |
| 91  | 1  | 0 | 0.699828  | -0.980773 | -1.792069 |
| 92  | 6  | 0 | 0.535126  | -3.690401 | -1.709201 |
| 93  | 6  | 0 | 0.956428  | -3.265843 | 0.749618  |
| 94  | 1  | 0 | 0.689014  | -4.316582 | 0.889129  |
| 95  | 1  | 0 | 2.192945  | -3.202629 | 0.810519  |
| 96  | 1  | 0 | 0.637280  | -2.657720 | 1.601669  |
| 97  | 6  | 0 | 1.699649  | -4.694300 | -1.699936 |
| 98  | 1  | 0 | 1.684754  | -5.339034 | -0.812236 |
| 99  | 1  | 0 | 1.615833  | -5.345299 | -2.581715 |
| 100 | 1  | 0 | 2.653546  | -4.153770 | -1.721215 |
| 101 | 6  | 0 | 0.516467  | -2.997789 | -3.070715 |
| 102 | 1  | 0 | 0.384822  | -3.752443 | -3.858169 |
| 103 | 1  | 0 | -0.314405 | -2.284153 | -3.165690 |
| 104 | 1  | 0 | 1.463850  | -2.475466 | -3.260693 |
| 105 | 6  | 0 | -0.784165 | -4.463032 | -1.548758 |
| 106 | 1  | 0 | -0.818640 | -5.039207 | -0.614758 |
| 107 | 1  | 0 | -1.654055 | -3.792943 | -1.569790 |
| 108 | 1  | 0 | -0.891207 | -5.171658 | -2.382608 |
| 109 | 6  | 0 | 4.059940  | -2.245825 | -0.001327 |
| 110 | 8  | 0 | 5.211097  | -1.696782 | 0.130603  |
| 111 | 8  | 0 | 3.597919  | -2.958581 | 1.007999  |
| 112 | 8  | 0 | 3.359447  | -2.121288 | -1.057904 |
| 113 | 1  | 0 | 1.266162  | -0.727287 | 1.227526  |
| 114 | 55 | 0 | 6.154554  | -3.351602 | 2.339623  |
| 115 | 55 | 0 | 4.643120  | 0.376939  | -1.933536 |

-----  
Zero-point correction= 0.904397 (Hartree/Particle)  
Thermal correction to Energy= 0.965541  
Thermal correction to Enthalpy= 0.966486  
Thermal correction to Gibbs Free Energy= 0.804092  
Sum of electronic and zero-point Energies= -3322.115739  
Sum of electronic and thermal Energies= -3322.054594  
Sum of electronic and thermal Enthalpies= -3322.053650  
Sum of electronic and thermal Free Energies= -3322.216044  
M06/6-311++G(d,p)-SDD/SMD//m06/6-31G(d)-LANL2DZ energy in acetonitrile solvent = -3326.0476385

### INT11c

-----

| Center<br>Number | Atomic<br>Number | Atomic<br>Type | Coordinates (Angstroms) |           |           |
|------------------|------------------|----------------|-------------------------|-----------|-----------|
|                  |                  |                | X                       | Y         | Z         |
| 1                | 26               | 0              | -0.728849               | -2.354960 | 2.305168  |
| 2                | 15               | 0              | 0.599371                | -1.580934 | -0.749565 |
| 3                | 15               | 0              | -2.373027               | 0.183071  | 0.669657  |
| 4                | 6                | 0              | 2.554538                | -1.574009 | -2.737604 |
| 5                | 6                | 0              | -0.228539               | -2.974479 | -1.614860 |
| 6                | 6                | 0              | -2.204425               | -3.800281 | -2.748111 |
| 7                | 6                | 0              | 2.323650                | -1.736255 | -1.366289 |
| 8                | 6                | 0              | -1.598132               | -5.042340 | -2.906706 |
| 9                | 6                | 0              | 0.380486                | -4.220450 | -1.798770 |

|    |    |   |           |           |           |
|----|----|---|-----------|-----------|-----------|
| 10 | 6  | 0 | -1.518805 | -2.769898 | -2.110105 |
| 11 | 6  | 0 | -0.303114 | -5.249961 | -2.435972 |
| 12 | 6  | 0 | 3.411849  | -1.947334 | -0.517811 |
| 13 | 6  | 0 | 4.703820  | -2.012752 | -1.033741 |
| 14 | 6  | 0 | -2.377909 | -1.260312 | 1.799016  |
| 15 | 6  | 0 | -2.209806 | -1.286261 | 3.219081  |
| 16 | 6  | 0 | -2.749540 | 1.548775  | 1.844466  |
| 17 | 6  | 0 | 0.884941  | -3.449397 | 2.894876  |
| 18 | 6  | 0 | -2.499253 | -2.620545 | 1.360964  |
| 19 | 6  | 0 | -2.230544 | -2.643744 | 3.648697  |
| 20 | 6  | 0 | 3.841302  | -1.656383 | -3.253667 |
| 21 | 6  | 0 | -2.417471 | -3.466842 | 2.501891  |
| 22 | 6  | 0 | -1.684712 | 2.042559  | 2.609707  |
| 23 | 6  | 0 | 0.772473  | -2.189756 | 0.956177  |
| 24 | 6  | 0 | -3.999252 | 2.161475  | 1.956132  |
| 25 | 6  | 0 | 1.061853  | -2.081754 | 3.252116  |
| 26 | 6  | 0 | 0.713627  | -3.520770 | 1.483507  |
| 27 | 6  | 0 | 0.993416  | -1.305518 | 2.063213  |
| 28 | 6  | 0 | -3.956252 | -0.075670 | -0.223213 |
| 29 | 6  | 0 | -5.085151 | -0.654034 | 0.368926  |
| 30 | 6  | 0 | -4.179212 | 3.243452  | 2.815200  |
| 31 | 6  | 0 | -1.870386 | 3.106726  | 3.483298  |
| 32 | 6  | 0 | -3.120313 | 3.714860  | 3.582748  |
| 33 | 6  | 0 | 4.921216  | -1.877291 | -2.400618 |
| 34 | 6  | 0 | -5.197266 | 0.176539  | -2.287801 |
| 35 | 6  | 0 | -4.020958 | 0.332266  | -1.558625 |
| 36 | 6  | 0 | -6.314034 | -0.397807 | -1.691105 |
| 37 | 6  | 0 | -6.256980 | -0.813383 | -0.361751 |
| 38 | 1  | 0 | 1.063870  | -0.223545 | 1.984882  |
| 39 | 1  | 0 | 1.168869  | -1.694941 | 4.260302  |
| 40 | 1  | 0 | 0.824991  | -4.285137 | 3.585153  |
| 41 | 1  | 0 | 0.493989  | -4.417775 | 0.911810  |
| 42 | 1  | 0 | -2.598577 | -2.946255 | 0.328379  |
| 43 | 1  | 0 | -2.429200 | -4.551986 | 2.488550  |
| 44 | 1  | 0 | -2.077341 | -2.990808 | 4.665730  |
| 45 | 1  | 0 | -2.052414 | -0.418377 | 3.851916  |
| 46 | 1  | 0 | -1.982635 | -1.787344 | -1.991488 |
| 47 | 1  | 0 | -3.210281 | -3.627443 | -3.128022 |
| 48 | 1  | 0 | -2.129810 | -5.849146 | -3.409028 |
| 49 | 1  | 0 | 0.177905  | -6.217518 | -2.572942 |
| 50 | 1  | 0 | 1.401710  | -4.379176 | -1.448503 |
| 51 | 1  | 0 | 3.253290  | -2.069218 | 0.553658  |
| 52 | 1  | 0 | 5.543213  | -2.177093 | -0.358498 |
| 53 | 1  | 0 | 5.932102  | -1.938320 | -2.802804 |
| 54 | 1  | 0 | 4.004114  | -1.542094 | -4.324661 |
| 55 | 1  | 0 | 1.710523  | -1.386589 | -3.405794 |
| 56 | 1  | 0 | -4.838085 | 1.801430  | 1.360652  |
| 57 | 1  | 0 | -5.156968 | 3.717978  | 2.884912  |
| 58 | 1  | 0 | -3.264608 | 4.559336  | 4.254518  |
| 59 | 1  | 0 | -1.033940 | 3.474223  | 4.075926  |
| 60 | 1  | 0 | -0.697045 | 1.587826  | 2.506062  |
| 61 | 1  | 0 | -3.144187 | 0.790830  | -2.024541 |
| 62 | 1  | 0 | -5.235178 | 0.507076  | -3.325187 |
| 63 | 1  | 0 | -7.234040 | -0.523951 | -2.260079 |
| 64 | 1  | 0 | -7.130668 | -1.264095 | 0.106964  |
| 65 | 1  | 0 | -5.044006 | -0.978728 | 1.409691  |
| 66 | 6  | 0 | 4.739430  | 1.748560  | -0.003818 |
| 67 | 6  | 0 | 4.532765  | 1.513754  | -1.367394 |
| 68 | 6  | 0 | 3.268025  | 1.599956  | -1.926825 |
| 69 | 6  | 0 | 2.143289  | 1.923833  | -1.156703 |
| 70 | 6  | 0 | 2.353070  | 2.167207  | 0.211525  |
| 71 | 6  | 0 | 3.617914  | 2.080332  | 0.770338  |
| 72 | 1  | 0 | 5.383770  | 1.284382  | -2.008761 |
| 73 | 1  | 0 | 3.139628  | 1.414723  | -2.994044 |
| 74 | 1  | 0 | 1.501765  | 2.406671  | 0.850395  |
| 75 | 1  | 0 | 3.737803  | 2.242051  | 1.842074  |
| 76 | 46 | 0 | -0.477775 | 0.543708  | -0.738201 |

|     |   |   |           |           |           |
|-----|---|---|-----------|-----------|-----------|
| 77  | 6 | 0 | 6.083867  | 1.651147  | 0.592879  |
| 78  | 6 | 0 | 7.019310  | 0.720723  | 0.120084  |
| 79  | 6 | 0 | 6.468837  | 2.490766  | 1.646314  |
| 80  | 6 | 0 | 8.288635  | 0.633964  | 0.678574  |
| 81  | 1 | 0 | 6.732377  | 0.040486  | -0.682723 |
| 82  | 6 | 0 | 7.736087  | 2.401795  | 2.208465  |
| 83  | 1 | 0 | 5.771159  | 3.245092  | 2.009495  |
| 84  | 6 | 0 | 8.653818  | 1.472973  | 1.727334  |
| 85  | 1 | 0 | 8.996457  | -0.100576 | 0.296097  |
| 86  | 1 | 0 | 8.012735  | 3.071331  | 3.021846  |
| 87  | 1 | 0 | 9.647983  | 1.403488  | 2.165918  |
| 88  | 6 | 0 | -0.277261 | 2.694719  | -1.316017 |
| 89  | 6 | 0 | 0.827296  | 1.978555  | -1.803680 |
| 90  | 6 | 0 | -1.430522 | 3.112751  | -2.137059 |
| 91  | 1 | 0 | -0.134886 | 3.234451  | -0.380413 |
| 92  | 6 | 0 | -2.325916 | 4.259167  | -1.623087 |
| 93  | 6 | 0 | -1.689933 | 2.566229  | -3.339342 |
| 94  | 1 | 0 | -2.517607 | 2.903701  | -3.961462 |
| 95  | 1 | 0 | -1.087351 | 1.757590  | -3.751412 |
| 96  | 6 | 0 | -2.104329 | 5.479194  | -2.524947 |
| 97  | 1 | 0 | -2.394760 | 5.271616  | -3.563084 |
| 98  | 1 | 0 | -2.695889 | 6.335477  | -2.167169 |
| 99  | 1 | 0 | -1.045428 | 5.774761  | -2.527529 |
| 100 | 6 | 0 | -2.017523 | 4.674757  | -0.183246 |
| 101 | 1 | 0 | -2.755682 | 5.419754  | 0.146837  |
| 102 | 1 | 0 | -2.076820 | 3.823849  | 0.509291  |
| 103 | 1 | 0 | -1.025000 | 5.136097  | -0.086390 |
| 104 | 6 | 0 | -3.803656 | 3.856767  | -1.666859 |
| 105 | 1 | 0 | -4.125020 | 3.540712  | -2.667749 |
| 106 | 1 | 0 | -4.007364 | 3.026988  | -0.974020 |
| 107 | 1 | 0 | -4.433705 | 4.706883  | -1.366008 |
| 108 | 1 | 0 | 0.846897  | 1.718163  | -2.866038 |

-----  
Zero-point correction= 0.877316 (Hartree/Particle)  
Thermal correction to Energy= 0.930391  
Thermal correction to Enthalpy= 0.931335  
Thermal correction to Gibbs Free Energy= 0.789514  
Sum of electronic and zero-point Energies= -3018.209091  
Sum of electronic and thermal Energies= -3018.156016  
Sum of electronic and thermal Enthalpies= -3018.155072  
Sum of electronic and thermal Free Energies= -3018.296893  
M06/6-311++G(d,p)-SDD/SMD//m06/6-31G(d)-LANL2DZ energy in acetonitrile solvent = -3021.3810415

### 3c

-----

| Center<br>Number | Atomic<br>Number | Atomic<br>Type | Coordinates (Angstroms) |           |           |
|------------------|------------------|----------------|-------------------------|-----------|-----------|
|                  |                  |                | X                       | Y         | Z         |
| 1                | 6                | 0              | -2.541911               | -0.186945 | -0.001852 |
| 2                | 6                | 0              | -2.012193               | -1.357081 | 0.551925  |
| 3                | 6                | 0              | -0.647870               | -1.599191 | 0.536298  |
| 4                | 6                | 0              | 0.250250                | -0.684224 | -0.027394 |
| 5                | 6                | 0              | -0.283802               | 0.482974  | -0.592258 |
| 6                | 6                | 0              | -1.645841               | 0.726250  | -0.575035 |
| 7                | 1                | 0              | -2.680600               | -2.075025 | 1.026204  |
| 8                | 1                | 0              | -0.256679               | -2.513985 | 0.982902  |
| 9                | 1                | 0              | 0.378418                | 1.201296  | -1.074387 |
| 10               | 1                | 0              | -2.033919               | 1.627563  | -1.048956 |
| 11               | 6                | 0              | -3.993626               | 0.073170  | 0.008636  |
| 12               | 6                | 0              | -4.911468               | -0.971537 | -0.152624 |
| 13               | 6                | 0              | -4.491277               | 1.370091  | 0.181630  |
| 14               | 6                | 0              | -6.278645               | -0.728568 | -0.140079 |
| 15               | 1                | 0              | -4.542995               | -1.983540 | -0.318524 |
| 16               | 6                | 0              | -5.858355               | 1.614447  | 0.193337  |
| 17               | 1                | 0              | -3.793574               | 2.192381  | 0.338017  |
| 18               | 6                | 0              | -6.758553               | 0.565803  | 0.033014  |
| 19               | 1                | 0              | -6.974971               | -1.554587 | -0.275769 |



|    |   |   |           |           |           |
|----|---|---|-----------|-----------|-----------|
| 20 | 1 | 0 | -6.223851 | 2.629919  | 0.337730  |
| 21 | 1 | 0 | -7.830184 | 0.756785  | 0.042455  |
| 22 | 6 | 0 | 2.681893  | -0.145013 | -0.309014 |
| 23 | 6 | 0 | 1.677593  | -0.983949 | -0.005684 |
| 24 | 6 | 0 | 4.103711  | -0.512862 | -0.302503 |
| 25 | 1 | 0 | 2.441264  | 0.894892  | -0.546507 |
| 26 | 6 | 0 | 5.086553  | 0.561773  | 0.155715  |
| 27 | 6 | 0 | 4.481587  | -1.735502 | -0.700561 |
| 28 | 1 | 0 | 5.515058  | -2.070632 | -0.678364 |
| 29 | 1 | 0 | 3.752082  | -2.447103 | -1.083785 |
| 30 | 6 | 0 | 4.660479  | 1.087044  | 1.530575  |
| 31 | 1 | 0 | 4.654241  | 0.276717  | 2.272595  |
| 32 | 1 | 0 | 5.358992  | 1.861844  | 1.877394  |
| 33 | 1 | 0 | 3.654785  | 1.526854  | 1.510630  |
| 34 | 6 | 0 | 5.087270  | 1.715568  | -0.855118 |
| 35 | 1 | 0 | 5.798990  | 2.491693  | -0.539371 |
| 36 | 1 | 0 | 5.386948  | 1.362427  | -1.851211 |
| 37 | 1 | 0 | 4.103909  | 2.195079  | -0.947621 |
| 38 | 6 | 0 | 6.511616  | 0.028144  | 0.265115  |
| 39 | 1 | 0 | 6.578298  | -0.801754 | 0.981851  |
| 40 | 1 | 0 | 6.891372  | -0.323370 | -0.703874 |
| 41 | 1 | 0 | 7.181605  | 0.825684  | 0.613982  |
| 42 | 1 | 0 | 1.936348  | -1.995499 | 0.319879  |

-----

Zero-point correction= 0.360530 (Hartree/Particle)  
Thermal correction to Energy= 0.379302  
Thermal correction to Enthalpy= 0.380246  
Thermal correction to Gibbs Free Energy= 0.312317  
Sum of electronic and zero-point Energies= -774.379070  
Sum of electronic and thermal Energies= -774.360298  
Sum of electronic and thermal Enthalpies= -774.359353  
Sum of electronic and thermal Free Energies= -774.427283  
M06/6-311++G(d,p)-SDD/SMD//m06/6-31G(d)-LANL2DZ energy in acetonitrile solvent = -774.9450768
